# Supplementary material for: Thermodynamic matchers for the construction of the cuckoo RNA family
Source: PubMed Central journal article supplement — RNA Biol. 2015 Mar 16;12(2):197–207. doi: 10.1080/15476286.2015.1017206 (PMC4615179; doi:10.1080/15476286.2015.1017206), 2015-03-16
Supplement: krnb-12-02-1017206-s001.pdf [file krnb-12-02-1017206-s001.pdf]

## SUPPLEMENTARY MATERIAL

### Thermodynamic matchers for the construction of the cuckoo RNA family

Jan Reinkensmeier<sup>1</sup>, Robert Giegerich<sup>1,\*</sup>

<sup>1</sup>Universität Bielefeld, Technische Fakultät and Center of Biotechnology, 33501 Bielefeld, Germany

\*Correspondence to: Robert Giegerich; Email: [robert@techfak.uni-bielefeld.de](mailto:robert@techfak.uni-bielefeld.de)

#### **This file contains:**

#### **Supplementary Methods**

**Figure S1.** Unified grammar for auxiliary TDMs.

**Figure S2.** Grammar of HP2 cuckoo RNA specific TDM  $tdm_{HP2}$

**Table S1.** Identified cuckoo RNAs

**Table S2.** Synteny and genomic context of cuckoo RNAs

**Table S3.** Structure properties of cuckoo RNAs

**Table S4.** Sequences of cuckoo RNAs

**Table S5.** Cuckoo RNAs discovered in other studies

## Methods

### Deriving structure and sequence characteristics for TDM modeling

The design decisions of a TDM rest on observations of the extrema of the structural features and the deviation in sequence patterns. As a consequence, two sources of information based on the already known RNAs belonging to the family under consideration are needed to parameterize a TDM: (1) a multiple structure alignment for discovering conserved sequence motifs and to obtain the consensus secondary structure and (2) individual secondary structure folds to derive the range of structural variation. Implicitly, structural variation refers to the variation of RNAs folded into the family's overall structure, not to the variation of MFE structures. Thus, in order to guarantee that a cuckoo RNA folds into the characteristic shape of the family and yet in the energetically optimal way, three auxiliary TDMs,  $tdm_{AUX\_HP2}$ ,  $tdm_{AUX\_HP3}$ ,  $tdm_{AUX\_HP4}$ , one for each structural variant, were designed (**Fig. S1**).

Like RNAfold, most software tools that implement constraint folding define structure constraints on the base or base-pair level. Such constraints can be easily derived for the cuckoo family from the existing structure alignments, but we have to bear in mind that there often is an underrepresentation of base-pairs and stacking in the consensus structure for some RNAs in the alignments, causing suboptimal energies if the RNAs are folded into the consensus. Therefore, the intention to use TDMs is to enable a cuckoo RNA to fold into the family's structure and only the family's structure, but with the highest degree of freedom (as few constraints as needed). For example, the grammar of  $tdm_{AUX\_HP2}$  defines two hairpins with arbitrary lengths of stems and hairpin loops. The only restriction is that in every loop the cuckoo motif must be present. Except for the motif constraint this definition is equivalent to the RNASHAPES constraint folding using the most abstract level 5 (RNASHAPES -C '[][]'). The grammars of the other auxiliary TDMs,  $tdm_{AUX\_HP3}$  and  $tdm_{AUX\_HP4}$ , define three and four hairpins, respectively, and require the cuckoo motif in one of the motif variants observed with this number of hairpins.

The auxiliary TDMs described here were applied on the 145 previously known cuckoo RNAs (**Table S5**) and the feature information that was gathered from this analysis was used to build the initial skeleton and cuckoo TDMs.

## Supplementary figures

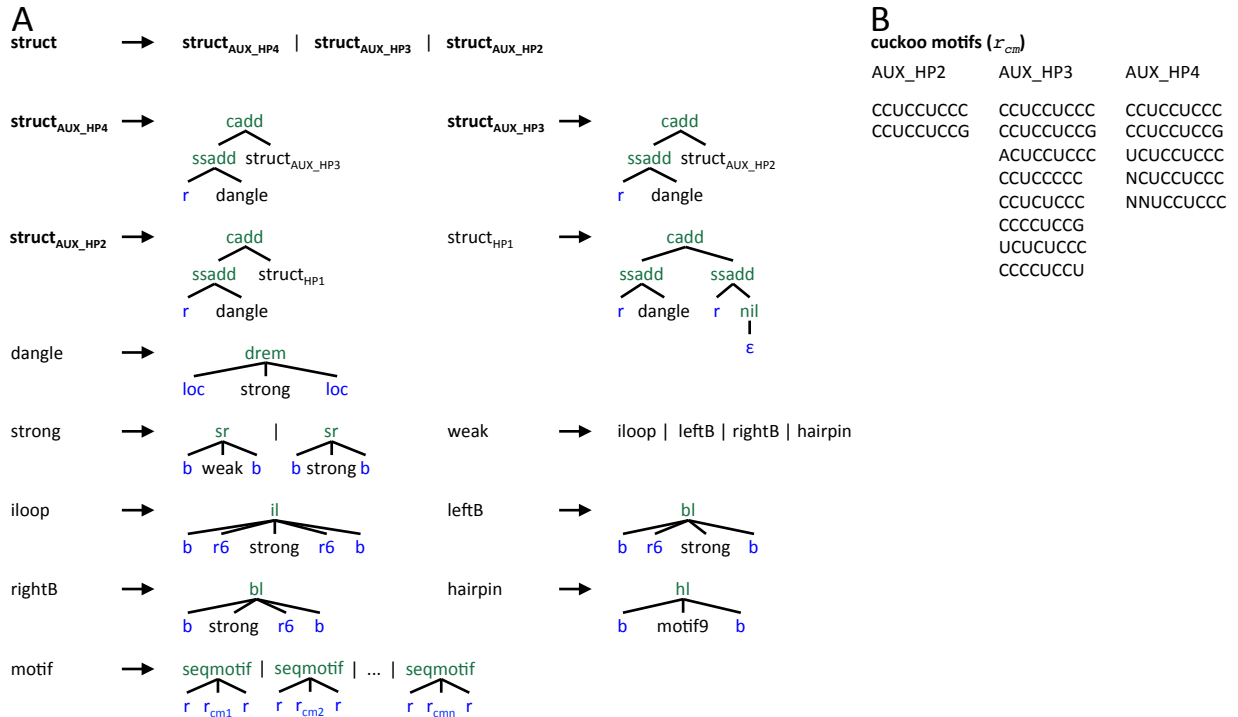

**Figure S1. Unified grammar for auxiliary TDMs (A) and sequence constraints for cuckoo motifs (B).** The auxiliary TDM grammars base on the same standard RNA folding grammar that is used by the cuckoo TDM grammar.  $struct_{AUX\_X}$  is the grammars axiom, where  $X \in \{HP2, HP3, HP4\}$  denotes the structural variant of a cuckoo RNA that folds into two, three or four hairpins, respectively (A). Size thresholds are applied only for helix interruptions, which are restricted to a maximum of six bases ( $r6$ ), and the length of hairpin loops, which must be at least nine bases long ( $motif9$ ). For each cuckoo motif in (B) an alternative production of  $seqmotif$  exists in the respective grammar, where  $r_{cm}$  corresponds to the cuckoo motif. The IUPAC convention is used to express cuckoo motifs.

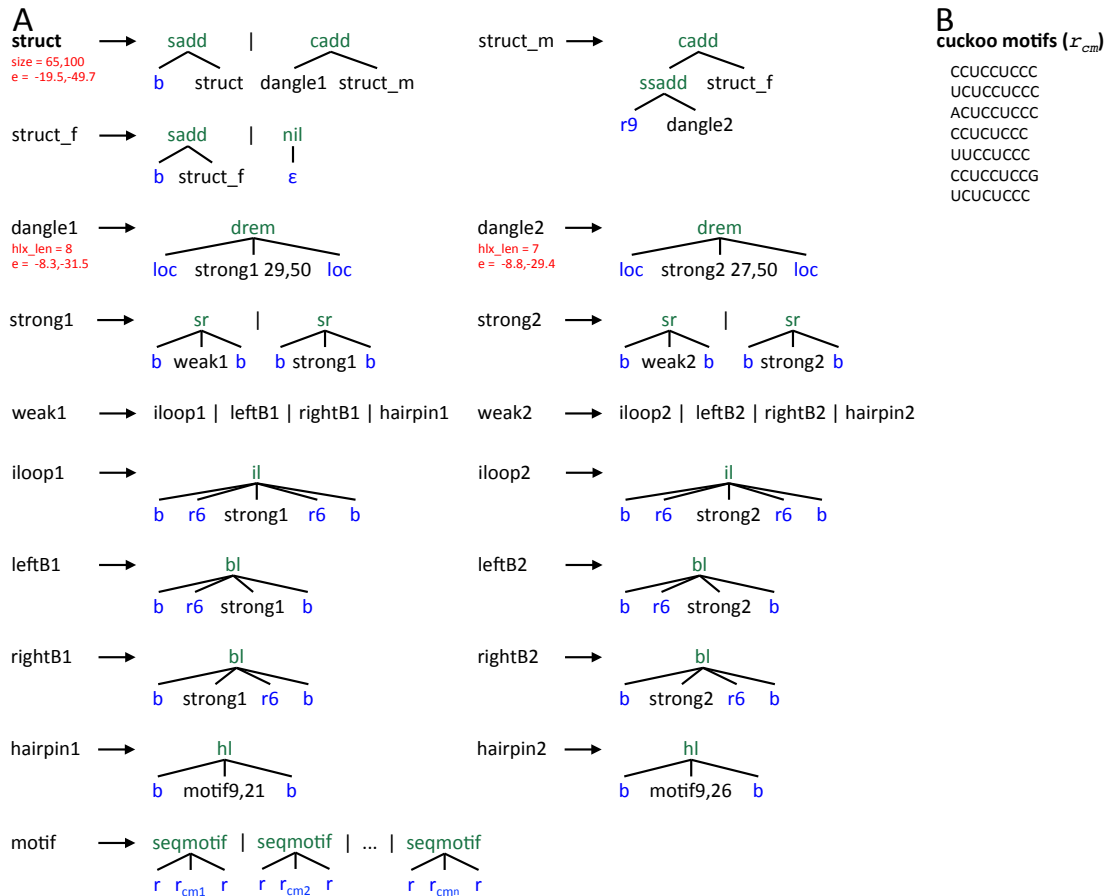

**Figure S2. Grammar of HP2 cuckoo RNA specific TDM  $tdm_{HP2}$  (A) and sequence constraints for cuckoo motifs (B).** Generally, the grammar of  $tdm_{HP2}$  is a less generic version of the cuckoo TDM grammar, and is tailored to cuckoo RNAs that consist of two hairpins (*struct*) (A). Both grammars apply the same algebra functions and production rules (see Methods for details). However, in order to apply specific constraints for the stem-loops separate nonterminals are defined, which are annotated at the end with a '1' for the first and a '2' for the second stem-loop. Vertical bars separate alternative productions that start at the same nonterminal. Algebra functions are colored in green and built the tree-like data structure from terminals and nonterminals. The functions call upon the energy functions of the thermodynamic model to compute free energies for the corresponding substructure. The following terminals (in blue) are used:  $\epsilon$  denotes the empty word,  $b$  a single base from the RNA alphabet  $\{A, C, G, U\}$ ,  $r$  a region of bases, and *loc* the end position of a neighbor subword. Numbers depict thresholds for size filters. A single number specifies the maximum size while two numbers determine a size range. Filter of nonterminals are colored red. Next to the helix length filter (*hlx\_len*), an energy (*e*) and a global size filter (*size*) are introduced. These filter are applied either on the entire hairpin substructures (*dangle1*,

*dangle2*) or on the overall structure of the cuckoo RNA (*struct*). For each cuckoo motif in (B) an alternative production of *seqmotif* exists, where  $r_{cm}$  corresponds to the cuckoo motif. The IUPAC convention is used to express cuckoo motifs.

**Table S1.** Identified cuckoo RNAs.

| # Cuckoo RNA | Species                                        | Replicon     | Strand | Position | Length  | # Cuckoo Modules |   |
|--------------|------------------------------------------------|--------------|--------|----------|---------|------------------|---|
| 1            | <i>Brucella abortus</i> A13334                 | NC_016777    | -      | 653262   | 653336  | 75               | 2 |
| 2            | <i>Brucella abortus</i> S19                    | NC_010740    | -      | 502220   | 502294  | 75               | 2 |
| 3            | <i>Brucella abortus</i> bv. 1 str. 9-941       | NC_006933    | -      | 503016   | 503090  | 75               | 2 |
| 4            | <i>Brucella canis</i> ATCC 23365               | NC_010104    | -      | 448045   | 448112  | 68               | 2 |
| 5            | <i>Brucella canis</i> HSK A52141               | NC_016796    | +      | 347616   | 347683  | 68               | 2 |
| 6            | <i>Brucella melitensis</i> ATCC 23457          | NC_012442    | +      | 693158   | 693235  | 78               | 2 |
| 7            | <i>Brucella melitensis</i> M28                 | NC_017245    | +      | 693239   | 693316  | 78               | 2 |
| 8            | <i>Brucella melitensis</i> M5-90               | NC_017247    | +      | 693422   | 693500  | 79               | 2 |
| 9            | <i>Brucella melitensis</i> NI                  | NC_017283    | +      | 684915   | 684991  | 77               | 2 |
| 10           | <i>Brucella melitensis</i> biovar Abortus 2308 | NC_007624    | -      | 503004   | 503078  | 75               | 2 |
| 11           | <i>Brucella melitensis</i> biovar Abortus 2308 | NC_007624    | +      | 766870   | 766937  | 68               | 2 |
| 12           | <i>Brucella melitensis</i> bv. 1 str. 16M      | NC_003318    | -      | 583662   | 583740  | 79               | 2 |
| 13           | <i>Brucella melitensis</i> bv. 1 str. 16M      | NC_003318    | +      | 840862   | 840929  | 68               | 2 |
| 14           | <i>Brucella microti</i> CCM 4915               | NC_013118    | -      | 449438   | 449505  | 68               | 2 |
| 15           | <i>Brucella microti</i> CCM 4915               | NC_013118    | +      | 714994   | 715072  | 79               | 2 |
| 16           | <i>Brucella ovis</i> ATCC 25840                | NC_009504    | +      | 715283   | 715365  | 83               | 2 |
| 17           | <i>Brucella pinnipedialis</i> B2/94            | NC_015858    | +      | 769774   | 769858  | 85               | 2 |
| 18           | <i>Brucella suis</i> 1330                      | NC_004311    | +      | 714053   | 714140  | 88               | 2 |
| 19           | <i>Brucella suis</i> ATCC 23445                | NC_010167    | +      | 701948   | 702026  | 79               | 2 |
| 20           | <i>Brucella suis</i> VBI22                     | NC_016775    | +      | 714103   | 714190  | 88               | 2 |
| 21           | <i>Chelativorans</i> sp. BNC1                  | NC_008254    | +      | 215078   | 215147  | 70               | 2 |
| 22           | <i>Chelativorans</i> sp. BNC1                  | NC_008254    | +      | 247442   | 247513  | 72               | 2 |
| 23           | <i>Dinoroseobacter shibae</i> DFL 12           | NC_009952    | +      | 2630143  | 2630214 | 72               | 2 |
| 24           | <i>Jannaschia</i> sp. CCS1                     | NC_007802    | +      | 2789969  | 2790040 | 72               | 2 |
| 25           | <i>Jannaschia</i> sp. CCS1                     | NC_007802    | +      | 2790047  | 2790121 | 75               | 2 |
| 26           | <i>Jannaschia</i> sp. CCS1                     | NC_007802    | +      | 2790129  | 2790206 | 78               | 2 |
| 27           | <i>Loktanella vestfoldensis</i> DSM 16212      | ARNL01000047 | +      | 167285   | 167363  | 79               | 2 |
| 28           | <i>Loktanella vestfoldensis</i> DSM 16212      | ARNL01000047 | +      | 167366   | 167457  | 92               | 2 |
| 29           | <i>Loktanella vestfoldensis</i> SKA53          | AAMS01000006 | +      | 20806    | 20885   | 80               | 2 |
| 30           | <i>Loktanella vestfoldensis</i> SKA53          | AAMS01000006 | +      | 20888    | 20979   | 92               | 2 |
| 31           | <i>Oceanicola batsensis</i> HTCC2597           | AAMO01000006 | -      | 253329   | 253403  | 75               | 2 |
| 32           | <i>Oceanicola batsensis</i> HTCC2597           | AAMO01000015 | +      | 75594    | 75676   | 83               | 2 |
| 33           | <i>Oceanicola granulosus</i> HTCC2516          | AAOT01000003 | +      | 159000   | 159071  | 72               | 2 |
| 34           | <i>Oceanicola granulosus</i> HTCC2516          | AAOT01000003 | +      | 159079   | 159178  | 100              | 2 |
| 35           | <i>Oceanicola granulosus</i> HTCC2516          | AAOT01000003 | +      | 159179   | 159271  | 93               | 2 |
| 36           | <i>Oceanicola granulosus</i> HTCC2516          | AAOT01000003 | +      | 159276   | 159366  | 91               | 2 |
| 37           | <i>Octadecabacter antarcticus</i> 307          | NC_020911    | -      | 1186564  | 1186643 | 80               | 2 |

| # Cuckoo RNA | Species                                          | Replicon  | Strand | Position | Length  | # Cuckoo Modules |   |
|--------------|--------------------------------------------------|-----------|--------|----------|---------|------------------|---|
| 38           | Octadecabacter antarcticus 307                   | NC_020911 | +      | 1586963  | 1587043 | 81               | 2 |
| 39           | Octadecabacter arcticus 238                      | NC_020908 | +      | 725520   | 725600  | 81               | 2 |
| 40           | Octadecabacter arcticus 238                      | NC_020908 | -      | 805823   | 805900  | 78               | 2 |
| 41           | Octadecabacter arcticus 238                      | NC_020908 | +      | 2229885  | 2229964 | 80               | 2 |
| 42           | Paracoccus denitrificans PD1222                  | NC_008686 | -      | 551382   | 551460  | 79               | 2 |
| 43           | Paracoccus denitrificans PD1222                  | NC_008686 | -      | 551461   | 551537  | 77               | 2 |
| 44           | Paracoccus denitrificans PD1222                  | NC_008686 | -      | 551548   | 551620  | 73               | 2 |
| 45           | Paracoccus denitrificans PD1222                  | NC_008686 | -      | 551632   | 551708  | 77               | 2 |
| 46           | Parvibaculum lavamentivorans DS-1                | NC_009719 | -      | 2345729  | 2345812 | 84               | 2 |
| 47           | Phaeobacter gallaeciensis 2.10                   | NC_018286 | -      | 1028576  | 1028659 | 84               | 2 |
| 48           | Phaeobacter gallaeciensis 2.10                   | NC_018286 | -      | 1028692  | 1028768 | 77               | 2 |
| 49           | Phaeobacter gallaeciensis DSM 17395 = CIP 105210 | NC_018290 | -      | 969366   | 969450  | 85               | 2 |
| 50           | Phaeobacter gallaeciensis DSM 17395 = CIP 105210 | NC_018290 | -      | 969483   | 969559  | 77               | 2 |
| 51           | Rhizobium etli CIAT 652                          | NC_010997 | +      | 28126    | 28206   | 81               | 2 |
| 52           | Rhizobium leguminosarum bv. trifolii WSM2304     | NC_011369 | +      | 2611417  | 2611512 | 96               | 2 |
| 53           | Rhodobacter capsulatus SB 1003                   | NC_014034 | +      | 2557456  | 2557534 | 79               | 2 |
| 54           | Rhodobacter capsulatus SB 1003                   | NC_014034 | +      | 2557567  | 2557644 | 78               | 2 |
| 55           | Rhodobacter capsulatus SB 1003                   | NC_014034 | +      | 2557654  | 2557718 | 65               | 2 |
| 56           | Rhodobacter capsulatus SB 1003                   | NC_014034 | +      | 2557722  | 2557797 | 76               | 2 |
| 57           | Rhodobacter sphaeroides 2.4.1                    | NC_007493 | -      | 691712   | 691787  | 76               | 2 |
| 58           | Rhodobacter sphaeroides 2.4.1                    | NC_007493 | -      | 691826   | 691901  | 76               | 2 |
| 59           | Rhodobacter sphaeroides 2.4.1                    | NC_007493 | -      | 691940   | 692015  | 76               | 2 |
| 60           | Rhodobacter sphaeroides 2.4.1                    | NC_007493 | -      | 692055   | 692130  | 76               | 2 |
| 61           | Rhodobacter sphaeroides 2.4.1                    | NC_007493 | -      | 692169   | 692245  | 77               | 2 |
| 62           | Rhodobacter sphaeroides 2.4.1                    | NC_007493 | -      | 692284   | 692355  | 72               | 2 |
| 63           | Rhodobacter sphaeroides 2.4.1                    | NC_007493 | -      | 692386   | 692458  | 73               | 2 |
| 64           | Rhodobacter sphaeroides ATCC 17025               | NC_009428 | -      | 686801   | 686877  | 77               | 2 |
| 65           | Rhodobacter sphaeroides ATCC 17025               | NC_009428 | -      | 686914   | 686990  | 77               | 2 |
| 66           | Rhodobacter sphaeroides ATCC 17025               | NC_009428 | -      | 687030   | 687103  | 74               | 2 |
| 67           | Rhodobacter sphaeroides ATCC 17025               | NC_009428 | -      | 687134   | 687206  | 73               | 2 |
| 68           | Rhodobacter sphaeroides ATCC 17029               | NC_009049 | -      | 775209   | 775284  | 76               | 2 |
| 69           | Rhodobacter sphaeroides ATCC 17029               | NC_009049 | -      | 775322   | 775397  | 76               | 2 |
| 70           | Rhodobacter sphaeroides ATCC 17029               | NC_009049 | -      | 775436   | 775511  | 76               | 2 |
| 71           | Rhodobacter sphaeroides ATCC 17029               | NC_009049 | -      | 775550   | 775625  | 76               | 2 |
| 72           | Rhodobacter sphaeroides ATCC 17029               | NC_009049 | -      | 775664   | 775739  | 76               | 2 |
| 73           | Rhodobacter sphaeroides ATCC 17029               | NC_009049 | -      | 775778   | 775853  | 76               | 2 |
| 74           | Rhodobacter sphaeroides ATCC 17029               | NC_009049 | -      | 775892   | 775968  | 77               | 2 |
| 75           | Rhodobacter sphaeroides ATCC 17029               | NC_009049 | -      | 776007   | 776078  | 72               | 2 |
| 76           | Rhodobacter sphaeroides ATCC 17029               | NC_009049 | -      | 776109   | 776181  | 73               | 2 |

| # Cuckoo RNA | Species                             | Replicon     | Strand | Position | Length  | # Cuckoo Modules |   |
|--------------|-------------------------------------|--------------|--------|----------|---------|------------------|---|
| 77           | Rhodobacter sphaeroides KD131       | NC_011963    | -      | 388542   | 388617  | 76               | 2 |
| 78           | Rhodobacter sphaeroides KD131       | NC_011963    | -      | 388655   | 388733  | 79               | 2 |
| 79           | Rhodobacter sphaeroides KD131       | NC_011963    | -      | 388773   | 388848  | 76               | 2 |
| 80           | Rhodobacter sphaeroides KD131       | NC_011963    | -      | 388886   | 388961  | 76               | 2 |
| 81           | Rhodobacter sphaeroides KD131       | NC_011963    | -      | 389000   | 389076  | 77               | 2 |
| 82           | Rhodobacter sphaeroides KD131       | NC_011963    | -      | 389115   | 389186  | 72               | 2 |
| 83           | Rhodobacter sphaeroides KD131       | NC_011963    | -      | 389217   | 389289  | 73               | 2 |
| 84           | Roseobacter denitrificans OCh 114   | NC_008209    | +      | 3236828  | 3236905 | 78               | 2 |
| 85           | Roseobacter denitrificans OCh 114   | NC_008209    | +      | 3236958  | 3237038 | 81               | 2 |
| 86           | Roseobacter litoralis OCh 149       | NC_015730    | +      | 2651702  | 2651779 | 78               | 2 |
| 87           | Roseobacter litoralis OCh 149       | NC_015730    | +      | 2651849  | 2651925 | 77               | 2 |
| 88           | Roseovarius nubinhibens ISM         | AALY01000001 | -      | 1448571  | 1448659 | 89               | 2 |
| 89           | Roseovarius nubinhibens ISM         | AALY01000001 | -      | 1795550  | 1795645 | 96               | 2 |
| 90           | Roseovarius sp. 217                 | AAMV01000014 | -      | 60809    | 60892   | 84               | 2 |
| 91           | Roseovarius sp. 217                 | AAMV01000014 | -      | 60923    | 61000   | 78               | 2 |
| 92           | Ruegeria pomeroyi DSS-3             | NC_003911    | -      | 1229325  | 1229402 | 78               | 2 |
| 93           | Ruegeria pomeroyi DSS-3             | NC_003911    | -      | 1229435  | 1229515 | 81               | 2 |
| 94           | Ruegeria pomeroyi DSS-3             | NC_003911    | -      | 1229541  | 1229615 | 75               | 2 |
| 95           | Ruegeria sp. TM1040                 | NC_008044    | +      | 2128236  | 2128310 | 75               | 2 |
| 96           | Ruegeria sp. TM1040                 | NC_008044    | +      | 2128342  | 2128421 | 80               | 2 |
| 97           | Sagittula stellata E-37             | AAYA01000003 | -      | 288749   | 288824  | 76               | 2 |
| 98           | Sagittula stellata E-37             | AAYA01000003 | -      | 288853   | 288928  | 76               | 2 |
| 99           | Sagittula stellata E-37             | AAYA01000003 | -      | 288952   | 289032  | 81               | 2 |
| 100          | Sinorhizobium medicae WSM419        | NC_009636    | -      | 1974715  | 1974785 | 71               | 2 |
| 101          | Sulfitobacter sp. EE-36             | AALV01000002 | +      | 574043   | 574121  | 79               | 2 |
| 102          | Sulfitobacter sp. NAS-14.1          | AALZ01000003 | +      | 477443   | 477521  | 79               | 2 |
| 103          | Sulfitobacter sp. NAS-14.1          | AALZ01000014 | -      | 12834    | 12913   | 80               | 2 |
| 104          | Phaeobacter gallaeciensis DSM 26640 | NC_023137    | +      | 2565404  | 2565480 | 77               | 2 |
| 105          | Phaeobacter gallaeciensis DSM 26640 | NC_023137    | +      | 2565513  | 2565597 | 85               | 2 |
| 106          | Agrobacterium fabrum str. C58       | NC_003063    | +      | 1230300  | 1230420 | 121              | 3 |
| 107          | Agrobacterium radiobacter K84       | NC_011985    | +      | 597906   | 598019  | 114              | 3 |
| 108          | Agrobacterium radiobacter K84       | NC_011985    | -      | 1693286  | 1693404 | 119              | 3 |
| 109          | Agrobacterium radiobacter K84       | NC_011985    | -      | 3945513  | 3945635 | 123              | 3 |
| 110          | Agrobacterium sp. H13-3             | NC_015183    | +      | 109376   | 109491  | 116              | 3 |
| 111          | Agrobacterium sp. H13-3             | NC_015508    | +      | 1615158  | 1615278 | 121              | 3 |
| 112          | Agrobacterium vitis S4              | NC_011984    | +      | 7323     | 7437    | 115              | 3 |
| 113          | Agrobacterium vitis S4              | NC_011989    | +      | 115128   | 115250  | 123              | 3 |
| 114          | Agrobacterium vitis S4              | NC_011989    | +      | 2043917  | 2044035 | 119              | 3 |
| 115          | Brucella abortus A13334             | NC_016777    | +      | 917127   | 917244  | 118              | 3 |



| # Cuckoo RNA | Species                                               | Replicon     | Strand | Position | Length  | # Cuckoo Modules |   |
|--------------|-------------------------------------------------------|--------------|--------|----------|---------|------------------|---|
| 116          | <i>Brucella abortus</i> A13334                        | NC_016795    | -      | 2057998  | 2058103 | 106              | 3 |
| 117          | <i>Brucella abortus</i> S19                           | NC_010740    | +      | 766085   | 766202  | 118              | 3 |
| 118          | <i>Brucella abortus</i> S19                           | NC_010742    | +      | 358314   | 358419  | 106              | 3 |
| 119          | <i>Brucella abortus</i> bv. 1 str. 9-941              | NC_006932    | +      | 359929   | 360034  | 106              | 3 |
| 120          | <i>Brucella canis</i> ATCC 23365                      | NC_010103    | +      | 338025   | 338130  | 106              | 3 |
| 121          | <i>Brucella canis</i> HSK A52141                      | NC_016778    | -      | 716263   | 716368  | 106              | 3 |
| 122          | <i>Brucella melitensis</i> ATCC 23457                 | NC_012441    | +      | 358980   | 359085  | 106              | 3 |
| 123          | <i>Brucella melitensis</i> M28                        | NC_017244    | +      | 358975   | 359080  | 106              | 3 |
| 124          | <i>Brucella melitensis</i> M5-90                      | NC_017246    | +      | 359228   | 359333  | 106              | 3 |
| 125          | <i>Brucella melitensis</i> NI                         | NC_017248    | +      | 359170   | 359275  | 106              | 3 |
| 126          | <i>Brucella melitensis</i> biovar Abortus 2308        | NC_007618    | +      | 356297   | 356402  | 106              | 3 |
| 127          | <i>Brucella melitensis</i> bv. 1 str. 16M             | NC_003317    | -      | 1644164  | 1644269 | 106              | 3 |
| 128          | <i>Brucella microti</i> CCM 4915                      | NC_013119    | +      | 339703   | 339808  | 106              | 3 |
| 129          | <i>Brucella ovis</i> ATCC 25840                       | NC_009505    | +      | 359686   | 359791  | 106              | 3 |
| 130          | <i>Brucella pinnipedialis</i> B2/94                   | NC_015857    | +      | 359797   | 359902  | 106              | 3 |
| 131          | <i>Brucella pinnipedialis</i> B2/94                   | NC_015858    | -      | 432926   | 433043  | 118              | 3 |
| 132          | <i>Brucella suis</i> 1330                             | NC_004311    | -      | 448112   | 448229  | 118              | 3 |
| 133          | <i>Brucella suis</i> 1330                             | NC_004310    | +      | 338022   | 338127  | 106              | 3 |
| 134          | <i>Brucella suis</i> ATCC 23445                       | NC_010167    | -      | 449214   | 449331  | 118              | 3 |
| 135          | <i>Brucella suis</i> ATCC 23445                       | NC_010169    | +      | 355561   | 355666  | 106              | 3 |
| 136          | <i>Brucella suis</i> VBI22                            | NC_016775    | -      | 448084   | 448201  | 118              | 3 |
| 137          | <i>Brucella suis</i> VBI22                            | NC_016797    | +      | 337983   | 338088  | 106              | 3 |
| 138          | <i>Chelativorans</i> sp. BNC1                         | NC_008242    | -      | 32194    | 32312   | 119              | 3 |
| 139          | <i>Chelativorans</i> sp. BNC1                         | NC_008242    | -      | 135271   | 135381  | 111              | 3 |
| 140          | <i>Chelativorans</i> sp. BNC1                         | NC_008254    | +      | 1916700  | 1916818 | 119              | 3 |
| 141          | <i>Chelativorans</i> sp. BNC1                         | NC_008254    | -      | 3977087  | 3977203 | 117              | 3 |
| 142          | <i>Ketogulonicigenium vulgare</i> WSH-001             | NC_017384    | +      | 1585028  | 1585148 | 121              | 3 |
| 143          | <i>Ketogulonicigenium vulgare</i> Y25                 | NC_014625    | -      | 363561   | 363681  | 121              | 3 |
| 144          | <i>Loktanella vestfoldensis</i> DSM 16212             | ARNL01000047 | +      | 167460   | 167590  | 131              | 3 |
| 145          | <i>Loktanella vestfoldensis</i> SKA53                 | AAMS01000006 | +      | 20982    | 21115   | 134              | 3 |
| 146          | <i>Mesorhizobium australicum</i> WSM2073              | NC_019973    | +      | 2514219  | 2514328 | 110              | 3 |
| 147          | <i>Mesorhizobium australicum</i> WSM2073              | NC_019973    | -      | 3842524  | 3842639 | 116              | 3 |
| 148          | <i>Mesorhizobium australicum</i> WSM2073              | NC_019973    | -      | 3842695  | 3842817 | 123              | 3 |
| 149          | <i>Mesorhizobium australicum</i> WSM2073              | NC_019973    | -      | 3842878  | 3842995 | 118              | 3 |
| 150          | <i>Mesorhizobium australicum</i> WSM2073              | NC_019973    | +      | 5250476  | 5250594 | 119              | 3 |
| 151          | <i>Mesorhizobium ciceri</i> biovar biserrulae WSM1271 | NC_014918    | -      | 241411   | 241528  | 118              | 3 |
| 152          | <i>Mesorhizobium ciceri</i> biovar biserrulae WSM1271 | NC_014923    | +      | 2545677  | 2545786 | 110              | 3 |
| 153          | <i>Mesorhizobium ciceri</i> biovar biserrulae WSM1271 | NC_014923    | -      | 3674844  | 3674959 | 116              | 3 |
| 154          | <i>Mesorhizobium ciceri</i> biovar biserrulae WSM1271 | NC_014923    | -      | 3675022  | 3675138 | 117              | 3 |

| # Cuckoo RNA | Species                                        | Replicon     | Strand | Position | Length  | # Cuckoo Modules |   |
|--------------|------------------------------------------------|--------------|--------|----------|---------|------------------|---|
| 155          | Mesorhizobium ciceri biovar biserrulae WSM1271 | NC_014923    | -      | 3675192  | 3675313 | 122              | 3 |
| 156          | Mesorhizobium ciceri biovar biserrulae WSM1271 | NC_014923    | +      | 5265891  | 5266010 | 120              | 3 |
| 157          | Mesorhizobium loti MAFF303099                  | NC_002678    | +      | 890586   | 890708  | 123              | 3 |
| 158          | Mesorhizobium loti MAFF303099                  | NC_002678    | +      | 890764   | 890886  | 123              | 3 |
| 159          | Mesorhizobium loti MAFF303099                  | NC_002678    | +      | 890945   | 891060  | 116              | 3 |
| 160          | Mesorhizobium loti MAFF303099                  | NC_002678    | -      | 4952227  | 4952339 | 113              | 3 |
| 161          | Mesorhizobium loti MAFF303099                  | NC_002678    | +      | 5350765  | 5350884 | 120              | 3 |
| 162          | Mesorhizobium loti MAFF303099                  | NC_002678    | -      | 6092422  | 6092540 | 119              | 3 |
| 163          | Mesorhizobium opportunistum WSM2075            | NC_015675    | +      | 2663741  | 2663850 | 110              | 3 |
| 164          | Mesorhizobium opportunistum WSM2075            | NC_015675    | -      | 4112140  | 4112256 | 117              | 3 |
| 165          | Mesorhizobium opportunistum WSM2075            | NC_015675    | -      | 4112319  | 4112435 | 117              | 3 |
| 166          | Mesorhizobium opportunistum WSM2075            | NC_015675    | -      | 4112500  | 4112616 | 117              | 3 |
| 167          | Mesorhizobium opportunistum WSM2075            | NC_015675    | +      | 5830416  | 5830540 | 125              | 3 |
| 168          | Oceanicola granulosus HTCC2516                 | AAOT01000003 | +      | 159369   | 159502  | 134              | 3 |
| 169          | Ochrobactrum anthropi ATCC 49188               | NC_009667    | +      | 448505   | 448616  | 112              | 3 |
| 170          | Ochrobactrum anthropi ATCC 49188               | NC_009668    | -      | 273977   | 274099  | 123              | 3 |
| 171          | Ochrobactrum anthropi ATCC 49188               | NC_009668    | +      | 274692   | 274808  | 117              | 3 |
| 172          | Ochrobactrum anthropi ATCC 49188               | NC_009668    | +      | 1275653  | 1275770 | 118              | 3 |
| 173          | Octadecabacter arcticus 238                    | NC_020908    | -      | 805678   | 805816  | 139              | 3 |
| 174          | Pelagibacterium halotolerans B2                | NC_016078    | +      | 2112639  | 2112774 | 136              | 3 |
| 175          | Pelagibacterium halotolerans B2                | NC_016078    | +      | 2112938  | 2113067 | 130              | 3 |
| 176          | Polymorphum gilvum SL003B-26A1                 | NC_015259    | -      | 2331457  | 2331575 | 119              | 3 |
| 177          | Rhizobium etli CFN 42                          | NC_007761    | +      | 462572   | 462689  | 118              | 3 |
| 178          | Rhizobium etli CFN 42                          | NC_007761    | -      | 1926237  | 1926353 | 117              | 3 |
| 179          | Rhizobium etli CFN 42                          | NC_007761    | -      | 4314389  | 4314500 | 112              | 3 |
| 180          | Rhizobium etli CFN 42                          | NC_007766    | +      | 22825    | 22932   | 108              | 3 |
| 181          | Rhizobium etli CIAT 652                        | NC_010994    | +      | 513999   | 514116  | 118              | 3 |
| 182          | Rhizobium etli CIAT 652                        | NC_010994    | -      | 1912478  | 1912592 | 115              | 3 |
| 183          | Rhizobium etli CIAT 652                        | NC_010994    | -      | 4444891  | 4445011 | 121              | 3 |
| 184          | Rhizobium etli bv. mimosae str. Mim1           | NC_021905    | +      | 460364   | 460481  | 118              | 3 |
| 185          | Rhizobium etli bv. mimosae str. Mim1           | NC_021905    | -      | 1884349  | 1884464 | 116              | 3 |
| 186          | Rhizobium etli bv. mimosae str. Mim1           | NC_021905    | -      | 4217281  | 4217392 | 112              | 3 |
| 187          | Rhizobium etli bv. mimosae str. Mim1           | NC_021911    | +      | 23172    | 23285   | 114              | 3 |
| 188          | Rhizobium leguminosarum bv. trifolii WSM1325   | NC_012848    | +      | 112606   | 112722  | 117              | 3 |
| 189          | Rhizobium leguminosarum bv. trifolii WSM1325   | NC_012850    | +      | 107069   | 107186  | 118              | 3 |
| 190          | Rhizobium leguminosarum bv. trifolii WSM1325   | NC_012850    | -      | 1697043  | 1697151 | 109              | 3 |
| 191          | Rhizobium leguminosarum bv. trifolii WSM1325   | NC_012850    | -      | 4296637  | 4296748 | 112              | 3 |
| 192          | Rhizobium leguminosarum bv. trifolii WSM2304   | NC_011368    | -      | 306341   | 306452  | 112              | 3 |
| 193          | Rhizobium leguminosarum bv. trifolii WSM2304   | NC_011369    | +      | 98056    | 98173   | 118              | 3 |

| # Cuckoo RNA | Species                                      | Replicon     | Strand | Position | Length  | # Cuckoo Modules |   |
|--------------|----------------------------------------------|--------------|--------|----------|---------|------------------|---|
| 194          | Rhizobium leguminosarum bv. trifolii WSM2304 | NC_011369    | -      | 1534501  | 1534616 | 116              | 3 |
| 195          | Rhizobium leguminosarum bv. trifolii WSM2304 | NC_011369    | -      | 4019331  | 4019445 | 115              | 3 |
| 196          | Rhizobium leguminosarum bv. viciae 3841      | NC_008378    | +      | 407204   | 407312  | 109              | 3 |
| 197          | Rhizobium leguminosarum bv. viciae 3841      | NC_008380    | +      | 512664   | 512781  | 118              | 3 |
| 198          | Rhizobium leguminosarum bv. viciae 3841      | NC_008380    | -      | 2174961  | 2175069 | 109              | 3 |
| 199          | Rhizobium leguminosarum bv. viciae 3841      | NC_008380    | -      | 4988043  | 4988157 | 115              | 3 |
| 200          | Rhizobium tropici CIAT 899                   | NC_020059    | +      | 542312   | 542433  | 122              | 3 |
| 201          | Rhizobium tropici CIAT 899                   | NC_020059    | -      | 1631584  | 1631703 | 120              | 3 |
| 202          | Rhizobium tropici CIAT 899                   | NC_020059    | -      | 3775245  | 3775367 | 123              | 3 |
| 203          | Sagittula stellata E-37                      | AAYA01000003 | -      | 288595   | 288722  | 128              | 3 |
| 204          | Sinorhizobium fredii HH103                   | NC_016812    | -      | 1359348  | 1359467 | 120              | 3 |
| 205          | Sinorhizobium fredii HH103                   | NC_016812    | -      | 1359641  | 1359757 | 117              | 3 |
| 206          | Sinorhizobium fredii HH103                   | NC_016812    | +      | 4014538  | 4014654 | 117              | 3 |
| 207          | Sinorhizobium fredii HH103                   | NC_016815    | -      | 233468   | 233581  | 114              | 3 |
| 208          | Sinorhizobium fredii HH103                   | NC_018299    | +      | 158094   | 158203  | 110              | 3 |
| 209          | Sinorhizobium fredii HH103                   | NT_187148    | +      | 158094   | 158203  | 110              | 3 |
| 210          | Sinorhizobium fredii NGR234                  | NC_012586    | +      | 2205316  | 2205429 | 114              | 3 |
| 211          | Sinorhizobium fredii NGR234                  | NC_012587    | -      | 1434171  | 1434291 | 121              | 3 |
| 212          | Sinorhizobium fredii NGR234                  | NC_012587    | -      | 1434465  | 1434581 | 117              | 3 |
| 213          | Sinorhizobium fredii NGR234                  | NC_012587    | +      | 3720582  | 3720698 | 117              | 3 |
| 214          | Sinorhizobium fredii USDA 257                | NC_018000    | +      | 1713249  | 1713362 | 114              | 3 |
| 215          | Sinorhizobium fredii USDA 257                | NC_018000    | -      | 3752633  | 3752757 | 125              | 3 |
| 216          | Sinorhizobium fredii USDA 257                | NC_018000    | -      | 3752930  | 3753043 | 114              | 3 |
| 217          | Sinorhizobium fredii USDA 257                | NC_018000    | +      | 5733804  | 5733912 | 109              | 3 |
| 218          | Sinorhizobium fredii USDA 257                | NC_018000    | +      | 6267166  | 6267283 | 118              | 3 |
| 219          | Sinorhizobium fredii USDA 257                | NC_018191    | +      | 159232   | 159341  | 110              | 3 |
| 220          | Sinorhizobium medicae WSM419                 | NC_009620    | -      | 679042   | 679158  | 117              | 3 |
| 221          | Sinorhizobium medicae WSM419                 | NC_009636    | -      | 1258034  | 1258158 | 125              | 3 |
| 222          | Sinorhizobium medicae WSM419                 | NC_009636    | -      | 1258315  | 1258426 | 112              | 3 |
| 223          | Sinorhizobium medicae WSM419                 | NC_009636    | -      | 3590302  | 3590414 | 113              | 3 |
| 224          | Sinorhizobium meliloti 1021                  | NC_003037    | +      | 1220693  | 1220806 | 114              | 3 |
| 225          | Sinorhizobium meliloti 1021                  | NC_003047    | -      | 206865   | 206977  | 113              | 3 |
| 226          | Sinorhizobium meliloti 1021                  | NC_003047    | -      | 1667488  | 1667611 | 124              | 3 |
| 227          | Sinorhizobium meliloti 1021                  | NC_003047    | -      | 1667771  | 1667886 | 116              | 3 |
| 228          | Sinorhizobium meliloti 1021                  | NC_003078    | +      | 1605828  | 1605944 | 117              | 3 |
| 229          | Sinorhizobium meliloti 2011                  | NC_020527    | +      | 1219031  | 1219144 | 114              | 3 |
| 230          | Sinorhizobium meliloti 2011                  | NC_020528    | -      | 206866   | 206978  | 113              | 3 |
| 231          | Sinorhizobium meliloti 2011                  | NC_020528    | -      | 1667197  | 1667320 | 124              | 3 |
| 232          | Sinorhizobium meliloti 2011                  | NC_020528    | -      | 1667480  | 1667595 | 116              | 3 |

| # Cuckoo RNA | Species                                  | Replicon  | Strand | Position | Length  | # Cuckoo Modules |   |
|--------------|------------------------------------------|-----------|--------|----------|---------|------------------|---|
| 233          | <i>Sinorhizobium meliloti</i> 2011       | NC_020560 | +      | 1605843  | 1605959 | 117              | 3 |
| 234          | <i>Sinorhizobium meliloti</i> AK83       | NC_015590 | -      | 1369797  | 1369920 | 124              | 3 |
| 235          | <i>Sinorhizobium meliloti</i> AK83       | NC_015590 | -      | 1370080  | 1370195 | 116              | 3 |
| 236          | <i>Sinorhizobium meliloti</i> AK83       | NC_015590 | -      | 3626930  | 3627042 | 113              | 3 |
| 237          | <i>Sinorhizobium meliloti</i> AK83       | NC_015596 | -      | 574044   | 574160  | 117              | 3 |
| 238          | <i>Sinorhizobium meliloti</i> AK83       | NC_015597 | +      | 172172   | 172288  | 117              | 3 |
| 239          | <i>Sinorhizobium meliloti</i> BL225C     | NC_017322 | -      | 1231897  | 1232020 | 124              | 3 |
| 240          | <i>Sinorhizobium meliloti</i> BL225C     | NC_017322 | -      | 1232180  | 1232295 | 116              | 3 |
| 241          | <i>Sinorhizobium meliloti</i> BL225C     | NC_017322 | -      | 3479601  | 3479713 | 113              | 3 |
| 242          | <i>Sinorhizobium meliloti</i> BL225C     | NC_017323 | -      | 1376421  | 1376537 | 117              | 3 |
| 243          | <i>Sinorhizobium meliloti</i> GR4        | NC_019845 | -      | 201602   | 201714  | 113              | 3 |
| 244          | <i>Sinorhizobium meliloti</i> GR4        | NC_019845 | -      | 1637016  | 1637139 | 124              | 3 |
| 245          | <i>Sinorhizobium meliloti</i> GR4        | NC_019845 | -      | 1637299  | 1637414 | 116              | 3 |
| 246          | <i>Sinorhizobium meliloti</i> GR4        | NC_019849 | -      | 141338   | 141454  | 117              | 3 |
| 247          | <i>Sinorhizobium meliloti</i> Rm41       | NC_018683 | -      | 532712   | 532828  | 117              | 3 |
| 248          | <i>Sinorhizobium meliloti</i> Rm41       | NC_018700 | -      | 1308437  | 1308560 | 124              | 3 |
| 249          | <i>Sinorhizobium meliloti</i> Rm41       | NC_018700 | -      | 1308720  | 1308835 | 116              | 3 |
| 250          | <i>Sinorhizobium meliloti</i> Rm41       | NC_018700 | -      | 3485604  | 3485716 | 113              | 3 |
| 251          | <i>Sinorhizobium meliloti</i> Rm41       | NC_018701 | -      | 135189   | 135305  | 117              | 3 |
| 252          | <i>Sinorhizobium meliloti</i> SM11       | NC_017325 | +      | 2001062  | 2001177 | 116              | 3 |
| 253          | <i>Sinorhizobium meliloti</i> SM11       | NC_017325 | +      | 2001337  | 2001460 | 124              | 3 |
| 254          | <i>Sinorhizobium meliloti</i> SM11       | NC_017325 | -      | 3713437  | 3713549 | 113              | 3 |
| 255          | <i>Sinorhizobium meliloti</i> SM11       | NC_017326 | -      | 141142   | 141258  | 117              | 3 |
| 256          | <i>Agrobacterium fabrum</i> str. C58     | NC_003062 | +      | 109477   | 109645  | 169              | 4 |
| 257          | <i>Agrobacterium fabrum</i> str. C58     | NC_003063 | +      | 1831446  | 1831604 | 159              | 4 |
| 258          | <i>Agrobacterium radiobacter</i> K84     | NC_011983 | +      | 957654   | 957810  | 157              | 4 |
| 259          | <i>Agrobacterium radiobacter</i> K84     | NC_011983 | -      | 1921118  | 1921278 | 161              | 4 |
| 260          | <i>Agrobacterium radiobacter</i> K84     | NC_011987 | -      | 138502   | 138658  | 157              | 4 |
| 261          | <i>Agrobacterium</i> sp. H13-3           | NC_015508 | -      | 164001   | 164157  | 157              | 4 |
| 262          | <i>Agrobacterium</i> sp. H13-3           | NC_015508 | -      | 244664   | 244817  | 154              | 4 |
| 263          | <i>Agrobacterium vitis</i> S4            | NC_011988 | -      | 598435   | 598589  | 155              | 4 |
| 264          | <i>Agrobacterium vitis</i> S4            | NC_011988 | +      | 901000   | 901158  | 159              | 4 |
| 265          | <i>Agrobacterium vitis</i> S4            | NC_011989 | -      | 2793811  | 2793967 | 157              | 4 |
| 266          | <i>Brucella abortus</i> A13334           | NC_016795 | +      | 1527400  | 1527550 | 151              | 4 |
| 267          | <i>Brucella abortus</i> S19              | NC_010742 | -      | 888878   | 889028  | 151              | 4 |
| 268          | <i>Brucella abortus</i> bv. 1 str. 9-941 | NC_006932 | -      | 890577   | 890727  | 151              | 4 |
| 269          | <i>Brucella canis</i> ATCC 23365         | NC_010103 | -      | 867218   | 867368  | 151              | 4 |
| 270          | <i>Brucella canis</i> HSK A52141         | NC_016778 | +      | 185975   | 186125  | 151              | 4 |
| 271          | <i>Brucella melitensis</i> ATCC 23457    | NC_012441 | -      | 890344   | 890494  | 151              | 4 |

| # Cuckoo RNA | Species                                             | Replicon     | Strand | Position | Length  | # Cuckoo Modules |   |
|--------------|-----------------------------------------------------|--------------|--------|----------|---------|------------------|---|
| 272          | <i>Brucella melitensis</i> M28                      | NC_017244    | -      | 890289   | 890439  | 151              | 4 |
| 273          | <i>Brucella melitensis</i> M5-90                    | NC_017246    | -      | 890603   | 890753  | 151              | 4 |
| 274          | <i>Brucella melitensis</i> NI                       | NC_017248    | -      | 886872   | 887022  | 151              | 4 |
| 275          | <i>Brucella melitensis</i> biovar Abortus 2308      | NC_007618    | -      | 886855   | 887005  | 151              | 4 |
| 276          | <i>Brucella melitensis</i> bv. 1 str. 16M           | NC_003317    | +      | 1116628  | 1116778 | 151              | 4 |
| 277          | <i>Brucella microti</i> CCM 4915                    | NC_013119    | -      | 873050   | 873200  | 151              | 4 |
| 278          | <i>Brucella ovis</i> ATCC 25840                     | NC_009505    | -      | 895750   | 895898  | 149              | 4 |
| 279          | <i>Brucella pinnipedialis</i> B2/94                 | NC_015857    | -      | 897286   | 897436  | 151              | 4 |
| 280          | <i>Brucella suis</i> 1330                           | NC_004310    | -      | 868834   | 868984  | 151              | 4 |
| 281          | <i>Brucella suis</i> ATCC 23445                     | NC_010169    | -      | 888714   | 888864  | 151              | 4 |
| 282          | <i>Brucella suis</i> VBI22                          | NC_016797    | -      | 868801   | 868951  | 151              | 4 |
| 283          | <i>Oceanicola batsensis</i> HTCC2597                | AAMO01000006 | -      | 253121   | 253287  | 167              | 4 |
| 284          | <i>Ochrobactrum anthropi</i> ATCC 49188             | NC_009667    | +      | 2453942  | 2454091 | 150              | 4 |
| 285          | <i>Octadecabacter antarcticus</i> 307               | NC_020911    | -      | 1086719  | 1086896 | 178              | 4 |
| 286          | <i>Octadecabacter antarcticus</i> 307               | NC_020911    | -      | 1955581  | 1955758 | 178              | 4 |
| 287          | <i>Octadecabacter antarcticus</i> 307               | NC_020911    | -      | 1992343  | 1992520 | 178              | 4 |
| 288          | <i>Octadecabacter antarcticus</i> 307               | NC_020911    | +      | 3698830  | 3699006 | 177              | 4 |
| 289          | <i>Octadecabacter arcticus</i> 238                  | NC_020908    | -      | 670324   | 670504  | 181              | 4 |
| 290          | <i>Octadecabacter arcticus</i> 238                  | NC_020908    | +      | 2787008  | 2787181 | 174              | 4 |
| 291          | <i>Octadecabacter arcticus</i> 238                  | NC_020908    | +      | 3179240  | 3179417 | 178              | 4 |
| 292          | <i>Paracoccus aminophilus</i> JCM 7686              | NC_022041    | +      | 2655475  | 2655630 | 156              | 4 |
| 293          | <i>Paracoccus aminophilus</i> JCM 7686              | NC_022041    | +      | 2655655  | 2655805 | 151              | 4 |
| 294          | <i>Paracoccus denitrificans</i> PD1222              | NC_008686    | -      | 551203   | 551352  | 150              | 4 |
| 295          | <i>Polymorphum gilvum</i> SL003B-26A1               | NC_015259    | -      | 2332074  | 2332228 | 155              | 4 |
| 296          | <i>Pseudovibrio</i> sp. FO-BEG1                     | NC_016642    | +      | 3461369  | 3461532 | 164              | 4 |
| 297          | <i>Rhizobium etli</i> CFN 42                        | NC_004041    | +      | 77637    | 77794   | 158              | 4 |
| 298          | <i>Rhizobium etli</i> CFN 42                        | NC_007765    | -      | 443012   | 443161  | 150              | 4 |
| 299          | <i>Rhizobium etli</i> CIAT 652                      | NC_010994    | +      | 1173479  | 1173639 | 161              | 4 |
| 300          | <i>Rhizobium etli</i> CIAT 652                      | NC_010996    | +      | 112261   | 112418  | 158              | 4 |
| 301          | <i>Rhizobium etli</i> CIAT 652                      | NC_010998    | -      | 345903   | 346054  | 152              | 4 |
| 302          | <i>Rhizobium etli</i> bv. mimosae str. Mim1         | NC_021908    | -      | 449725   | 449873  | 149              | 4 |
| 303          | <i>Rhizobium leguminosarum</i> bv. trifolii WSM1325 | NC_012848    | +      | 265906   | 266069  | 164              | 4 |
| 304          | <i>Rhizobium leguminosarum</i> bv. trifolii WSM1325 | NC_012852    | +      | 119283   | 119433  | 151              | 4 |
| 305          | <i>Rhizobium leguminosarum</i> bv. trifolii WSM1325 | NC_012854    | -      | 2286     | 2441    | 156              | 4 |
| 306          | <i>Rhizobium leguminosarum</i> bv. trifolii WSM1325 | NC_012858    | +      | 28612    | 28768   | 157              | 4 |
| 307          | <i>Rhizobium leguminosarum</i> bv. trifolii WSM2304 | NC_011366    | +      | 50780    | 50933   | 154              | 4 |
| 308          | <i>Rhizobium leguminosarum</i> bv. trifolii WSM2304 | NC_011368    | +      | 607606   | 607759  | 154              | 4 |
| 309          | <i>Rhizobium leguminosarum</i> bv. viciae 3841      | NC_008384    | -      | 574470   | 574626  | 157              | 4 |
| 310          | <i>Rhizobium tropici</i> CIAT 899                   | NC_020062    | +      | 1038279  | 1038431 | 153              | 4 |

| # Cuckoo RNA | Species                              | Replicon     | Strand | Position | Length  | # Cuckoo Modules |   |
|--------------|--------------------------------------|--------------|--------|----------|---------|------------------|---|
| 311          | <i>Sinorhizobium medicae</i> WSM419  | NC_009621    | +      | 316270   | 316428  | 159              | 4 |
| 312          | <i>Sinorhizobium medicae</i> WSM419  | NC_009621    | +      | 338831   | 338988  | 158              | 4 |
| 313          | <i>Sinorhizobium meliloti</i> 1021   | NC_003037    | -      | 1328176  | 1328333 | 158              | 4 |
| 314          | <i>Sinorhizobium meliloti</i> 2011   | NC_020527    | -      | 1326513  | 1326670 | 158              | 4 |
| 315          | <i>Sinorhizobium meliloti</i> AK83   | NC_015591    | +      | 252033   | 252190  | 158              | 4 |
| 316          | <i>Sinorhizobium meliloti</i> BL225C | NC_017324    | -      | 293093   | 293250  | 158              | 4 |
| 317          | <i>Sinorhizobium meliloti</i> GR4    | NC_019848    | +      | 24154    | 24311   | 158              | 4 |
| 318          | <i>Sinorhizobium meliloti</i> Rm41   | NC_018683    | +      | 26268    | 26425   | 158              | 4 |
| 319          | <i>Sinorhizobium meliloti</i> SM11   | NC_017327    | +      | 29162    | 29319   | 158              | 4 |
| 320          | <i>Sulfitobacter</i> sp. EE-36       | AALV01000002 | +      | 574555   | 574727  | 173              | 4 |
| 321          | <i>Sulfitobacter</i> sp. NAS-14.1    | AALZ01000003 | +      | 477955   | 478127  | 173              | 4 |

**Table S2.** Synteny and genomic context of cuckoo RNAs.

| #<br>Cuckoo<br>RNA | LEFT FLANKING FEATURE |                    |      |          |         |             |           |                  | OVERLAPPING FEATURE                              |          |        |             |           |            |                      | RIGHT FLANKING FEATURE                       |         |             |           |                  |                                                             |                           |
|--------------------|-----------------------|--------------------|------|----------|---------|-------------|-----------|------------------|--------------------------------------------------|----------|--------|-------------|-----------|------------|----------------------|----------------------------------------------|---------|-------------|-----------|------------------|-------------------------------------------------------------|---------------------------|
|                    | CIN                   | Family             | OG   | Position | Strand  | Region type | Locus tag | Product          | OG                                               | Position | Strand | Region type | Locus tag | Product    | OG                   | Position                                     | Strand  | Region type | Locus tag | Product          |                                                             |                           |
| 1                  | CIN1                  | Brucellaceae       | OG1  | 653418   | 653564  | -           | CDS       | BAA13334_I101032 | hypothetical protein                             |          |        |             |           |            | OG15                 | 652016                                       | 653245  | +           | CDS       | BAA13334_I101030 | flavorubredoxin reductase                                   |                           |
| 2                  | CIN1                  | Brucellaceae       | OG1  | 502376   | 502534  | -           | CDS       | BAb519_I104820   | hypothetical protein                             |          |        |             |           |            | OG15                 | 500974                                       | 502203  | +           | CDS       | BAb519_I104810   | pyridine nucleotide-disulfide oxidoreductase family protein |                           |
| 3                  | CIN1                  | Brucellaceae       | OG1  | 503172   | 503330  | -           | CDS       | BruAb2_0503      | hypothetical protein                             |          |        |             |           |            | OG15                 | 501770                                       | 502999  | +           | CDS       | BruAb2_0502      | pyridine nucleotide-disulfide oxidoreductase                |                           |
| 4                  | CIN6                  | Brucellaceae       | OG14 | 448555   | 449274  | +           | CDS       | BCAN_B0464       | TetR family transcriptional regulator            | 448064   | 448252 | +           | CDS       | BCAN_B0463 | hypothetical protein | OG13                                         | 446920  | 447978      | +         | CDS              | BCAN_B0462                                                  | hypothetical protein      |
| 5                  | CIN6                  | Brucellaceae       | OG14 | 346454   | 347173  | -           | CDS       | BCA52141_I10534  | regulatory protein LysR                          |          |        |             |           |            | OG13                 | 347750                                       | 348814  | -           | CDS       | BCA52141_I10535  | hypothetical protein                                        |                           |
| 6                  | CIN1                  | Brucellaceae       | OG1  | 692918   | 693076  | +           | CDS       | BMEA_B0706       | hypothetical protein                             |          |        |             |           |            |                      | 694594                                       | 695436  | -           | CDS       | BMEA_B0708       | RpiR family transcriptional regulator                       |                           |
| 7                  | CIN1                  | Brucellaceae       | OG1  | 693002   | 693157  | +           | CDS       | BM28_B0696       | hypothetical protein                             | OG15     | 693277 | 694563      | -         | CDS        | BM28_B0697           | pyridine nucleotide-disulfide oxidoreductase | 694675  | 695517      | -         | CDS              | BM28_B0698                                                  | transcriptional regulator |
| 8                  | CIN1                  | Brucellaceae       | OG1  | 693194   | 693340  | +           | CDS       | BM590_B0694      | hypothetical protein                             |          | 693374 | 694747      | -         | CDS        | BM590_B0695          | rhodocoxin reductase                         | 694859  | 695701      | -         | CDS              | BM590_B0696                                                 | transcriptional regulator |
| 9                  | CIN1                  | Brucellaceae       | OG1  | 684687   | 684833  | +           | CDS       | BMNI_I10677      | hypothetical protein                             |          | 684901 | 686238      | -         | CDS        | BMNI_I10678          | rhodocoxin reductase                         | 686350  | 687192      | -         | CDS              | BMNI_I10679                                                 | transcriptional regulator |
| 10                 | CIN1                  | Brucellaceae       | OG1  | 503160   | 503318  | -           | CDS       | BAB2_0512        | hypothetical protein                             |          |        |             |           |            | OG15                 | 501758                                       | 502987  | +           | CDS       | BAB2_0511        | pyridine nucleotide-disulfide oxidoreductase class-II       |                           |
| 11                 | CIN6                  | Brucellaceae       | OG14 | 765708   | 766427  | -           | CDS       | BAB2_0774        | transcriptional regulator TetR                   | 766730   | 766918 | -           | CDS       | BAB2_0775  | hypothetical protein | OG13                                         | 767004  | 768062      | -         | CDS              | BAB2_0776                                                   | hypothetical protein      |
| 12                 |                       | Brucellaceae       |      | 584622   | 585725  | +           | CDS       | BMEI10559        | glycine cleavage system aminomethyltransferase T |          |        |             |           |            |                      | 583439                                       | 583645  | +           | CDS       | BMEI10558        | rhodocoxin reductase                                        |                           |
| 13                 | CIN6                  | Brucellaceae       | OG14 | 839700   | 840419  | -           | CDS       | BMEI10804        | TETR family transcriptional regulator            | 840722   | 841036 | -           | CDS       | BMEI10805  | hypothetical protein | OG13                                         | 840996  | 842054      | -         | CDS              | BMEI10806                                                   | transmembrane protein     |
| 14                 | CIN6                  | Brucellaceae       | OG14 | 449948   | 450667  | +           | CDS       | BMI_I1459        | Tetr family transcriptional regulator            | 449457   | 449645 | +           | CDS       | BMI_I1458  | hypothetical protein | OG13                                         | 448313  | 449371      | +         | CDS              | BMI_I1457                                                   | hypothetical protein      |
| 15                 | CIN1                  | Brucellaceae       | OG1  | 714754   | 714912  | +           | CDS       | BMI_I1721        | hypothetical protein                             |          |        |             |           |            | OG15                 | 715085                                       | 716314  | -           | CDS       | BMI_I1722        | pyridine nucleotide-disulfide oxidoreductase family protein |                           |
| 16                 | CIN1                  | Brucellaceae       | OG1  | 715043   | 715201  | +           | CDS       | BOV_A0682        | hypothetical protein                             |          |        |             |           |            | OG15                 | 715378                                       | 716607  | -           | CDS       | BOV_A0683        | pyridine nucleotide-disulfide oxidoreductase family protein |                           |
| 17                 | CIN1                  | Brucellaceae       | OG1  | 769534   | 769692  | +           | CDS       | BPI_I1781        | hypothetical protein                             |          |        |             |           |            | OG15                 | 769871                                       | 771100  | -           | CDS       | BPI_I1782        | pyridine nucleotide-disulfide oxidoreductase family protein |                           |
| 18                 | CIN1                  | Brucellaceae       | OG1  | 713813   | 713971  | +           | CDS       | BS1330_I10721    | hypothetical protein                             |          |        |             |           |            | OG15                 | 714153                                       | 715382  | -           | CDS       | BS1330_I10722    | pyridine nucleotide-disulfide oxidoreductase family protein |                           |
| 19                 | CIN1                  | Brucellaceae       | OG1  | 701709   | 701867  | +           | CDS       | BSUIS_B0720      | hypothetical protein                             |          |        |             |           |            | OG15                 | 702039                                       | 703268  | -           | CDS       | BSUIS_B0721      | hypothetical protein                                        |                           |
| 20                 | CIN1                  | Brucellaceae       | OG1  | 713863   | 714021  | +           | CDS       | BSVBI22_B0720    | hypothetical protein                             |          |        |             |           |            | OG15                 | 714203                                       | 715432  | -           | CDS       | BSVBI22_B0721    | pyridine nucleotide-disulfide oxidoreductase family protein |                           |
| 21                 |                       | Phyllobacteriaceae |      | 214571   | 215014  | +           | CDS       | Meso_0172        | phasin                                           |          |        |             |           |            |                      | 215234                                       | 215310  | +           | tRNA      | Meso_R0004       | tRNA-His                                                    |                           |
| 22                 |                       | Phyllobacteriaceae |      | 247150   | 247416  | +           | CDS       | Meso_0212        | hypothetical protein                             |          |        |             |           |            |                      | 247697                                       | 247972  | +           | CDS       | Meso_0213        | hypothetical protein                                        |                           |
| 23                 | CIN1                  | Rhodobacteraceae   |      | 2628776  | 2629864 | -           | CDS       | Dshi_2476        | hypothetical protein                             |          |        |             |           |            | OG2                  | 2630248                                      | 2630712 | -           | CDS       | Dshi_2477        | putative leucine-responsive regulatory protein              |                           |
| 24                 | CIN1                  | Rhodobacteraceae   | OG1  | 2789478  | 2789852 | +           | CDS       | Jann_2773        | hypothetical protein                             |          |        |             |           |            | OG2                  | 2790224                                      | 2790676 | -           | CDS       | Jann_2774        | AsnC family transcriptional regulator                       |                           |
| 25                 | CIN1                  | Rhodobacteraceae   | OG1  | 2789478  | 2789852 | +           | CDS       | Jann_2773        | hypothetical protein                             |          |        |             |           |            | OG2                  | 2790224                                      | 2790676 | -           | CDS       | Jann_2774        | AsnC family transcriptional regulator                       |                           |
| 26                 | CIN1                  | Rhodobacteraceae   | OG1  | 2789478  | 2789852 | +           | CDS       | Jann_2773        | hypothetical protein                             |          |        |             |           |            | OG2                  | 2790224                                      | 2790676 | -           | CDS       | Jann_2774        | AsnC family transcriptional regulator                       |                           |
| 27                 |                       | Rhodobacteraceae   |      |          |         |             |           |                  |                                                  |          |        |             |           |            |                      |                                              |         |             |           |                  |                                                             |                           |
| 28                 |                       | Rhodobacteraceae   |      |          |         |             |           |                  |                                                  |          |        |             |           |            |                      |                                              |         |             |           |                  |                                                             |                           |
| 29                 | CIN1                  | Rhodobacteraceae   | OG1  | 20582    | 20797   | +           | CDS       | SKA53_07326      | hypothetical protein                             |          |        |             |           |            | OG2                  | 21202                                        | 21663   | -           | CDS       | SKA53_07331      | transcriptional regulator, AsnC family                      |                           |
| 30                 | CIN1                  | Rhodobacteraceae   | OG1  | 20582    | 20797   | +           | CDS       | SKA53_07326      | hypothetical protein                             |          |        |             |           |            | OG2                  | 21202                                        | 21663   | -           | CDS       | SKA53_07331      | transcriptional regulator, AsnC family                      |                           |

| #<br>Cuckoo<br>RNA | LEFT FLANKING FEATURE |                  |     |          |         |             |           |                   |                                 | OVERLAPPING FEATURE |         |             |           |         |                   | RIGHT FLANKING FEATURE                         |        |             |           |         |  |
|--------------------|-----------------------|------------------|-----|----------|---------|-------------|-----------|-------------------|---------------------------------|---------------------|---------|-------------|-----------|---------|-------------------|------------------------------------------------|--------|-------------|-----------|---------|--|
|                    | CIN                   | Family           | OG  | Position | Strand  | Region type | Locus tag | Product           | OG                              | Position            | Strand  | Region type | Locus tag | Product | OG                | Position                                       | Strand | Region type | Locus tag | Product |  |
| 31                 | CIN1                  | Rhodobacteraceae | OG1 | 253412   | 253627  | -           | CDS       | OB2597_16115      | hypothetical protein            | OG17                | 250382  | 252970      | +         | CDS     | OB2597_16110      | Putative uvrD/DNA Helicase II                  |        |             |           |         |  |
| 32                 |                       | Rhodobacteraceae |     | 74835    | 75470   | +           | CDS       | OB2597_18721      | hypothetical protein            |                     | 76073   | 80383       | +         | CDS     | OB2597_18726      | putative methylase/helicase                    |        |             |           |         |  |
| 33                 | CIN1                  | Rhodobacteraceae | OG1 | 158763   | 158990  | +           | CDS       | OG2516_05838      | hypothetical protein            |                     | 159616  | 160842      | -         | CDS     | OG2516_05843      | heat shock protein, Hsp70 family protein       |        |             |           |         |  |
| 34                 | CIN1                  | Rhodobacteraceae | OG1 | 158763   | 158990  | +           | CDS       | OG2516_05838      | hypothetical protein            |                     | 159616  | 160842      | -         | CDS     | OG2516_05843      | heat shock protein, Hsp70 family protein       |        |             |           |         |  |
| 35                 | CIN1                  | Rhodobacteraceae | OG1 | 158763   | 158990  | +           | CDS       | OG2516_05838      | hypothetical protein            |                     | 159616  | 160842      | -         | CDS     | OG2516_05843      | heat shock protein, Hsp70 family protein       |        |             |           |         |  |
| 36                 | CIN1                  | Rhodobacteraceae | OG1 | 158763   | 158990  | +           | CDS       | OG2516_05838      | hypothetical protein            |                     | 159616  | 160842      | -         | CDS     | OG2516_05843      | heat shock protein, Hsp70 family protein       |        |             |           |         |  |
| 37                 | CIN1                  | Rhodobacteraceae |     | 1186838  | 1187056 | -           | CDS       | OAN307_c11810     | hypothetical protein            | OG2                 | 1186093 | 1186545     | +         | CDS     | OAN307_c11800     | putative AsnC family transcriptional regulator |        |             |           |         |  |
| 38                 |                       | Rhodobacteraceae |     | 1586475  | 1586957 | +           | CDS       | OAN307_c15980     | hypothetical protein            |                     | 1587107 | 1587649     | +         | CDS     | OAN307_c15990     | putative PHB synthesis repressor protein       |        |             |           |         |  |
| 39                 |                       | Rhodobacteraceae |     | 725064   | 725513  | +           | CDS       | OA238_c06950      | hypothetical protein            |                     | 725663  | 726205      | +         | CDS     | OA238_c06960      | putative PHB synthesis repressor protein       |        |             |           |         |  |
| 40                 | CIN1                  | Rhodobacteraceae |     | 805909   | 806127  | -           | CDS       | OA238_c07730      | hypothetical protein            | OG2                 | 805130  | 805633      | +         | CDS     | OA238_c07720      | putative AsnC family transcriptional regulator |        |             |           |         |  |
| 41                 |                       | Rhodobacteraceae |     | 2228456  | 2229466 | -           | CDS       | OA238_c21140      | putative IS481 family integrase |                     | 2230121 | 2230318     | -         | CDS     | OA238_c21150      | hypothetical protein                           |        |             |           |         |  |
| 42                 | CIN1                  | Rhodobacteraceae | OG1 | 551716   | 552015  | -           | CDS       | Pden_0580         | hypothetical protein            |                     | 550394  | 551167      | -         | CDS     | Pden_0579         | hypothetical protein                           |        |             |           |         |  |
| 43                 | CIN1                  | Rhodobacteraceae | OG1 | 551716   | 552015  | -           | CDS       | Pden_0580         | hypothetical protein            |                     | 550394  | 551167      | -         | CDS     | Pden_0579         | hypothetical protein                           |        |             |           |         |  |
| 44                 | CIN1                  | Rhodobacteraceae | OG1 | 551716   | 552015  | -           | CDS       | Pden_0580         | hypothetical protein            |                     | 550394  | 551167      | -         | CDS     | Pden_0579         | hypothetical protein                           |        |             |           |         |  |
| 45                 | CIN1                  | Rhodobacteraceae | OG1 | 551716   | 552015  | -           | CDS       | Pden_0580         | hypothetical protein            |                     | 550394  | 551167      | -         | CDS     | Pden_0579         | hypothetical protein                           |        |             |           |         |  |
| 46                 |                       | Rhodobiaceae     |     | 2346100  | 2346174 | +           | tRNA      | Plav_R0027        | tRNA-Glu                        |                     | 2343868 | 2345316     | -         | CDS     | Plav_2164         | RluA family pseudouridine synthase             |        |             |           |         |  |
| 47                 | CIN1                  | Rhodobacteraceae | OG1 | 1028770  | 1028988 | -           | CDS       | PGA2_c09350       | hypothetical protein            | OG17                | 1026054 | 1028414     | +         | CDS     | PGA2_c09340       | DNA helicase II UvrD                           |        |             |           |         |  |
| 48                 | CIN1                  | Rhodobacteraceae | OG1 | 1028770  | 1028988 | -           | CDS       | PGA2_c09350       | hypothetical protein            | OG17                | 1026054 | 1028414     | +         | CDS     | PGA2_c09340       | DNA helicase II UvrD                           |        |             |           |         |  |
| 49                 | CIN1                  | Rhodobacteraceae | OG1 | 969561   | 969779  | -           | CDS       | PGA1_c09460       | hypothetical protein            | OG17                | 966842  | 969205      | +         | CDS     | PGA1_c09450       | DNA helicase II UvrD                           |        |             |           |         |  |
| 50                 | CIN1                  | Rhodobacteraceae | OG1 | 969561   | 969779  | -           | CDS       | PGA1_c09460       | hypothetical protein            | OG17                | 966842  | 969205      | +         | CDS     | PGA1_c09450       | DNA helicase II UvrD                           |        |             |           |         |  |
| 51                 |                       | Rhizobiaceae     |     | 27340    | 27705   | -           | CDS       | RHECIAT_PC0000026 | hypothetical protein            |                     | 28423   | 28803       | +         | CDS     | RHECIAT_PC0000027 | dependent formaldehyde-activating protein      |        |             |           |         |  |
| 52                 |                       | Rhizobiaceae     |     | 2609131  | 2610966 | -           | CDS       | Rleg2_2571        | peptidase M24                   |                     | 2611835 | 2612713     | -         | CDS     | Rleg2_2573        | 50S ribosomal protein L11 methyltransferase    |        |             |           |         |  |
| 53                 | CIN1                  | Rhodobacteraceae | OG1 | 2557251  | 2557454 | +           | CDS       | RCAP_rcc02385     | hypothetical protein            |                     | 2557937 | 2558734     | +         | CDS     | RCAP_rcc02386     | hypothetical protein                           |        |             |           |         |  |
| 54                 | CIN1                  | Rhodobacteraceae | OG1 | 2557251  | 2557454 | +           | CDS       | RCAP_rcc02385     | hypothetical protein            |                     | 2557937 | 2558734     | +         | CDS     | RCAP_rcc02386     | hypothetical protein                           |        |             |           |         |  |
| 55                 | CIN1                  | Rhodobacteraceae | OG1 | 2557251  | 2557454 | +           | CDS       | RCAP_rcc02385     | hypothetical protein            |                     | 2557937 | 2558734     | +         | CDS     | RCAP_rcc02386     | hypothetical protein                           |        |             |           |         |  |
| 56                 | CIN1                  | Rhodobacteraceae | OG1 | 2557251  | 2557454 | +           | CDS       | RCAP_rcc02385     | hypothetical protein            |                     | 2557937 | 2558734     | +         | CDS     | RCAP_rcc02386     | hypothetical protein                           |        |             |           |         |  |
| 57                 | CIN1                  | Rhodobacteraceae | OG1 | 692464   | 692679  | -           | CDS       | RSP_6037          | hypothetical protein            | OG18                | 690398  | 691543      | -         | CDS     | RSP_2091          | benzoate transporter, BenE                     |        |             |           |         |  |
| 58                 | CIN1                  | Rhodobacteraceae | OG1 | 692464   | 692679  | -           | CDS       | RSP_6037          | hypothetical protein            | OG18                | 690398  | 691543      | -         | CDS     | RSP_2091          | benzoate transporter, BenE                     |        |             |           |         |  |
| 59                 | CIN1                  | Rhodobacteraceae | OG1 | 692464   | 692679  | -           | CDS       | RSP_6037          | hypothetical protein            | OG18                | 690398  | 691543      | -         | CDS     | RSP_2091          | benzoate transporter, BenE                     |        |             |           |         |  |
| 60                 | CIN1                  | Rhodobacteraceae | OG1 | 692464   | 692679  | -           | CDS       | RSP_6037          | hypothetical protein            | OG18                | 690398  | 691543      | -         | CDS     | RSP_2091          | benzoate transporter, BenE                     |        |             |           |         |  |
| 61                 | CIN1                  | Rhodobacteraceae | OG1 | 692464   | 692679  | -           | CDS       | RSP_6037          | hypothetical protein            | OG18                | 690398  | 691543      | -         | CDS     | RSP_2091          | benzoate transporter, BenE                     |        |             |           |         |  |
| 62                 | CIN1                  | Rhodobacteraceae | OG1 | 692464   | 692679  | -           | CDS       | RSP_6037          | hypothetical protein            | OG18                | 690398  | 691543      | -         | CDS     | RSP_2091          | benzoate transporter, BenE                     |        |             |           |         |  |
| 63                 | CIN1                  | Rhodobacteraceae | OG1 | 692464   | 692679  | -           | CDS       | RSP_6037          | hypothetical protein            | OG18                | 690398  | 691543      | -         | CDS     | RSP_2091          | benzoate transporter, BenE                     |        |             |           |         |  |
| 64                 | CIN1                  | Rhodobacteraceae | OG1 | 687212   | 687427  | -           | CDS       | Rsph17025_0680    | hypothetical protein            | OG18                | 685502  | 686647      | -         | CDS     | Rsph17025_0679    | benzoate transporter                           |        |             |           |         |  |
| 65                 | CIN1                  | Rhodobacteraceae | OG1 | 687212   | 687427  | -           | CDS       | Rsph17025_0680    | hypothetical protein            | OG18                | 685502  | 686647      | -         | CDS     | Rsph17025_0679    | benzoate transporter                           |        |             |           |         |  |
| 66                 | CIN1                  | Rhodobacteraceae | OG1 | 687212   | 687427  | -           | CDS       | Rsph17025_0680    | hypothetical protein            | OG18                | 685502  | 686647      | -         | CDS     | Rsph17025_0679    | benzoate transporter                           |        |             |           |         |  |
| 67                 | CIN1                  | Rhodobacteraceae | OG1 | 687212   | 687427  | -           | CDS       | Rsph17025_0680    | hypothetical protein            | OG18                | 685502  | 686647      | -         | CDS     | Rsph17025_0679    | benzoate transporter                           |        |             |           |         |  |
| 68                 | CIN1                  | Rhodobacteraceae | OG1 | 776187   | 776402  | -           | CDS       | Rsph17029_0768    | hypothetical protein            | OG18                | 773895  | 775040      | -         | CDS     | Rsph17029_0767    | benzoate transporter                           |        |             |           |         |  |
| 69                 | CIN1                  | Rhodobacteraceae | OG1 | 776187   | 776402  | -           | CDS       | Rsph17029_0768    | hypothetical protein            | OG18                | 773895  | 775040      | -         | CDS     | Rsph17029_0767    | benzoate transporter                           |        |             |           |         |  |
| 70                 | CIN1                  | Rhodobacteraceae | OG1 | 776187   | 776402  | -           | CDS       | Rsph17029_0768    | hypothetical protein            | OG18                | 773895  | 775040      | -         | CDS     | Rsph17029_0767    | benzoate transporter                           |        |             |           |         |  |
| 71                 | CIN1                  | Rhodobacteraceae | OG1 | 776187   | 776402  | -           | CDS       | Rsph17029_0768    | hypothetical protein            | OG18                | 773895  | 775040      | -         | CDS     | Rsph17029_0767    | benzoate transporter                           |        |             |           |         |  |



| # Cuckoo RNA | LEFT FLANKING FEATURE |                  |      |          |         |             |           |                  | OVERLAPPING FEATURE                                                    |          |         |             |           |         | RIGHT FLANKING FEATURE |                                                 |        |             |           |         |
|--------------|-----------------------|------------------|------|----------|---------|-------------|-----------|------------------|------------------------------------------------------------------------|----------|---------|-------------|-----------|---------|------------------------|-------------------------------------------------|--------|-------------|-----------|---------|
|              | CIN                   | Family           | OG   | Position | Strand  | Region type | Locus tag | Product          | OG                                                                     | Position | Strand  | Region type | Locus tag | Product | OG                     | Position                                        | Strand | Region type | Locus tag | Product |
| 72           | CIN1                  | Rhodobacteraceae | OG1  | 776187   | 776402  | -           | CDS       | Rsph17029_0768   | hypothetical protein                                                   | OG18     | 773895  | 775040      | -         | CDS     | Rsph17029_0767         | benzoate transporter                            |        |             |           |         |
| 73           | CIN1                  | Rhodobacteraceae | OG1  | 776187   | 776402  | -           | CDS       | Rsph17029_0768   | hypothetical protein                                                   | OG18     | 773895  | 775040      | -         | CDS     | Rsph17029_0767         | benzoate transporter                            |        |             |           |         |
| 74           | CIN1                  | Rhodobacteraceae | OG1  | 776187   | 776402  | -           | CDS       | Rsph17029_0768   | hypothetical protein                                                   | OG18     | 773895  | 775040      | -         | CDS     | Rsph17029_0767         | benzoate transporter                            |        |             |           |         |
| 75           | CIN1                  | Rhodobacteraceae | OG1  | 776187   | 776402  | -           | CDS       | Rsph17029_0768   | hypothetical protein                                                   | OG18     | 773895  | 775040      | -         | CDS     | Rsph17029_0767         | benzoate transporter                            |        |             |           |         |
| 76           | CIN1                  | Rhodobacteraceae | OG1  | 776187   | 776402  | -           | CDS       | Rsph17029_0768   | hypothetical protein                                                   | OG18     | 773895  | 775040      | -         | CDS     | Rsph17029_0767         | benzoate transporter                            |        |             |           |         |
| 77           | CIN1                  | Rhodobacteraceae | OG1  | 389295   | 389447  | -           | CDS       | RSKD131_0402     | hypothetical protein                                                   | OG18     | 387228  | 388373      | -         | CDS     | RSKD131_0401           | Benzoate transporter                            |        |             |           |         |
| 78           | CIN1                  | Rhodobacteraceae | OG1  | 389295   | 389447  | -           | CDS       | RSKD131_0402     | hypothetical protein                                                   | OG18     | 387228  | 388373      | -         | CDS     | RSKD131_0401           | Benzoate transporter                            |        |             |           |         |
| 79           | CIN1                  | Rhodobacteraceae | OG1  | 389295   | 389447  | -           | CDS       | RSKD131_0402     | hypothetical protein                                                   | OG18     | 387228  | 388373      | -         | CDS     | RSKD131_0401           | Benzoate transporter                            |        |             |           |         |
| 80           | CIN1                  | Rhodobacteraceae | OG1  | 389295   | 389447  | -           | CDS       | RSKD131_0402     | hypothetical protein                                                   | OG18     | 387228  | 388373      | -         | CDS     | RSKD131_0401           | Benzoate transporter                            |        |             |           |         |
| 81           | CIN1                  | Rhodobacteraceae | OG1  | 389295   | 389447  | -           | CDS       | RSKD131_0402     | hypothetical protein                                                   | OG18     | 387228  | 388373      | -         | CDS     | RSKD131_0401           | Benzoate transporter                            |        |             |           |         |
| 82           | CIN1                  | Rhodobacteraceae | OG1  | 389295   | 389447  | -           | CDS       | RSKD131_0402     | hypothetical protein                                                   | OG18     | 387228  | 388373      | -         | CDS     | RSKD131_0401           | Benzoate transporter                            |        |             |           |         |
| 83           | CIN1                  | Rhodobacteraceae | OG1  | 389295   | 389447  | -           | CDS       | RSKD131_0402     | hypothetical protein                                                   | OG18     | 387228  | 388373      | -         | CDS     | RSKD131_0401           | Benzoate transporter                            |        |             |           |         |
| 84           | CIN1                  | Rhodobacteraceae | OG1  | 3236591  | 3236827 | +           | CDS       | RD1_3372         | hypothetical protein                                                   | OG18     | 3237115 | 3237792     | -         | CDS     | RD1_3373               | hypothetical protein                            |        |             |           |         |
| 85           | CIN1                  | Rhodobacteraceae | OG1  | 3236591  | 3236827 | +           | CDS       | RD1_3372         | hypothetical protein                                                   | OG18     | 3237115 | 3237792     | -         | CDS     | RD1_3373               | hypothetical protein                            |        |             |           |         |
| 86           | CIN1                  | Rhodobacteraceae | OG1  | 2650174  | 2651247 | -           | CDS       | RLO149_c025820   | hypothetical protein                                                   | OG1      | 2651466 | 2651705     | +         | CDS     | RLO149_c025830         | hypothetical protein                            |        |             |           |         |
| 87           | CIN1                  | Rhodobacteraceae | OG1  | 2651466  | 2651705 | +           | CDS       | RLO149_c025830   | hypothetical protein                                                   | OG1      | 2651466 | 2651705     | +         | CDS     | RLO149_c025830         | hypothetical protein                            |        |             |           |         |
| 88           | CIN1                  | Rhodobacteraceae | OG1  | 1448664  | 1448888 | -           | CDS       | ISM_07085        | hypothetical protein                                                   | OG18     | 1447445 | 1448407     | +         | CDS     | ISM_07080              | Sugar phosphate Isomerase                       |        |             |           |         |
| 89           | CIN1                  | Rhodobacteraceae | OG1  | 1795806  | 1796783 | -           | CDS       | ISM_08740        | hypothetical protein                                                   | OG18     | 1794506 | 1795438     | -         | CDS     | ISM_08735              | Putative transporter, AEC family protein        |        |             |           |         |
| 90           | CIN1                  | Rhodobacteraceae | OG1  | 61009    | 61233   | -           | CDS       | ROS217_16875     | hypothetical protein                                                   | OG18     | 60216   | 60506       | +         | CDS     | ROS217_16870           | hypothetical protein                            |        |             |           |         |
| 91           | CIN1                  | Rhodobacteraceae | OG1  | 61009    | 61233   | -           | CDS       | ROS217_16875     | hypothetical protein                                                   | OG18     | 60216   | 60506       | +         | CDS     | ROS217_16870           | hypothetical protein                            |        |             |           |         |
| 92           | CIN1                  | Rhodobacteraceae | OG1  | 1229631  | 1229855 | -           | CDS       | SPO1177          | hypothetical protein                                                   | OG18     | 1228427 | 1229203     | -         | CDS     | SPO1176                | Ser/Thr protein phosphatase                     |        |             |           |         |
| 93           | CIN1                  | Rhodobacteraceae | OG1  | 1229631  | 1229855 | -           | CDS       | SPO1177          | hypothetical protein                                                   | OG18     | 1228427 | 1229203     | -         | CDS     | SPO1176                | Ser/Thr protein phosphatase                     |        |             |           |         |
| 94           | CIN1                  | Rhodobacteraceae | OG1  | 1229631  | 1229855 | -           | CDS       | SPO1177          | hypothetical protein                                                   | OG18     | 1228427 | 1229203     | -         | CDS     | SPO1176                | Ser/Thr protein phosphatase                     |        |             |           |         |
| 95           | CIN1                  | Rhodobacteraceae | OG1  | 2128003  | 2128224 | +           | CDS       | TM1040_2023      | hypothetical protein                                                   | OG17     | 2128764 | 2131208     | -         | CDS     | TM1040_2024            | ATP-dependent DNA helicase Rep                  |        |             |           |         |
| 96           | CIN1                  | Rhodobacteraceae | OG1  | 2128003  | 2128224 | +           | CDS       | TM1040_2023      | hypothetical protein                                                   | OG17     | 2128764 | 2131208     | -         | CDS     | TM1040_2024            | ATP-dependent DNA helicase Rep                  |        |             |           |         |
| 97           | CIN1                  | Rhodobacteraceae | OG1  | 289036   | 289251  | -           | CDS       | SSE37_24084      | hypothetical protein                                                   | OG18     | 285278  | 288367      | -         | CDS     | SSE37_24079            | valyl-tRNA synthetase                           |        |             |           |         |
| 98           | CIN1                  | Rhodobacteraceae | OG1  | 289036   | 289251  | -           | CDS       | SSE37_24084      | hypothetical protein                                                   | OG18     | 285278  | 288367      | -         | CDS     | SSE37_24079            | valyl-tRNA synthetase                           |        |             |           |         |
| 99           | CIN1                  | Rhodobacteraceae | OG1  | 289036   | 289251  | -           | CDS       | SSE37_24084      | hypothetical protein                                                   | OG18     | 285278  | 288367      | -         | CDS     | SSE37_24079            | valyl-tRNA synthetase                           |        |             |           |         |
| 100          | CIN1                  | Rhodobacteraceae | OG1  | 1975071  | 1975880 | -           | CDS       | Smed_1916        | hypothetical protein                                                   | OG18     | 1974057 | 1974461     | -         | CDS     | Smed_1915              | hypothetical protein                            |        |             |           |         |
| 101          | CIN1                  | Rhodobacteraceae | OG1  | 572745   | 573815  | -           | CDS       | EE36_17022       | Putative Mrp (Multidrug resistance-associated proteins) family protein | OG1      | 574053  | 574133      | -         | CDS     | EE36_17027             | hypothetical protein                            |        |             |           |         |
| 102          | CIN1                  | Rhodobacteraceae | OG1  | 476145   | 477215  | -           | CDS       | NAS141_07243     | Putative Mrp (Multidrug resistance-associated proteins) family protein | OG1      | 477730  | 477942      | +         | CDS     | NAS141_07248           | hypothetical protein                            |        |             |           |         |
| 103          | CIN1                  | Rhodobacteraceae | OG1  | 13199    | 14455   | +           | CDS       | NAS141_04568     | putative sigma-54-dependent transcriptional regulator                  | OG18     | 10870   | 12810       | +         | CDS     | NAS141_04563           | type IV secretion system coupling protein       |        |             |           |         |
| 104          | CIN1                  | Rhodobacteraceae | OG1  | 2565184  | 2565402 | +           | CDS       | Gal_02545        | putative small protein                                                 | OG17     | 2565748 | 2568159     | -         | CDS     | Gal_02546              | Superfamily I DNA and RNA helicase              |        |             |           |         |
| 105          | CIN1                  | Rhodobacteraceae | OG1  | 2565184  | 2565402 | +           | CDS       | Gal_02545        | putative small protein                                                 | OG17     | 2565748 | 2568159     | -         | CDS     | Gal_02546              | Superfamily I DNA and RNA helicase              |        |             |           |         |
| 106          | CIN1                  | Rhodobacteraceae | OG1  | 1229247  | 1230176 | +           | CDS       | Atu4110          | serine dehydrogenase                                                   | OG18     | 1230719 | 1231906     | +         | CDS     | Atu4112                | proline dipeptidase                             |        |             |           |         |
| 107          | CIN5                  | Rhizobiaceae     | OG3  | 596785   | 597666  | +           | CDS       | Arad_0725        | oxidoreductase                                                         | OG4      | 598187  | 599503      | +         | CDS     | Arad_0727              | hypothetical protein                            |        |             |           |         |
| 108          | CIN1                  | Rhizobiaceae     | OG1  | 1693731  | 1694870 | +           | CDS       | Arad_2145        | hypothetical protein                                                   | OG1      | 1692677 | 1692823     | -         | CDS     | Arad_2144              | hypothetical protein                            |        |             |           |         |
| 109          | CIN2                  | Rhizobiaceae     | OG6  | 3946044  | 3946844 | +           | CDS       | Arad_4883        | molybdate ABC transporter substrate-binding protein                    | OG5      | 3944888 | 3945469     | +         | CDS     | Arad_4880              | nicotinic acid mononucleotide adenyltransferase |        |             |           |         |
| 110          | CIN1                  | Rhizobiaceae     | OG1  | 108794   | 109252  | -           | CDS       | AGROH133_02958   | hypothetical protein                                                   | OG18     | 109733  | 109942      | +         | CDS     | AGROH133_02961         | cold shock protein                              |        |             |           |         |
| 111          | CIN1                  | Rhizobiaceae     | OG1  | 1614286  | 1615035 | +           | CDS       | AGROH133_12938   | serine dehydrogenase                                                   | OG18     | 1615591 | 1616778     | +         | CDS     | AGROH133_12940         | proline dipeptidase                             |        |             |           |         |
| 112          | CIN1                  | Rhizobiaceae     | OG1  | 6113     | 7192    | +           | CDS       | Avi_9007         | two component sensor kinase                                            | OG18     | 7500    | 8633        | -         | CDS     | Avi_9008               | phage integrase family protein                  |        |             |           |         |
| 113          | CIN1                  | Rhizobiaceae     | OG1  | 113190   | 114716  | -           | CDS       | Avi_0122         | sulfatase                                                              | OG18     | 115395  | 116840      | +         | CDS     | Avi_0126               | phosphomannomutase                              |        |             |           |         |
| 114          | CIN1                  | Rhizobiaceae     | OG1  | 2042548  | 2043660 | -           | CDS       | Avi_2480         | membrane protein                                                       | OG18     | 2044292 | 2044441     | +         | CDS     | Avi_2481               | hypothetical protein                            |        |             |           |         |
| 115          | CIN6                  | Brucellaceae     | OG14 | 915965   | 916684  | -           | CDS       | BAA13334_0101436 | regulatory protein LysR                                                | OG13     | 917303  | 918367      | -         | CDS     | BAA13334_0101437       | permease                                        |        |             |           |         |
| 116          | CIN5                  | Brucellaceae     | OG16 | 2058328  | 2059035 | -           | CDS       | BAA13334_0103398 | LrgB-like protein                                                      | OG4      | 2056541 | 2057788     | -         | CDS     | BAA13334_0103396       | hypothetical protein                            |        |             |           |         |

| # Cuckoo RNA | LEFT FLANKING FEATURE |                    |      |          |         |             |           |                | OVERLAPPING FEATURE                                    |          |         |             |           |               |                      | RIGHT FLANKING FEATURE          |         |             |           |                |                                        |                                                   |                                                          |
|--------------|-----------------------|--------------------|------|----------|---------|-------------|-----------|----------------|--------------------------------------------------------|----------|---------|-------------|-----------|---------------|----------------------|---------------------------------|---------|-------------|-----------|----------------|----------------------------------------|---------------------------------------------------|----------------------------------------------------------|
|              | CIN                   | Family             | OG   | Position | Strand  | Region type | Locus tag | Product        | OG                                                     | Position | Strand  | Region type | Locus tag | Product       | OG                   | Position                        | Strand  | Region type | Locus tag | Product        |                                        |                                                   |                                                          |
| 117          | CIN6                  | Brucellaceae       | OG14 | 764923   | 765642  | -           | CDS       | BAb519_I07190  | regulatory protein TetR                                |          |         |             |           |               | OG13                 | 766261                          | 767346  | -           | CDS       | BAb519_I07200  | hypothetical protein                   |                                                   |                                                          |
| 118          | CIN5                  | Brucellaceae       | OG16 | 357382   | 358089  | +           | CDS       | BAb519_I03260  | LrgB-like protein                                      |          |         |             |           |               | OG4                  | 358635                          | 359876  | +           | CDS       | BAb519_I03270  | esterase/lipase/thioesterase           |                                                   |                                                          |
| 119          | CIN5                  | Brucellaceae       | OG16 | 358997   | 359704  | +           | CDS       | BruAb1_0352    | hypothetical protein                                   |          |         |             |           |               | OG4                  | 360250                          | 361491  | +           | CDS       | BruAb1_0354    | lipoprotein                            |                                                   |                                                          |
| 120          | CIN5                  | Brucellaceae       | OG16 | 337093   | 337800  | +           | CDS       | BCAN_A0335     | LrgB family protein                                    | 337974   | 338309  | +           | CDS       | BCAN_A0336    | hypothetical protein | OG4                             | 338347  | 339588      | +         | CDS            | BCAN_A0337                             | hypothetical protein                              |                                                          |
| 121          | CIN5                  | Brucellaceae       | OG16 | 716593   | 717300  | -           | CDS       | BCA52141_I1159 | LrgB family protein                                    |          |         |             |           |               | OG4                  | 714805                          | 716052  | -           | CDS       | BCA52141_I1158 | hypothetical protein                   |                                                   |                                                          |
| 122          | CIN5                  | Brucellaceae       | OG16 | 358048   | 358755  | +           | CDS       | BMEA_A0364     | LrgB family protein                                    | 358929   | 359264  | +           | CDS       | BMEA_A0365    | hypothetical protein | OG4                             | 359302  | 360543      | +         | CDS            | BMEA_A0366                             | hypothetical protein                              |                                                          |
| 123          | CIN5                  | Brucellaceae       | OG16 | 358043   | 358750  | +           | CDS       | BM28_A0358     | LrgB family protein                                    |          |         |             |           |               | OG4                  | 359291                          | 360538  | +           | CDS       | BM28_A0359     | esterase/lipase/thioesterase           |                                                   |                                                          |
| 124          | CIN5                  | Brucellaceae       | OG16 | 358296   | 359003  | +           | CDS       | BM590_A0355    | LrgB family protein                                    |          |         |             |           |               | OG4                  | 359550                          | 360791  | +           | CDS       | BM590_A0356    | hypothetical protein                   |                                                   |                                                          |
| 125          | CIN5                  | Brucellaceae       | OG16 | 358238   | 358945  | +           | CDS       | BMNI_I0353     | hypothetical protein                                   |          |         |             |           |               | OG4                  | 359486                          | 360733  | +           | CDS       | BMNI_I0354     | lipoprotein                            |                                                   |                                                          |
| 126          | CIN5                  | Brucellaceae       | OG16 | 355365   | 356072  | +           | CDS       | BAB1_0356      | LrgB-like protein                                      |          |         |             |           |               | OG4                  | 356618                          | 357859  | +           | CDS       | BAB1_0358      | esterase/lipase/thioesterase           |                                                   |                                                          |
| 127          | CIN5                  | Brucellaceae       | OG16 | 1644494  | 1645201 | -           | CDS       | BMEI1596       | LrgB protein                                           | 1643985  | 1644371 | -           | CDS       | BMEI1595      | hypothetical protein | OG4                             | 1642706 | 1643914     | -         | CDS            | BMEI1594                               | hypothetical protein                              |                                                          |
| 128          | CIN5                  | Brucellaceae       | OG16 | 338771   | 339478  | +           | CDS       | BMI_I332       | LrgB family protein                                    | 339601   | 339987  | +           | CDS       | BMI_I333      | hypothetical protein | OG4                             | 340025  | 341266      | +         | CDS            | BMI_I334                               | lipoprotein, putative                             |                                                          |
| 129          | CIN5                  | Brucellaceae       | OG16 | 358754   | 359461  | +           | CDS       | BOV_0342       | hypothetical protein                                   |          |         |             |           |               |                      | 361342                          | 361653  | +           | CDS       | BOV_0344       | transposase OrfA                       |                                                   |                                                          |
| 130          | CIN5                  | Brucellaceae       | OG16 | 358865   | 359572  | +           | CDS       | BPI_I361       | LrgB family protein                                    | 359695   | 360081  | +           | CDS       | BPI_I362      | hypothetical protein | OG4                             | 360119  | 361360      | +         | CDS            | BPI_I363                               | lipoprotein                                       |                                                          |
| 131          | CIN6                  | Brucellaceae       | OG14 | 433486   | 434205  | +           | CDS       | BPI_I144       | TetR family transcriptional regulator                  | 432995   | 433183  | +           | CDS       | BPI_I1443     | hypothetical protein | OG13                            | 431809  | 432867      | +         | CDS            | BPI_I1442                              | hypothetical protein                              |                                                          |
| 132          | CIN6                  | Brucellaceae       | OG14 | 448672   | 449391  | +           | CDS       | BS1330_I10459  | TetR family transcriptional regulator                  | 448181   | 448369  | +           | CDS       | BS1330_I10458 | hypothetical protein | OG13                            | 446995  | 448053      | +         | CDS            | BS1330_I10457                          | hypothetical protein                              |                                                          |
| 133          | CIN5                  | Brucellaceae       | OG16 | 337090   | 337797  | +           | CDS       | BS1330_I0327   | hypothetical protein                                   | 337920   | 338306  | +           | CDS       | BS1330_I0328  | hypothetical protein | OG4                             | 338344  | 339585      | +         | CDS            | BS1330_I0329                           | putative lipoprotein                              |                                                          |
| 134          | CIN6                  | Brucellaceae       | OG14 | 449774   | 450493  | +           | CDS       | BSUIS_B0463    | hypothetical protein                                   | 449283   | 449471  | +           | CDS       | BSUIS_B0462   | hypothetical protein |                                 | 447158  | 447865      | -         | CDS            | BSUIS_B0460                            | hypothetical protein                              |                                                          |
| 135          | CIN5                  | Brucellaceae       | OG16 | 354629   | 355336  | +           | CDS       | BSUIS_A0355    | LrgB family protein                                    | 355510   | 355845  | +           | CDS       | BSUIS_A0356   | hypothetical protein |                                 | 357194  | 357562      | +         | CDS            | BSUIS_A0358                            | transposase for insertion sequence element IS6501 |                                                          |
| 136          | CIN6                  | Brucellaceae       | OG14 | 448644   | 449363  | +           | CDS       | BSVBI22_B0458  | TetR family transcriptional regulator                  | 448153   | 448341  | +           | CDS       | BSVBI22_B0457 | hypothetical protein | OG13                            | 446967  | 448025      | +         | CDS            | BSVBI22_B0456                          | hypothetical protein                              |                                                          |
| 137          | CIN5                  | Brucellaceae       | OG16 | 337051   | 337758  | +           | CDS       | BSVBI22_A0327  | hypothetical protein                                   | 337881   | 338267  | +           | CDS       | BSVBI22_A0328 | hypothetical protein | OG4                             | 338305  | 339546      | +         | CDS            | BSVBI22_A0329                          | putative lipoprotein                              |                                                          |
| 138          |                       | Phyllobacteriaceae |      | 33959    | 34477   | +           | CDS       | Meso_4137      | hypothetical protein                                   | 32011    | 32697   | +           | CDS       | Meso_4135     | hypothetical protein |                                 | 31210   | 31944       | +         | CDS            | Meso_4134                              | hypothetical protein                              |                                                          |
| 139          |                       | Phyllobacteriaceae |      | 135539   | 136099  | -           | CDS       | Meso_4236      | hypothetical protein                                   |          |         |             |           |               |                      | 134555                          | 135097  | -           | CDS       | Meso_4235      | hypothetical protein                   |                                                   |                                                          |
| 140          | CIN1                  | Phyllobacteriaceae | OG1  | 1916546  | 1916686 | +           | CDS       | Meso_1791      | hypothetical protein                                   |          |         |             |           |               | OG7                  | 1916819                         | 1918300 | +           | CDS       | Meso_1792      | tRNA (uracil-5)-methyltransferase Gid  |                                                   |                                                          |
| 141          |                       | Phyllobacteriaceae |      | 3977363  | 3978682 | +           | CDS       | Meso_3688      | NAD-binding homoserine dehydrogenase                   |          |         |             |           |               |                      | 3975340                         | 3976962 | -           | CDS       | Meso_3687      | alpha amylase                          |                                                   |                                                          |
| 142          | CIN1                  | Rhodobacteraceae   |      | 1584816  | 1584983 | +           | CDS       | KVU_1472       | hypothetical protein                                   |          |         |             |           |               | OG18                 | 1585271                         | 1586425 | +           | CDS       | KVU_1473       | benzoate transporter                   |                                                   |                                                          |
| 143          | CIN1                  | Rhodobacteraceae   |      | 363726   | 363893  | -           | CDS       | EIO_0391       | hypothetical protein                                   |          |         |             |           |               | OG18                 | 362284                          | 363438  | -           | CDS       | EIO_0390       | benzoate transporter                   |                                                   |                                                          |
| 144          |                       | Rhodobacteraceae   |      |          |         |             |           |                |                                                        |          |         |             |           |               |                      |                                 |         |             |           |                |                                        |                                                   |                                                          |
| 145          | CIN1                  | Rhodobacteraceae   | OG1  | 20582    | 20797   | +           | CDS       | SKA53_07326    | hypothetical protein                                   |          |         |             |           |               | OG2                  | 21202                           | 21663   | -           | CDS       | SKA53_07331    | transcriptional regulator, AsnC family |                                                   |                                                          |
| 146          |                       | Phyllobacteriaceae |      | 2513677  | 2514135 | +           | CDS       | Mesau_02453    | phasin                                                 |          |         |             |           |               |                      | 2514487                         | 2514563 | +           | tRNA      | Mesau_02454    | tRNA-His                               |                                                   |                                                          |
| 147          | CIN1                  | Phyllobacteriaceae | OG1  | 3843005  | 3843145 | -           | CDS       | Mesau_03779    | uncharacterized conserved small protein                | OG7      | 3841019 | 3842611     | -         | CDS           | Mesau_03778          | tRNA:m(5)U-54 methyltransferase |         | 3840645     | 3840947   | -              | CDS                                    | Mesau_03777                                       | putative addition module antidote protein, CC2985 family |
| 148          | CIN1                  | Phyllobacteriaceae | OG1  | 3843005  | 3843145 | -           | CDS       | Mesau_03779    | uncharacterized conserved small protein                |          |         |             |           |               | OG7                  | 3841019                         | 3842611 | -           | CDS       | Mesau_03778    | tRNA:m(5)U-54 methyltransferase        |                                                   |                                                          |
| 149          | CIN1                  | Phyllobacteriaceae | OG1  | 3843005  | 3843145 | -           | CDS       | Mesau_03779    | uncharacterized conserved small protein                |          |         |             |           |               | OG7                  | 3841019                         | 3842611 | -           | CDS       | Mesau_03778    | tRNA:m(5)U-54 methyltransferase        |                                                   |                                                          |
| 150          |                       | Phyllobacteriaceae |      | 5249354  | 5250376 | +           | CDS       | Mesau_05196    | ABC-type sugar transport system, periplasmic component |          |         |             |           |               |                      | 5250687                         | 5251277 | -           | CDS       | Mesau_05197    | transcriptional regulator              |                                                   |                                                          |
| 151          |                       | Phyllobacteriaceae |      | 241784   | 242047  | -           | CDS       | Mesci_6303     | hypothetical protein                                   |          |         |             |           |               |                      | 241107                          | 241262  | -           | CDS       | Mesci_6302     | hypothetical protein                   |                                                   |                                                          |
| 152          |                       | Phyllobacteriaceae |      | 2545134  | 2545592 | +           | CDS       | Mesci_2426     | phasin                                                 |          |         |             |           |               |                      | 2545962                         | 2546038 | +           | tRNA      | Mesci_R0032    | tRNA-His                               |                                                   |                                                          |
| 153          | CIN1                  | Phyllobacteriaceae | OG1  | 3675321  | 3675461 | -           | CDS       | Mesci_3514     | hypothetical protein                                   |          |         |             |           |               | OG7                  | 3673344                         | 3674753 | -           | CDS       | Mesci_3513     | hypothetical protein                   |                                                   |                                                          |
| 154          | CIN1                  | Phyllobacteriaceae | OG1  | 3675321  | 3675461 | -           | CDS       | Mesci_3514     | hypothetical protein                                   |          |         |             |           |               | OG7                  | 3673344                         | 3674753 | -           | CDS       | Mesci_3513     | hypothetical protein                   |                                                   |                                                          |
| 155          | CIN1                  | Phyllobacteriaceae | OG1  | 3675321  | 3675461 | -           | CDS       | Mesci_3514     | hypothetical protein                                   |          |         |             |           |               | OG7                  | 3673344                         | 3674753 | -           | CDS       | Mesci_3513     | hypothetical protein                   |                                                   |                                                          |
| 156          |                       | Phyllobacteriaceae |      | 5264750  | 5265772 | +           | CDS       | Mesci_5119     | LacI family transcriptional regulator                  | 5265709  | 5265903 | -           | CDS       | Mesci_5120    | hypothetical protein |                                 | 5266103 | 5266693     | -         | CDS            | Mesci_5121                             | TetR family transcriptional regulator             |                                                          |
| 157          | CIN1                  | Phyllobacteriaceae |      | 890180   | 890389  | +           | CDS       | msr1062        | hypothetical protein                                   |          |         |             |           |               | OG7                  | 891150                          | 892568  | +           | CDS       | mlr1064        | tRNA (uracil-5)-methyltransferase Gid  |                                                   |                                                          |
| 158          | CIN1                  | Phyllobacteriaceae |      | 890180   | 890389  | +           | CDS       | msr1062        | hypothetical protein                                   |          |         |             |           |               | OG7                  | 891150                          | 892568  | +           | CDS       | mlr1064        | tRNA (uracil-5)-methyltransferase Gid  |                                                   |                                                          |
| 159          | CIN1                  | Phyllobacteriaceae |      | 890180   | 890389  | +           | CDS       | msr1062        | hypothetical protein                                   |          |         |             |           |               | OG7                  | 891150                          | 892568  | +           | CDS       | mlr1064        | tRNA (uracil-5)-methyltransferase Gid  |                                                   |                                                          |

| # Cuckoo RNA | LEFT FLANKING FEATURE |                    |      |          |         |             |           |                   | OVERLAPPING FEATURE                        |          |        |             |           |                   |                      |            | RIGHT FLANKING FEATURE |             |                   |                                                     |                                                                  |  |  |  |
|--------------|-----------------------|--------------------|------|----------|---------|-------------|-----------|-------------------|--------------------------------------------|----------|--------|-------------|-----------|-------------------|----------------------|------------|------------------------|-------------|-------------------|-----------------------------------------------------|------------------------------------------------------------------|--|--|--|
|              | CIN                   | Family             | OG   | Position | Strand  | Region type | Locus tag | Product           | OG                                         | Position | Strand | Region type | Locus tag | Product           | OG                   | Position   | Strand                 | Region type | Locus tag         | Product                                             |                                                                  |  |  |  |
| 160          |                       | Phyllobacteriaceae |      | 4952439  | 4952903 | -           | CDS       | mll6119           | transcriptional regulatory protein         |          |        |             |           |                   | 4951975              | 4952181    | +                      | CDS         | mll6118           | cold-shock protein                                  |                                                                  |  |  |  |
| 161          |                       | Phyllobacteriaceae |      | 5350228  | 5350686 | +           | CDS       | mlr6541           | hypothetical protein                       |          |        |             |           |                   | 5351042              | 5351115    | +                      | tRNA        | MAFF741           | tRNA-His                                            |                                                                  |  |  |  |
| 162          |                       | Phyllobacteriaceae |      | 6092659  | 6093681 | -           | CDS       | mll7360           | hypothetical protein                       |          |        |             |           |                   | 6091731              | 6092324    | +                      | CDS         | mir7359           | transcriptional regulator                           |                                                                  |  |  |  |
| 163          |                       | Phyllobacteriaceae |      | 2663198  | 2663656 | +           | CDS       | Mesop_2561        | phasin                                     |          |        |             |           |                   | 2664008              | 2664084    | +                      | tRNA        | Mesop_R0033       | tRNA-His                                            |                                                                  |  |  |  |
| 164          | CIN1                  | Phyllobacteriaceae | OG1  | 4112624  | 4112764 | -           | CDS       | Mesop_4003        | hypothetical protein                       |          |        |             |           |                   | OG7_4110639          | 4112048    | -                      | CDS         | Mesop_4002        | gid protein                                         |                                                                  |  |  |  |
| 165          | CIN1                  | Phyllobacteriaceae | OG1  | 4112624  | 4112764 | -           | CDS       | Mesop_4003        | hypothetical protein                       |          |        |             |           |                   | OG7_4110639          | 4112048    | -                      | CDS         | Mesop_4002        | gid protein                                         |                                                                  |  |  |  |
| 166          | CIN1                  | Phyllobacteriaceae | OG1  | 4112624  | 4112764 | -           | CDS       | Mesop_4003        | hypothetical protein                       |          |        |             |           |                   | OG7_4110639          | 4112048    | -                      | CDS         | Mesop_4002        | gid protein                                         |                                                                  |  |  |  |
| 167          |                       | Phyllobacteriaceae |      | 5829273  | 5830295 | +           | CDS       | Mesop_5703        | LacI family transcriptional regulator      |          |        |             |           |                   | 5830639              | 5831229    | -                      | CDS         | Mesop_5704        | TetR family transcriptional regulator               |                                                                  |  |  |  |
| 168          | CIN1                  | Rhodobacteraceae   | OG1  | 158763   | 158990  | +           | CDS       | OG2516_05838      | hypothetical protein                       |          |        |             |           |                   | 159616               | 160842     | -                      | CDS         | OG2516_05843      | heat shock protein, Hsp70 family protein            |                                                                  |  |  |  |
| 169          | CIN5                  | Brucellaceae       | OG16 | 447656   | 448351  | +           | CDS       | Oant_0422         | LrgB family protein                        |          |        |             |           |                   | 448748               | 450301     | +                      | CDS         | Oant_0423         | glyoxalase/bleomycin resistance protein/dioxygenase |                                                                  |  |  |  |
| 170          |                       | Brucellaceae       |      | 275652   | 276380  | +           | CDS       | Oant_2970         | septum formation inhibitor                 |          |        |             |           |                   | 272174               | 273850     | -                      | CDS         | Oant_2969         | hypothetical protein                                |                                                                  |  |  |  |
| 171          |                       | Brucellaceae       |      | 272174   | 273850  | -           | CDS       | Oant_2969         | hypothetical protein                       |          |        |             |           |                   | 275652               | 276380     | +                      | CDS         | Oant_2970         | septum formation inhibitor                          |                                                                  |  |  |  |
| 172          | CIN1                  | Brucellaceae       | OG1  | 1275426  | 1275572 | +           | CDS       | Oant_3865         | hypothetical protein                       |          |        |             |           |                   | 1275787              | 1277010    | -                      | CDS         | Oant_3866         | major facilitator superfamily transporter           |                                                                  |  |  |  |
| 173          | CIN1                  | Rhodobacteraceae   |      | 805909   | 806127  | -           | CDS       | OA238_c07730      | hypothetical protein                       |          |        |             |           |                   | OG2_805130           | 805633     | +                      | CDS         | OA238_c07720      | putative AsnC family transcriptional regulator      |                                                                  |  |  |  |
| 174          |                       | Hyphomicrobiaceae  |      | 2111274  | 2112173 | +           | CDS       | KKY_2127          | LysR family transcriptional regulator      |          |        |             |           |                   | 2113135              | 2114337    | -                      | CDS         | KKY_2128          | aspartate aminotransferase                          |                                                                  |  |  |  |
| 175          |                       | Hyphomicrobiaceae  |      | 2111274  | 2112173 | +           | CDS       | KKY_2127          | LysR family transcriptional regulator      |          |        |             |           |                   | 2113135              | 2114337    | -                      | CDS         | KKY_2128          | aspartate aminotransferase                          |                                                                  |  |  |  |
| 176          |                       |                    |      | 2331701  | 2331850 | -           | CDS       | SL003B_2210       | hypothetical protein                       |          |        |             |           |                   | 2330776              | 2331393    | +                      | CDS         | SL003B_2209       | hypothetical protein                                |                                                                  |  |  |  |
| 177          | CIN5                  | Rhizobiaceae       | OG3  | 461301   | 462182  | +           | CDS       | RHE_CH00449       | oxidoreductase                             |          |        |             |           |                   | OG4_462794           | 464071     | +                      | CDS         | RHE_CH00450       | hypothetical protein                                |                                                                  |  |  |  |
| 178          |                       | Rhizobiaceae       |      | 1926684  | 192778  | +           | CDS       | RHE_CH01839       | hypothetical protein                       |          |        |             |           |                   | 1925699              | 1926187    | +                      | CDS         | RHE_CH01838       | hypothetical protein                                |                                                                  |  |  |  |
| 179          | CIN2                  | Rhizobiaceae       | OG6  | 4314798  | 4315589 | +           | CDS       | RHE_CH04071       | transporter, substrate-binding protein     |          |        |             |           |                   | OG5_4313781          | 4314359    | +                      | CDS         | RHE_CH04070       | nicotinic acid mononucleotide adenyltransferase     |                                                                  |  |  |  |
| 180          |                       | Rhizobiaceae       |      | 22159    | 22494   | -           | CDS       | RHE_Pf00022       | hypothetical protein                       |          |        |             |           |                   | 23286                | 23726      | +                      | CDS         | RHE_Pf00023       | hypothetical protein                                |                                                                  |  |  |  |
| 181          | CIN5                  | Rhizobiaceae       | OG3  | 512732   | 513613  | +           | CDS       | RHECIAT_CH0000515 | oxidoreductase                             | 513699   | 514148 | +           | CDS       | RHECIAT_CH0000516 | hypothetical protein | OG4_514221 | 515498                 | +           | CDS               | RHECIAT_CH0000517                                   | hypothetical protein                                             |  |  |  |
| 182          |                       | Rhizobiaceae       |      | 1912923  | 1914026 | +           | CDS       | RHECIAT_CH0001926 | hypothetical protein                       |          |        |             |           |                   | 1911937              | 1912446    | +                      | CDS         | RHECIAT_CH0001925 | hypothetical protein                                |                                                                  |  |  |  |
| 183          | CIN2                  | Rhizobiaceae       |      | 4445118  | 4445327 | -           | CDS       | RHECIAT_CH0004360 | hypothetical protein                       |          |        |             |           |                   | OG5_4444289          | 4444867    | +                      | CDS         | RHECIAT_CH0004359 | nicotinic acid mononucleotide adenyltransferase     |                                                                  |  |  |  |
| 184          | CIN5                  | Rhizobiaceae       | OG3  | 459092   | 459973  | +           | CDS       | REMIM1_CH00460    | aldo/keto reductase protein                |          |        |             |           |                   | OG4_460586           | 461863     | +                      | CDS         | REMIM1_CH00462    | alpha/beta hydrolase family protein                 |                                                                  |  |  |  |
| 185          |                       | Rhizobiaceae       |      | 1884795  | 1885889 | +           | CDS       | REMIM1_CH01890    | hypothetical protein                       |          |        |             |           |                   | 1883810              | 1884298    | +                      | CDS         | REMIM1_CH01888    | hypothetical protein                                |                                                                  |  |  |  |
| 186          | CIN2                  | Rhizobiaceae       | OG6  | 4217687  | 4218478 | +           | CDS       | REMIM1_CH04188    | transporter substrate-binding protein ModA |          |        |             |           |                   | OG5_4216673          | 4217251    | +                      | CDS         | REMIM1_CH04187    | nicotinate-nucleotide adenyltransferase             |                                                                  |  |  |  |
| 187          |                       | Rhizobiaceae       |      | 19546    | 20625   | -           | CDS       | REMIM1_Pf00021    | virulence factor BrkB family protein       | 23158    | 23391  | -           | CDS       | REMIM1_Pf00023    | hypothetical protein | 23630      | 24070                  | +           | CDS               | REMIM1_Pf00024                                      | GFA family glutathione-dependent formaldehyde-activating protein |  |  |  |
| 188          |                       | Rhizobiaceae       |      | 111695   | 112336  | +           | CDS       | Rleg_4742         | hypothetical protein                       | 112352   | 112612 | +           | CDS       | Rleg_4743         | hypothetical protein | 113441     | 114331                 | -           | CDS               | Rleg_4745                                           | protein-L-isoaspartate(D-aspartate) O-methyltransferase          |  |  |  |
| 189          | CIN5                  | Rhizobiaceae       | OG3  | 105825   | 106706  | +           | CDS       | Rleg_0114         | aldo/keto reductase                        |          |        |             |           |                   | OG4_107377           | 108654     | +                      | CDS         | Rleg_0115         | hypothetical protein                                |                                                                  |  |  |  |
| 190          | CIN1                  | Rhizobiaceae       |      | 1697482  | 1698585 | +           | CDS       | Rleg_1701         | hypothetical protein                       |          |        |             |           |                   | OG1_1696657          | 1696803    | -                      | CDS         | Rleg_1700         | hypothetical protein                                |                                                                  |  |  |  |
| 191          | CIN2                  | Rhizobiaceae       | OG6  | 4297098  | 4297889 | +           | CDS       | Rleg_4202         | transporter periplasmic molybdenum ABC     |          |        |             |           |                   | OG5_4295976          | 4296575    | +                      | CDS         | Rleg_4201         | nicotinic acid mononucleotide adenyltransferase     |                                                                  |  |  |  |
| 192          |                       | Rhizobiaceae       |      | 306976   | 307923  | -           | CDS       | Rleg2_4670        | transposase IS110 family protein           | 306298   | 306825 | +           | CDS       | Rleg2_4669        | hypothetical protein | 305380     | 306273                 | +           | CDS               | Rleg2_4668                                          | protein-L-isoaspartate(D-aspartate) O-methyltransferase          |  |  |  |
| 193          | CIN5                  | Rhizobiaceae       | OG3  | 96796    | 97677   | +           | CDS       | Rleg2_0104        | aldo/keto reductase                        |          |        |             |           |                   | OG4_98282            | 99559      | +                      | CDS         | Rleg2_0105        | hypothetical protein                                |                                                                  |  |  |  |
| 194          | CIN1                  | Rhizobiaceae       |      | 1534947  | 1536050 | +           | CDS       | Rleg2_1503        | hypothetical protein                       |          |        |             |           |                   | OG1_1533929          | 1534075    | -                      | CDS         | Rleg2_1502        | hypothetical protein                                |                                                                  |  |  |  |

| # Cuckoo RNA | LEFT FLANKING FEATURE |                  |      |          |         |             |               |                  |                                                                  | OVERLAPPING FEATURE |         |             |               |               |                         | RIGHT FLANKING FEATURE                          |        |             |           |                                            |
|--------------|-----------------------|------------------|------|----------|---------|-------------|---------------|------------------|------------------------------------------------------------------|---------------------|---------|-------------|---------------|---------------|-------------------------|-------------------------------------------------|--------|-------------|-----------|--------------------------------------------|
|              | CIN                   | Family           | OG   | Position | Strand  | Region type | Locus tag     | Product          | OG                                                               | Position            | Strand  | Region type | Locus tag     | Product       | OG                      | Position                                        | Strand | Region type | Locus tag | Product                                    |
| 195          | CIN2                  | Rhizobiaceae     | OG6  | 4019781  | 4020572 | +           | CDS           | Rleg2_3878       | molybdenum ABC transporter periplasmic molybdate-binding protein | OG5                 | 4018721 | 4019299     | +             | CDS           | Rleg2_3877              | nicotinic acid mononucleotide adenyltransferase |        |             |           |                                            |
| 196          |                       | Rhizobiaceae     |      | 407072   | 407087  | -           | repeat_region |                  |                                                                  | 405332              | 407214  | +           | repeat_region | 405592        | -                       |                                                 |        |             |           | protein-L-isoaspartate O-methyltransferase |
| 197          | CIN5                  | Rhizobiaceae     | OG3  | 511376   | 512272  | +           | CDS           | RL0474           | aldo-keto reductase                                              |                     | 512816  | 513202      | -             | CDS           | RL0475                  | hypothetical protein                            |        |             |           |                                            |
| 198          | CIN1                  | Rhizobiaceae     | OG7  | 2175400  | 2176503 | +           | CDS           | RL2060           | transmembrane protein                                            | OG7                 | 2172416 | 2173849     | -             | CDS           | RL2059                  | tRNA (uracil-5-)-methyltransferase              |        |             |           | Gid                                        |
| 199          | CIN2                  | Rhizobiaceae     | OG6  | 4988507  | 4989298 | +           | CDS           | RL4685           | solute-binding component of ABC transporter                      | OG5                 | 4987413 | 4988012     | +             | CDS           | RL4684                  | nicotinic acid mononucleotide adenyltransferase |        |             |           |                                            |
| 200          | CIN5                  | Rhizobiaceae     | OG3  | 541169   | 542050  | +           | CDS           | RTCIA899_CH02665 | putative oxidoreductase                                          | OG4                 | 542600  | 543904      | +             | CDS           | RTCIA899_CH02670        | putative esterase/lipase/thioesterase           |        |             |           |                                            |
| 201          |                       | Rhizobiaceae     |      | 1632031  | 1633170 | +           | CDS           | RTCIA899_CH08010 | hypothetical protein                                             |                     | 1631634 | 1631747     | +             | CDS           | RTCIA899_CH08005        | hypothetical protein                            |        |             |           |                                            |
| 202          | CIN2                  | Rhizobiaceae     | OG6  | 3775772  | 3776569 | +           | CDS           | RTCIA899_CH18465 | molybdate ABC transporter, substrate-binding protein             | OG5                 | 3774593 | 3775210     | +             | CDS           | RTCIA899_CH18455        | nicotinate nucleotide adenyltransferase         |        |             |           |                                            |
| 203          | CIN1                  | Rhodobacteraceae | OG1  | 289036   | 289251  | -           | CDS           | SSE37_24084      | hypothetical protein                                             |                     | 285278  | 288367      | -             | CDS           | SSE37_24079             | valyl-tRNA synthetase                           |        |             |           |                                            |
| 204          | CIN1                  | Rhizobiaceae     |      | 1359706  | 1359849 | +           | CDS           | SFHH103_01270    | hypothetical protein                                             | OG1                 | 1358962 | 1359105     | -             | CDS           | SFHH103_01269           | hypothetical protein                            |        |             |           |                                            |
| 205          | CIN1                  | Rhizobiaceae     |      | 1360111  | 1361322 | -           | CDS           | SFHH103_01271    | hypothetical protein                                             | OG1                 | 1358962 | 1359105     | -             | CDS           | SFHH103_01269           | hypothetical protein                            |        |             |           |                                            |
| 206          | CIN3                  | Rhizobiaceae     |      | 4014002  | 4014457 | +           | CDS           | SFHH103_03688    | putative endonuclease V                                          | OG12                | 4014756 | 4015643     | +             | CDS           | SFHH103_03689           | hypothetical protein                            |        |             |           |                                            |
| 207          | CIN4                  | Rhizobiaceae     | OG10 | 233767   | 234051  | +           | CDS           | SFHH103_05074    | acylphosphatase                                                  | OG11                | 232648  | 233319      | -             | CDS           | SFHH103_05073           | RNA polymerase sigma factor sigW                |        |             |           | Sigma-W factor                             |
| 208          |                       | Rhizobiaceae     |      | 157772   | 157978  | +           | CDS           | SFHH103_04704    | hypothetical protein                                             |                     | 158617  | 158883      | -             | CDS           | SFHH103_04705           | hypothetical protein                            |        |             |           |                                            |
| 209          |                       | Rhizobiaceae     |      | 157772   | 157978  | +           | CDS           | SFHH103_04704    | hypothetical protein                                             |                     | 158617  | 158883      | -             | CDS           | SFHH103_04705           | hypothetical protein                            |        |             |           |                                            |
| 210          | CIN4                  | Rhizobiaceae     | OG10 | 2204845  | 2205168 | -           | CDS           | NGR_b21490       | acylphosphatase                                                  | OG11                | 2205588 | 2206316     | +             | CDS           | NGR_b21500              | RNA polymerase sigma factor                     |        |             |           |                                            |
| 211          | CIN1                  | Rhizobiaceae     | OG8  | 1434843  | 1434925 | -           | tRNA          | NGR_c13910       | tRNA-Leu                                                         | OG1                 | 1433785 | 1433985     | -             | CDS           | NGR_c13890              | hypothetical protein                            |        |             |           |                                            |
| 212          | CIN1                  | Rhizobiaceae     | OG8  | 1434843  | 1434925 | -           | tRNA          | NGR_c13910       | tRNA-Leu                                                         | OG1                 | 1433785 | 1433985     | -             | CDS           | NGR_c13890              | hypothetical protein                            |        |             |           |                                            |
| 213          | CIN3                  | Rhizobiaceae     | OG9  | 3718015  | 3720336 | -           | CDS           | NGR_c35080       | penicillin-binding protein                                       |                     | 3720525 | 3721688     | +             | CDS           | NGR_c35090              | transmembrane protein                           |        |             |           |                                            |
| 214          | CIN4                  | Rhizobiaceae     | OG10 | 1712776  | 1713234 | -           | CDS           | USDA257_c16100   | acylphosphatase AcyP                                             | OG11                | 1713523 | 1714206     | +             | CDS           | USDA257_c16110          | polymerase sigma-24 subunit                     |        |             |           |                                            |
| 215          | CIN1                  | Rhizobiaceae     | OG8  | 3753302  | 3753384 | -           | tRNA          | USDA257_c35860   | tRNA-Leu                                                         | OG1                 | 3752255 | 3752398     | -             | CDS           | USDA257_c35850          | hypothetical protein                            |        |             |           |                                            |
| 216          | CIN1                  | Rhizobiaceae     | OG8  | 3753302  | 3753384 | -           | tRNA          | USDA257_c35860   | tRNA-Leu                                                         | OG1                 | 3752255 | 3752398     | -             | CDS           | USDA257_c35850          | hypothetical protein                            |        |             |           |                                            |
| 217          |                       | Rhizobiaceae     |      | 5733195  | 5733668 | +           | CDS           | USDA257_c55250   | 3-demethylubiquinone-9 3-methyltransferase                       |                     | 5733999 | 5734190     | +             | CDS           | USDA257_c55260          | hypothetical protein                            |        |             |           |                                            |
| 218          | CIN3                  | Rhizobiaceae     | OG9  | 6264591  | 6266813 | -           | CDS           | USDA257_c60090   | penicillin-binding protein 2D                                    |                     | 6267110 | 6268270     | +             | CDS           | USDA257_c60100          | S-adenosylmethionine uptake transporter Sam     |        |             |           |                                            |
| 219          |                       | Rhizobiaceae     |      | 158177   | 159061  | +           | CDS           | USDA257_p01790   | hypothetical protein                                             |                     | 159299  | 159709      | -             | CDS           | USDA257_p01800          | hypothetical protein                            |        |             |           |                                            |
| 220          | CIN4                  | Rhizobiaceae     | OG10 | 679315   | 679599  | +           | CDS           | Smed_4198        | acylphosphatase                                                  | OG11                | 678214  | 678885      | -             | CDS           | Smed_4197               | RNA polymerase sigma factor                     |        |             |           |                                            |
| 221          | CIN1                  | Rhizobiaceae     | OG8  | 1258759  | 1258843 | +           | tRNA          | Smed_R0020       | tRNA-Leu                                                         | OG1                 | 1257614 | 1257814     | -             | CDS           | Smed_1180               | hypothetical protein                            |        |             |           |                                            |
| 222          | CIN1                  | Rhizobiaceae     | OG8  | 1258759  | 1258843 | +           | tRNA          | Smed_R0020       | tRNA-Leu                                                         | OG1                 | 1257614 | 1257814     | -             | CDS           | Smed_1180               | hypothetical protein                            |        |             |           |                                            |
| 223          | CIN3                  | Rhizobiaceae     |      | 3590494  | 3590925 | -           | CDS           | Smed_3387        | pyrimidine dimer DNA glycosylase                                 | OG12                | 3589318 | 3590205     | -             | CDS           | Smed_3386               | hypothetical protein                            |        |             |           |                                            |
| 224          |                       | Rhizobiaceae     |      | 1219615  | 1220355 | +           | CDS           | SMa2165          | short chain                                                      |                     | 1221480 | 1221947     | +             | CDS           | SMa2167                 | Hypothetical/Global homology                    |        |             |           |                                            |
| 225          | CIN3                  | Rhizobiaceae     |      | 207244   | 209547  | +           | CDS           | SMc02856         | cell envelope                                                    | OG12                | 205860  | 206783      | -             | CDS           | SMc02855                | hypothetical/global homology                    |        |             |           |                                            |
| 226          | CIN1                  | Rhizobiaceae     | OG8  | 1668357  | 1668441 | +           | tRNA          | SMc02125         | tRNA-Leu                                                         |                     | 1667262 | 1667434     | -             | repeat_region | REPEAT SM-4             | Sm-4 OR SMc04537                                |        |             |           |                                            |
| 227          | CIN1                  | Rhizobiaceae     | OG8  | 1668357  | 1668441 | +           | tRNA          | SMc02125         | tRNA-Leu                                                         |                     | 1667262 | 1667434     | -             | repeat_region | REPEAT SM-4             | Sm-4 OR SMc04537                                |        |             |           |                                            |
| 228          | CIN4                  | Rhizobiaceae     | OG10 | 1605382  | 1605705 | -           | CDS           | SM_b20590        | Hypothetical/Partial homology                                    |                     | 1605767 | 1606063     | -             | CDS           | SM_b20591               | Unknown                                         |        |             |           |                                            |
| 229          |                       | Rhizobiaceae     |      | 1217953  | 1218693 | +           | CDS           | SM2011_a2165     | short chain alcohol dehydrogenase-related dehydrogenase          |                     | 1219818 | 1220285     | +             | CDS           | SM2011_a2167            | hypothetical protein                            |        |             |           |                                            |
| 230          | CIN3                  | Rhizobiaceae     | OG9  | 207245   | 209548  | +           | CDS           | SM2011_c02856    | Putative penicillin-binding protein                              | OG12                | 205861  | 206784      | -             | CDS           | SM2011_c02855           | putative transmembrane protein                  |        |             |           |                                            |
| 231          | CIN1                  | Rhizobiaceae     | OG8  | 1668066  | 1668150 | +           | tRNA          | SM2011_c02125    | tRNA-Leu                                                         |                     | 1666971 | 1667143     | -             | repeat_region | corresponds to SMc04537 | Sm-4                                            |        |             |           |                                            |

| #<br>Cuckoo<br>RNA | LEFT FLANKING FEATURE |              |      |          |         |             |           |                 |                                            | OVERLAPPING FEATURE |         |             |           |               |                      | RIGHT FLANKING FEATURE |         |               |                         |                 |                                                                |                                                    |                      |
|--------------------|-----------------------|--------------|------|----------|---------|-------------|-----------|-----------------|--------------------------------------------|---------------------|---------|-------------|-----------|---------------|----------------------|------------------------|---------|---------------|-------------------------|-----------------|----------------------------------------------------------------|----------------------------------------------------|----------------------|
|                    | CIN                   | Family       | OG   | Position | Strand  | Region type | Locus tag | Product         | OG                                         | Position            | Strand  | Region type | Locus tag | Product       | OG                   | Position               | Strand  | Region type   | Locus tag               | Product         |                                                                |                                                    |                      |
| 232                | CIN1                  | Rhizobiaceae | OG8  | 1668066  | 1668150 | +           | tRNA      | SM2011_c02125   | tRNA-Leu                                   |                     |         |             |           |               | 1666971              | 1667143                | -       | repeat_region | corresponds to SMc04537 | Sm-4            |                                                                |                                                    |                      |
| 233                | CIN4                  | Rhizobiaceae | OG10 | 1605397  | 1605720 | -           | CDS       | SM2011_b20590   | Putative acylphosphatase                   | 1605782             | 1606105 | -           | CDS       | SM2011_b20591 | Hypothetical protein | OG11                   | 1606104 | 1606787       | +                       | CDS             | SM2011_b20592                                                  | RNA polymerase sigma factor, ECF subfamily protein |                      |
| 234                | CIN1                  | Rhizobiaceae | OG8  | 1370668  | 1370752 | +           | tRNA      | Sinme_R0020     | tRNA-Leu                                   | 1369434             | 1369994 | -           | CDS       | Sinme_1348    | hypothetical protein | OG1                    | 1369047 | 1369190       | -                       | CDS             | Sinme_1347                                                     | hypothetical protein                               |                      |
| 235                | CIN1                  | Rhizobiaceae | OG8  | 1370668  | 1370752 | +           | tRNA      | Sinme_R0020     | tRNA-Leu                                   |                     |         |             |           |               |                      |                        |         |               |                         | CDS             | Sinme_1348                                                     | hypothetical protein                               |                      |
| 236                | CIN3                  | Rhizobiaceae | OG9  | 3627309  | 3629612 | +           | CDS       | Sinme_3508      | penicillin-binding protein 1A family       |                     |         |             |           |               | OG12                 | 3625925                | 3626848 | -             | CDS                     | Sinme_3507      | hypothetical protein                                           |                                                    |                      |
| 237                | CIN4                  | Rhizobiaceae | OG10 | 574319   | 574603  | +           | CDS       | Sinme_4239      | acylphosphatase                            |                     |         |             |           |               | OG11                 | 573216                 | 573899  | -             | CDS                     | Sinme_4238      | ECF subfamily RNA polymerase sigma-24 subunit                  |                                                    |                      |
| 238                |                       | Rhizobiaceae |      | 171097   | 171837  | +           | CDS       | Sinme_6793      | 3-oxoacyl-(acyl-carrier-protein) reductase |                     |         |             |           |               |                      | 172524                 | 172853  | -             | CDS                     | Sinme_6794      | hypothetical protein                                           |                                                    |                      |
| 239                | CIN1                  | Rhizobiaceae | OG8  | 1232766  | 1232850 | +           | tRNA      | SinmeB_R0020    | tRNA-Leu                                   | OG1                 | 1231144 | 1231287     | -         | CDS           | SinmeB_1177          | hypothetical protein   | OG1     | 1231144       | 1231287                 | -               | CDS                                                            | SinmeB_1177                                        | hypothetical protein |
| 240                | CIN1                  | Rhizobiaceae | OG8  | 1232766  | 1232850 | +           | tRNA      | SinmeB_R0020    | tRNA-Leu                                   |                     |         |             |           |               | OG12                 | 3478596                | 3479519 | -             | CDS                     | SinmeB_3284     | hypothetical protein                                           |                                                    |                      |
| 241                | CIN3                  | Rhizobiaceae | OG9  | 3479980  | 3482283 | +           | CDS       | SinmeB_3285     | penicillin-binding protein                 |                     |         |             |           |               | OG11                 | 1375593                | 1376276 | -             | CDS                     | SinmeB_4732     | ECF subfamily RNA polymerase sigma-24 subunit                  |                                                    |                      |
| 242                | CIN4                  | Rhizobiaceae | OG10 | 1376696  | 1376980 | +           | CDS       | SinmeB_4733     | acylphosphatase                            |                     |         |             |           |               | OG12                 | 200597                 | 201520  | -             | CDS                     | C770_GR4Chr0183 | Permeases of the drug/metabolite transporter (DMT) superfamily |                                                    |                      |
| 243                | CIN3                  | Rhizobiaceae | OG9  | 201981   | 204284  | +           | CDS       | C770_GR4Chr0184 | penicillin-binding protein, 1A family      |                     |         |             |           |               | OG1                  | 1636263                | 1636406 | -             | CDS                     | C770_GR4Chr1564 | putative conserved small protein                               |                                                    |                      |
| 244                | CIN1                  | Rhizobiaceae | OG8  | 1637885  | 1637969 | +           | tRNA      | C770_GR4Chr1565 | tRNA-Leu                                   |                     |         |             |           |               | OG1                  | 1636263                | 1636406 | -             | CDS                     | C770_GR4Chr1564 | putative conserved small protein                               |                                                    |                      |
| 245                | CIN1                  | Rhizobiaceae | OG8  | 1637885  | 1637969 | +           | tRNA      | C770_GR4Chr1565 | tRNA-Leu                                   |                     |         |             |           |               | OG11                 | 140510                 | 141193  | -             | CDS                     | C770_GR4pD0121  | RNA polymerase sigma factor, sigma-70 family                   |                                                    |                      |
| 246                | CIN4                  | Rhizobiaceae | OG10 | 141613   | 141897  | +           | CDS       | C770_GR4pD0122  | Acylphosphatase                            |                     |         |             |           |               |                      | 532183                 | 532512  | +             | CDS                     | BN406_04042     | hypothetical protein                                           |                                                    |                      |
| 247                |                       | Rhizobiaceae |      | 533163   | 533903  | -           | CDS       | BN406_04043     | 3-oxoacyl-(acyl-carrier-protein) reductase |                     |         |             |           |               | OG1                  | 1307688                | 1307831 | -             | CDS                     | BN406_01276     | hypothetical protein                                           |                                                    |                      |
| 248                | CIN1                  | Rhizobiaceae | OG8  | 1309308  | 1309392 | +           | tRNA      | BN406_RNA00021  | tRNA-Leu                                   | 1308074             | 1308634 | -           | CDS       | BN406_01277   | hypothetical protein | OG1                    | 1307688 | 1307831       | -                       | CDS             | BN406_01276                                                    | hypothetical protein                               |                      |
| 249                | CIN1                  | Rhizobiaceae | OG8  | 1309308  | 1309392 | +           | tRNA      | BN406_RNA00021  | tRNA-Leu                                   |                     |         |             |           |               | OG12                 | 1308074                | 1308634 | -             | CDS                     | BN406_01277     | hypothetical protein                                           |                                                    |                      |
| 250                | CIN3                  | Rhizobiaceae |      | 3485983  | 3488286 | +           | CDS       | BN406_03311     | cell envelope                              |                     |         |             |           |               | OG12                 | 3484599                | 3485486 | -             | CDS                     | BN406_03310     | hypothetical/global homology                                   |                                                    |                      |
| 251                | CIN4                  | Rhizobiaceae | OG10 | 135464   | 135748  | +           | CDS       | BN406_05204     | Hypothetical/Partial homology              |                     |         |             |           |               | OG11                 | 134361                 | 135044  | -             | CDS                     | BN406_05203     | ECF subfamily RNA polymerase sigma-24 subunit                  |                                                    |                      |
| 252                | CIN1                  | Rhizobiaceae | OG8  | 2000507  | 2000591 | -           | tRNA      | SM11_chr2021    | tRNA-Leu                                   |                     |         |             |           |               | OG1                  | 2002070                | 2002213 | +             | CDS                     | SM11_chr2022    | hypothetical protein                                           |                                                    |                      |
| 253                | CIN3                  | Rhizobiaceae | OG8  | 2000507  | 2000591 | -           | tRNA      | SM11_chr2021    | tRNA-Leu                                   |                     |         |             |           |               | OG1                  | 2002070                | 2002213 | +             | CDS                     | SM11_chr2022    | hypothetical protein                                           |                                                    |                      |
| 254                | CIN3                  | Rhizobiaceae | OG9  | 3713807  | 3716119 | +           | CDS       | SM11_chr3653    | penicillin-binding protein                 |                     |         |             |           |               | OG12                 | 3712432                | 3713355 | -             | CDS                     | SM11_chr3652    | transmembrane protein                                          |                                                    |                      |
| 255                | CIN4                  | Rhizobiaceae | OG10 | 141417   | 141701  | +           | CDS       | SM11_pD0122     | putative acylphosphatase                   | 141167              | 141319  | +           | CDS       | SM11_pD0121   | hypothetical protein | OG11                   | 140314  | 140997        | -                       | CDS             | SM11_pD0120                                                    | RNA polymerase sigma factor, ECF subfamily protein |                      |
| 256                |                       | Rhizobiaceae |      | 108895   | 109353  | -           | CDS       | Atu0104         | hypothetical protein                       | 109363              | 109557  | -           | CDS       | Atu0105       | hypothetical protein |                        | 109823  | 110032        | +                       | CDS             | Atu0106                                                        | cold shock protein                                 |                      |
| 257                |                       | Rhizobiaceae |      | 1831052  | 1831294 | -           | CDS       | Atu4670         | hypothetical protein                       |                     |         |             |           |               |                      | 1831642                | 1832085 | -             | CDS                     | Atu4671         | response regulator                                             |                                                    |                      |
| 258                |                       | Rhizobiaceae |      | 957315   | 957461  | +           | CDS       | Arad_8084       | hypothetical protein                       |                     |         |             |           |               |                      | 957909                 | 958754  | -             | CDS                     | Arad_8086       | hypothetical protein                                           |                                                    |                      |
| 259                |                       | Rhizobiaceae |      | 1921485  | 1921631 | -           | CDS       | Arad_9217       | hypothetical protein                       |                     |         |             |           |               |                      | 1920052                | 1920927 | -             | CDS                     | Arad_9216       | glutathione S-transferase YghU                                 |                                                    |                      |
| 260                |                       | Rhizobiaceae |      | 139226   | 140683  | -           | CDS       | Arad_12193      | Cytochrome c, mono- and diHEME variant     |                     |         |             |           |               |                      | 137950                 | 138255  | +             | CDS                     | Arad_12190      | FAD dependent oxidoreductase                                   |                                                    |                      |
| 261                | CIN1                  | Rhizobiaceae | OG1  | 164384   | 164530  | -           | CDS       | AGROH133_09615  | hypothetical protein                       |                     |         |             |           |               |                      | 163498                 | 163941  | +             | CDS                     | AGROH133_09614  | response regulator                                             |                                                    |                      |
| 262                |                       | Rhizobiaceae |      | 244945   | 247116  | -           | CDS       | AGROH133_09819  | hydroxamate-type ferrisiderophore receptor |                     |         |             |           |               |                      | 243567                 | 244646  | +             | CDS                     | AGROH133_09818  | DNA polymerase IV                                              |                                                    |                      |
| 263                | CIN1                  | Rhizobiaceae | OG1  | 598779   | 598925  | -           | CDS       | Avi_5587        | hypothetical protein                       |                     |         |             |           |               |                      | 597555                 | 598229  | +             | CDS                     | Avi_5586        | hypothetical protein                                           |                                                    |                      |
| 264                |                       | Rhizobiaceae |      | 899428   | 900909  | +           | CDS       | Avi_5890        | sulfate permease                           |                     |         |             |           |               |                      | 901178                 | 902659  | -             | CDS                     | Avi_5891        | siroheme synthase                                              |                                                    |                      |
| 265                |                       | Rhizobiaceae |      | 2794154  | 2794300 | -           | CDS       | Avi_3375        | hypothetical protein                       |                     |         |             |           |               |                      | 2792636                | 2793793 | +             | CDS                     | Avi_3374        | DNA polymerase IV                                              |                                                    |                      |
| 266                | CIN1                  | Bruceiaceae  | OG1  | 1527241  | 1527387 | +           | CDS       | BAA13334_I02542 | hypothetical protein                       |                     |         |             |           |               | OG7                  | 1527593                | 1529029 | +             | CDS                     | BAA13334_I02543 | tRNA:m(5)U-54 methyltransferase                                |                                                    |                      |
| 267                | CIN1                  | Bruceiaceae  | OG1  | 889041   | 889187  | -           | CDS       | BAbS19_I08540   | hypothetical protein                       |                     |         |             |           |               | OG7                  | 887399                 | 888799  | -             | CDS                     | BAbS19_I08530   | tRNA (uracil-5'-methyltransferase Gid                          |                                                    |                      |

| #   | LEFT FLANKING FEATURE |                  |        |         |          |        |             |                   | OVERLAPPING FEATURE                 |           |          |         |             |           |                   |                      | RIGHT FLANKING FEATURE |         |             |           |                   |                                                         |                             |
|-----|-----------------------|------------------|--------|---------|----------|--------|-------------|-------------------|-------------------------------------|-----------|----------|---------|-------------|-----------|-------------------|----------------------|------------------------|---------|-------------|-----------|-------------------|---------------------------------------------------------|-----------------------------|
|     | Cuckoo RNA            | CIN              | Family | OG      | Position | Strand | Region type | Locus tag         | Product                             | OG        | Position | Strand  | Region type | Locus tag | Product           | OG                   | Position               | Strand  | Region type | Locus tag | Product           |                                                         |                             |
| 268 | CIN1                  | Brucellaceae     | OG1    | 890740  | 890886   | -      | CDS         | BruAb1_0907       | hypothetical protein                | OG7       | 889098   | 890498  | -           | CDS       | BruAb1_0906       | OG7                  | 889098                 | 890498  | -           | CDS       | BruAb1_0906       | tRNA (uracil-5)-methyltransferase Gid                   |                             |
| 269 | CIN1                  | Brucellaceae     | OG1    | 867399  | 867545   | -      | CDS         | BCAN_A0909        | hypothetical protein                | OG7       | 865739   | 867139  | -           | CDS       | BCAN_A0908        | OG7                  | 865739                 | 867139  | -           | CDS       | BCAN_A0908        | tRNA (uracil-5)-methyltransferase Gid                   |                             |
| 270 | CIN1                  | Brucellaceae     | OG1    | 185798  | 185944   | +      | CDS         | BCA52141_I0298    | hypothetical protein                | OG7       | 186168   | 187604  | +           | CDS       | BCA52141_I0299    | OG7                  | 186168                 | 187604  | +           | CDS       | BCA52141_I0299    | tRNA (uracil-5)-methyltransferase Gid                   |                             |
| 271 | CIN1                  | Brucellaceae     | OG1    | 890507  | 890653   | -      | CDS         | BMEA_A0934        | hypothetical protein                | OG7       | 888865   | 890265  | -           | CDS       | BMEA_A0933        | OG7                  | 888865                 | 890265  | -           | CDS       | BMEA_A0933        | tRNA (uracil-5)-methyltransferase Gid                   |                             |
| 272 | CIN1                  | Brucellaceae     | OG1    | 890452  | 890598   | -      | CDS         | BM28_A0905        | hypothetical protein                | OG7       | 888810   | 890246  | -           | CDS       | BM28_A0904        | OG7                  | 888810                 | 890246  | -           | CDS       | BM28_A0904        | tRNA (uracil-5)-methyltransferase Gid                   |                             |
| 273 | CIN1                  | Brucellaceae     | OG1    | 890766  | 890912   | -      | CDS         | BM590_A0904       | hypothetical protein                | OG7       | 888971   | 890524  | -           | CDS       | BM590_A0903       | OG7                  | 888971                 | 890524  | -           | CDS       | BM590_A0903       | hypothetical protein                                    |                             |
| 274 | CIN1                  | Brucellaceae     | OG1    | 887035  | 887181   | -      | CDS         | BMNI_I0882        | hypothetical protein                | OG7       | 885393   | 886829  | -           | CDS       | BMNI_I0881        | OG7                  | 885393                 | 886829  | -           | CDS       | BMNI_I0881        | hypothetical protein                                    |                             |
| 275 | CIN1                  | Brucellaceae     | OG1    | 887018  | 887164   | -      | CDS         | BAB1_0914         | hypothetical protein                | OG7       | 885376   | 886776  | -           | CDS       | BAB1_0913         | OG7                  | 885376                 | 886776  | -           | CDS       | BAB1_0913         | tRNA (uracil-5)-methyltransferase Gid                   |                             |
| 276 | CIN1                  | Brucellaceae     | OG1    | 1116469 | 1116615  | +      | CDS         | BMEI1072          | hypothetical protein                | OG7       | 1116821  | 1118257 | +           | CDS       | BMEI1073          | OG7                  | 1116821                | 1118257 | +           | CDS       | BMEI1073          | tRNA (uracil-5)-methyltransferase Gid                   |                             |
| 277 | CIN1                  | Brucellaceae     | OG1    | 873231  | 873377   | -      | CDS         | BMI_I893          | hypothetical protein                | OG7       | 871571   | 872971  | -           | CDS       | BMI_I892          | OG7                  | 871571                 | 872971  | -           | CDS       | BMI_I892          | tRNA (uracil-5)-methyltransferase Gid                   |                             |
| 278 | CIN1                  | Brucellaceae     | OG1    | 895931  | 896077   | -      | CDS         | BOV_0891          | hypothetical protein                | OG7       | 894271   | 895671  | -           | CDS       | BOV_0890          | OG7                  | 894271                 | 895671  | -           | CDS       | BOV_0890          | tRNA (uracil-5)-methyltransferase Gid                   |                             |
| 279 | CIN1                  | Brucellaceae     | OG1    | 897467  | 897613   | -      | CDS         | BPI_I934          | hypothetical protein                | OG7       | 895807   | 897207  | -           | CDS       | BPI_I933          | OG7                  | 895807                 | 897207  | -           | CDS       | BPI_I933          | tRNA (uracil-5)-methyltransferase Gid                   |                             |
| 280 | CIN1                  | Brucellaceae     | OG1    | 869015  | 869161   | -      | CDS         | BS1330_I0891      | hypothetical protein                | OG7       | 867355   | 868755  | -           | CDS       | BS1330_I0890      | OG7                  | 867355                 | 868755  | -           | CDS       | BS1330_I0890      | tRNA (uracil-5)-methyltransferase Gid                   |                             |
| 281 | CIN1                  | Brucellaceae     | OG1    | 888895  | 889041   | -      | CDS         | BSUIS_A0934       | hypothetical protein                | OG7       | 887235   | 888635  | -           | CDS       | BSUIS_A0933       | OG7                  | 887235                 | 888635  | -           | CDS       | BSUIS_A0933       | tRNA (uracil-5)-methyltransferase Gid                   |                             |
| 282 | CIN1                  | Brucellaceae     | OG1    | 868982  | 869128   | -      | CDS         | BSVB122_A0891     | hypothetical protein                | OG7       | 867322   | 868722  | -           | CDS       | BSVB122_A0890     | OG7                  | 867322                 | 868722  | -           | CDS       | BSVB122_A0890     | tRNA (uracil-5)-methyltransferase Gid                   |                             |
| 283 | CIN1                  | Rhodobacteraceae | OG1    | 253412  | 253627   | -      | CDS         | OB2597_16115      | hypothetical protein                | OG17      | 250382   | 252970  | +           | CDS       | OB2597_16110      | OG17                 | 250382                 | 252970  | +           | CDS       | OB2597_16110      | Putative uvrD/DNA Helicase II                           |                             |
| 284 | CIN1                  | Brucellaceae     | OG1    | 2453758 | 2453904  | +      | CDS         | Oant_2332         | hypothetical protein                | OG7       | 2454171  | 2455601 | +           | CDS       | Oant_2333         | OG7                  | 2454171                | 2455601 | +           | CDS       | Oant_2333         | tRNA (uracil-5)-methyltransferase Gid                   |                             |
| 285 |                       | Rhodobacteraceae |        | 1086993 | 1087208  | -      | CDS         | OAN307_c10930     | hypothetical protein                |           | 1085366  | 1086547 | +           | CDS       | OAN307_c10920     |                      | 1085366                | 1086547 | +           | CDS       | OAN307_c10920     | putative phytanoyl-CoA dioxygenase                      |                             |
| 286 |                       | Rhodobacteraceae |        | 1955857 | 1956072  | -      | CDS         | OAN307_c19550     | hypothetical protein                |           | 1953763  | 1955376 | -           | CDS       | OAN307_c19540     |                      | 1953763                | 1955376 | -           | CDS       | OAN307_c19540     | GMC oxidoreductase                                      |                             |
| 287 |                       | Rhodobacteraceae |        | 1993118 | 1993552  | +      | CDS         | OAN307_c19940     | UV-repair and mutation protein Umud |           | 1991682  | 1991852 | +           | CDS       | OAN307_c19930     |                      | 1991682                | 1991852 | +           | CDS       | OAN307_c19930     | hypothetical protein                                    |                             |
| 288 |                       | Rhodobacteraceae |        | 3698516 | 3698731  | +      | CDS         | OAN307_c37600     | hypothetical protein                |           | 3700041  | 3700493 | -           | CDS       | OAN307_c37610     |                      | 3700041                | 3700493 | -           | CDS       | OAN307_c37610     | putative IS3-family mobile element-associated integrase |                             |
| 289 |                       | Rhodobacteraceae |        | 671570  | 672592   | -      | CDS         | OA238_c06440      | ketol-acid reductoisomerase IlvC    |           | 669138   | 670139  | -           | CDS       | OA238_c06430      |                      | 669138                 | 670139  | -           | CDS       | OA238_c06430      | hypothetical protein                                    |                             |
| 290 |                       | Rhodobacteraceae |        | 2783742 | 2784656  | +      | CDS         | OA238_c26190      | integrase/recombinase               |           | 2787435  | 2788697 | +           | CDS       | OA238_c26210      |                      | 2787435                | 2788697 | +           | CDS       | OA238_c26210      | MFS-type transporter protein                            |                             |
| 291 |                       | Rhodobacteraceae |        | 3178924 | 3179139  | +      | CDS         | OA238_c29930      | hypothetical protein                |           | 3179935  | 3180480 | -           | CDS       | OA238_c29940      |                      | 3179935                | 3180480 | -           | CDS       | OA238_c29940      | hypothetical protein                                    |                             |
| 292 | CIN1                  | Rhodobacteraceae | OG1    | 2655172 | 2655465  | +      | CDS         | JCM7686_2554      | hypothetical protein                |           | 2655721  | 2656617 | +           | CDS       | JCM7686_2555      |                      | 2655721                | 2656617 | +           | CDS       | JCM7686_2555      | hypothetical protein                                    |                             |
| 293 | CIN1                  | Rhodobacteraceae | OG1    | 2655172 | 2655465  | +      | CDS         | JCM7686_2554      | hypothetical protein                | Cluster44 | 2655721  | 2656617 | +           | CDS       | JCM7686_2555      | hypothetical protein |                        | 2656642 | 2657070     | -         | CDS               | JCM7686_2556                                            | formaldehyde-activating GFA |
| 294 | CIN1                  | Rhodobacteraceae | OG1    | 551716  | 552015   | -      | CDS         | Pden_0580         | hypothetical protein                |           | 550394   | 551167  | -           | CDS       | Pden_0579         |                      | 550394                 | 551167  | -           | CDS       | Pden_0579         | hypothetical protein                                    |                             |
| 295 |                       | Rhodobacteraceae |        | 2332239 | 2332388  | -      | CDS         | SLO038_2211       | hypothetical protein                |           | 2331701  | 2331850 | -           | CDS       | SLO038_2210       |                      | 2331701                | 2331850 | -           | CDS       | SLO038_2210       | hypothetical protein                                    |                             |
| 296 |                       | Rhodobacteraceae |        | 3461175 | 3461318  | -      | CDS         | PSE_3225          | hypothetical protein                |           | 3461660  | 3462184 | -           | CDS       | PSE_3226          |                      | 3461660                | 3462184 | -           | CDS       | PSE_3226          | hypothetical protein                                    |                             |
| 297 |                       | Rhizobiaceae     |        | 76971   | 77354    | +      | CDS         | RHE_PD00068       | hypothetical protein                |           | 77912    | 78484   | +           | CDS       | RHE_PD00069       |                      | 77912                  | 78484   | +           | CDS       | RHE_PD00069       | hypothetical protein                                    |                             |
| 298 | CIN1                  | Rhizobiaceae     | OG1    | 443336  | 443482   | -      | CDS         | RHE_PE00401       | hypothetical protein                | OG19      | 441962   | 442798  | -           | CDS       | RHE_PE00400       | OG19                 | 441962                 | 442798  | -           | CDS       | RHE_PE00400       | 5-keto-4-deoxyuronate isomerase                         |                             |
| 299 |                       | Rhizobiaceae     |        | 1172125 | 1173279  | -      | CDS         | RHECIAT_CH0001166 | polyhydroxybutyrate depolymerase    |           | 1173597  | 1173884 | -           | CDS       | RHECIAT_CH0001167 | hypothetical protein |                        | 1173948 | 1174214     | +         | CDS               | RHECIAT_CH0001168                                       | hypothetical protein        |
| 300 |                       | Rhizobiaceae     |        | 111975  | 112217   | -      | CDS         | RHECIAT_PB0000101 | hypothetical protein                |           | 112536   | 113108  | +           | CDS       | RHECIAT_PB0000102 |                      | 112536                 | 113108  | +           | CDS       | RHECIAT_PB0000102 | hypothetical protein                                    |                             |
| 301 | CIN1                  | Rhizobiaceae     | OG1    | 346130  | 346366   | -      | CDS         | RHECIAT_PA0000320 | hypothetical protein                | OG19      | 344808   | 345644  | -           | CDS       | RHECIAT_PA0000319 | OG19                 | 344808                 | 345644  | -           | CDS       | RHECIAT_PA0000319 | 5-keto-4-deoxyuronate isomerase                         |                             |

| #<br>Cuckoo<br>RNA | LEFT FLANKING FEATURE |                  |     |          |         |             |           |                   | OVERLAPPING FEATURE                  |          |        |             |           |           |                      | RIGHT FLANKING FEATURE |         |             |           |                   |                                                              |                                 |
|--------------------|-----------------------|------------------|-----|----------|---------|-------------|-----------|-------------------|--------------------------------------|----------|--------|-------------|-----------|-----------|----------------------|------------------------|---------|-------------|-----------|-------------------|--------------------------------------------------------------|---------------------------------|
|                    | CIN                   | Family           | OG  | Position | Strand  | Region type | Locus tag | Product           | OG                                   | Position | Strand | Region type | Locus tag | Product   | OG                   | Position               | Strand  | Region type | Locus tag | Product           |                                                              |                                 |
| 302                | CIN1                  | Rhizobiaceae     | OG1 | 450047   | 450193  | -           | CDS       | REMIM1_PD00423    | hypothetical protein                 |          |        |             |           |           | OG19                 | 448675                 | 449511  | -           | CDS       | REMIM1_PD00421    | 4-deoxy-L-threo-5-hexosulose-uronate ketol-isomerase         |                                 |
| 303                |                       | Rhizobiaceae     |     | 264545   | 265168  | -           | CDS       | Rleg_4882         | plasmid pRIA4b ORF-3 family protein  |          |        |             |           |           |                      | 268316                 | 268603  | -           | CDS       | Rleg_4886         | hypothetical protein                                         |                                 |
| 304                | CIN1                  | Rhizobiaceae     | OG1 | 118943   | 119089  | +           | CDS       | Rleg_6084         | hypothetical protein                 |          |        |             |           |           |                      | 119664                 | 120056  | -           | CDS       | Rleg_6085         | hypothetical protein                                         |                                 |
| 305                |                       | Rhizobiaceae     |     | 2547     | 2873    | -           | CDS       | Rleg_6289         | hypothetical protein                 |          |        |             |           |           |                      | 122                    | 1300    | +           | CDS       | Rleg_6287         | hypothetical protein                                         |                                 |
| 306                | CIN1                  | Rhizobiaceae     | OG1 | 28280    | 28426   | +           | CDS       | Rleg_6602         | hypothetical protein                 |          |        |             |           |           | OG19                 | 29055                  | 29891   | +           | CDS       | Rleg_6603         | 5-keto-4-deoxyuronate isomerase                              |                                 |
| 307                | CIN1                  | Rhizobiaceae     | OG1 | 50447    | 50593   | +           | CDS       | Rleg2_5661        | hypothetical protein                 |          |        |             |           |           | OG19                 | 51199                  | 52035   | +           | CDS       | Rleg2_5662        | 5-keto-4-deoxyuronate isomerase                              |                                 |
| 308                |                       | Rhizobiaceae     |     | 607180   | 607512  | +           | CDS       | Rleg2_4962        | hypothetical protein                 |          |        |             |           |           |                      | 609168                 | 609533  | +           | CDS       | Rleg2_4966        | hypothetical protein                                         |                                 |
| 309                | CIN1                  | Rhizobiaceae     | OG1 | 574811   | 574957  | -           | CDS       | pRL110532         | hypothetical protein                 | 574203   | 574637 | -           | CDS       | pRL110531 | hypothetical protein | OG19                   | 573348  | 574184      | -         | CDS               | pRL110530                                                    | 5-keto-4-deoxyuronate isomerase |
| 310                | CIN1                  | Rhizobiaceae     | OG1 | 1037924  | 1038070 | +           | CDS       | RTC1AT899_PC04885 | hypothetical protein                 |          |        |             |           |           |                      | 1038634                | 1039509 | +           | CDS       | RTC1AT899_PC04890 | glutathione S-transferase family protein                     |                                 |
| 311                |                       | Rhizobiaceae     |     | 313859   | 314596  | -           | CDS       | Smed_5352         | putative adenylate/guanylate cyclase |          |        |             |           |           |                      | 316485                 | 317621  | -           | CDS       | Smed_5353         | DNA polymerase IV                                            |                                 |
| 312                | CIN1                  | Rhizobiaceae     | OG1 | 338535   | 338681  | +           | CDS       | Smed_5370         | hypothetical protein                 |          |        |             |           |           |                      | 339017                 | 339226  | -           | CDS       | Smed_5371         | hypothetical protein                                         |                                 |
| 313                |                       | Rhizobiaceae     |     | 1329978  | 1330670 | +           | CDS       | SMA2357           | Global functions                     |          |        |             |           |           |                      | 1327042                | 1328151 | +           | CDS       | SMA2355           | Protection responses                                         |                                 |
| 314                |                       | Rhizobiaceae     |     | 1328315  | 1329007 | +           | CDS       | SM2011_a2357      | adenylate/guanylate cyclase          |          |        |             |           |           |                      | 1325379                | 1326488 | +           | CDS       | SM2011_a2355      | DNA polymerase IV                                            |                                 |
| 315                |                       | Rhizobiaceae     |     | 251307   | 251429  | -           | CDS       | Sinme_5530        | hypothetical protein                 |          |        |             |           |           |                      | 252215                 | 253351  | -           | CDS       | Sinme_5531        | DNA-directed DNA polymerase                                  |                                 |
| 316                |                       | Rhizobiaceae     |     | 293847   | 293969  | +           | CDS       | SinmeB_5363       | hypothetical protein                 |          |        |             |           |           |                      | 291959                 | 293068  | +           | CDS       | SinmeB_5362       | DNA-directed DNA polymerase                                  |                                 |
| 317                |                       | Rhizobiaceae     |     | 23436    | 23558   | -           | CDS       | C770_GR4pC0025    | hypothetical protein                 |          |        |             |           |           |                      | 24336                  | 25445   | -           | CDS       | C770_GR4pC0026    | Nucleotidyltransferase/DNA polymerase involved in DNA repair |                                 |
| 318                |                       | Rhizobiaceae     |     | 25550    | 25672   | -           | CDS       | BN406_03525       | hypothetical protein                 |          |        |             |           |           |                      | 26450                  | 27586   | -           | CDS       | BN406_03526       | DNA polymerase IV 2                                          |                                 |
| 319                |                       | Rhizobiaceae     |     | 27984    | 28274   | -           | CDS       | SM11_pC0027       | hypothetical protein                 |          |        |             |           |           |                      | 29344                  | 30480   | -           | CDS       | SM11_pC0028       | Nucleotidyltransferase/DNA polymerase                        |                                 |
| 320                | CIN1                  | Rhodobacteraceae | OG1 | 574330   | 574542  | +           | CDS       | EE36_17032        | hypothetical protein                 |          |        |             |           |           | OG17                 | 574763                 | 577183  | -           | CDS       | EE36_17037        | DNA helicase II, putative                                    |                                 |
| 321                | CIN1                  | Rhodobacteraceae | OG1 | 477730   | 477942  | +           | CDS       | NAS141_07248      | hypothetical protein                 |          |        |             |           |           | OG17                 | 478163                 | 480583  | -           | CDS       | NAS141_07253      | DNA helicase II, putative                                    |                                 |

**Table S3.** Structure properties of cuckoo RNAs.

| # Cuckoo RNA | Energy cuckoo TDM | MFE (RNAfold -d2) | Energy TDM / MFE | Abstract shape TDM structure | Abstract shape MFE structure | TDM hairpin centers | MFE hairpin centers | TDM structure and cuckoo motifs                              | MFE structure                       |
|--------------|-------------------|-------------------|------------------|------------------------------|------------------------------|---------------------|---------------------|--------------------------------------------------------------|-------------------------------------|
| 1            | -22.7             | -21.7             | 1.05             | □□                           | □□                           | 19;59               | 19;59               | (((((.....cucucucc.....)))))).....(((.....ucucucc.....)))))) | (((((.....)))))).....(((.....)))))) |
| 2            | -22.7             | -21.7             | 1.05             | □□                           | □□                           | 19;59               | 19;59               | (((((.....cucucucc.....)))))).....(((.....ucucucc.....)))))) | (((((.....)))))).....(((.....)))))) |
| 3            | -22.7             | -21.7             | 1.05             | □□                           | □□                           | 19;59               | 19;59               | (((((.....cucucucc.....)))))).....(((.....ucucucc.....)))))) | (((((.....)))))).....(((.....)))))) |
| 4            | -19.5             | -17.9             | 1.09             | □□                           | □□                           | 19;54               | 19;54               | (((((.....cucucucc.....)))))).....(((.....ucucucc.....)))))) | (((((.....)))))).....(((.....)))))) |
| 5            | -19.5             | -17.9             | 1.09             | □□                           | □□                           | 19;54               | 19;54               | (((((.....cucucucc.....)))))).....(((.....ucucucc.....)))))) | (((((.....)))))).....(((.....)))))) |
| 6            | -23.2             | -22.2             | 1.05             | □□                           | □□                           | 19;60.5             | 19;60.5             | (((((.....cucucucc.....)))))).....(((.....ucucucc.....)))))) | (((((.....)))))).....(((.....)))))) |
| 7            | -23.2             | -22.2             | 1.05             | □□                           | □□                           | 19;60.5             | 19;60.5             | (((((.....cucucucc.....)))))).....(((.....ucucucc.....)))))) | (((((.....)))))).....(((.....)))))) |
| 8            | -23.1             | -22.1             | 1.05             | □□                           | □□                           | 19;61               | 19;61               | (((((.....cucucucc.....)))))).....(((.....ucucucc.....)))))) | (((((.....)))))).....(((.....)))))) |
| 9            | -23.2             | -22.2             | 1.05             | □□                           | □□                           | 19;60               | 19;60               | (((((.....cucucucc.....)))))).....(((.....ucucucc.....)))))) | (((((.....)))))).....(((.....)))))) |
| 10           | -22.7             | -21.7             | 1.05             | □□                           | □□                           | 19;59               | 19;59               | (((((.....cucucucc.....)))))).....(((.....ucucucc.....)))))) | (((((.....)))))).....(((.....)))))) |
| 11           | -22.1             | -20.5             | 1.08             | □□                           | □□                           | 19;54               | 19;54               | (((((.....cucucucc.....)))))).....(((.....ucucucc.....)))))) | (((((.....)))))).....(((.....)))))) |
| 12           | -23.1             | -22.1             | 1.05             | □□                           | □□                           | 19;61               | 19;61               | (((((.....cucucucc.....)))))).....(((.....ucucucc.....)))))) | (((((.....)))))).....(((.....)))))) |
| 13           | -26.8             | -25.2             | 1.06             | □□                           | □□                           | 19;54               | 19;54               | (((((.....cucucucc.....)))))).....(((.....ucucucc.....)))))) | (((((.....)))))).....(((.....)))))) |
| 14           | -22.1             | -20.5             | 1.08             | □□                           | □□                           | 19;54               | 19;54               | (((((.....cucucucc.....)))))).....(((.....ucucucc.....)))))) | (((((.....)))))).....(((.....)))))) |
| 15           | -29.3             | -28.4             | 1.03             | □□                           | □□                           | 19;59               | 19;59               | (((((.....cucucucc.....)))))).....(((.....ucucucc.....)))))) | (((((.....)))))).....(((.....)))))) |
| 16           | -29.1             | -28.2             | 1.03             | □□                           | □□                           | 19;61               | 19;61               | (((((.....cucucucc.....)))))).....(((.....ucucucc.....)))))) | (((((.....)))))).....(((.....)))))) |
| 17           | -29.0             | -28.1             | 1.03             | □□                           | □□                           | 19;62               | 19;62               | (((((.....cucucucc.....)))))).....(((.....ucucucc.....)))))) | (((((.....)))))).....(((.....)))))) |
| 18           | -28.9             | -28.0             | 1.03             | □□                           | □□                           | 19;63.5             | 19;63.5             | (((((.....cucucucc.....)))))).....(((.....ucucucc.....)))))) | (((((.....)))))).....(((.....)))))) |
| 19           | -29.3             | -28.4             | 1.03             | □□                           | □□                           | 19;59               | 19;59               | (((((.....cucucucc.....)))))).....(((.....ucucucc.....)))))) | (((((.....)))))).....(((.....)))))) |
| 20           | -28.9             | -28.0             | 1.03             | □□                           | □□                           | 19;63.5             | 19;63.5             | (((((.....cucucucc.....)))))).....(((.....ucucucc.....)))))) | (((((.....)))))).....(((.....)))))) |
| 21           | -35.5             | -38.0             | 0.93             | □□                           | □□                           | 15;51               | 15;51               | (((((.....cucucucc.....)))))).....(((.....ucucucc.....)))))) | (((((.....)))))).....(((.....)))))) |
| 22           | -39.6             | -40.2             | 0.99             | □□                           | □□                           | 14;52.5             | 14;52.5             | (((((.....ucucucc.....)))))).....(((.....ucucucc.....))))))  | (((((.....)))))).....(((.....)))))) |
| 23           | -35.1             | -34.5             | 1.02             | □□                           | □□                           | 15.5;54.5           | 15.5;54.5           | (((((.....cucucucc.....)))))).....(((.....ucucucc.....)))))) | (((((.....)))))).....(((.....)))))) |
| 24           | -29.3             | -28.2             | 1.04             | □□                           | □□                           | 15.5;54             | 15.5;54             | (((((.....ucucucc.....)))))).....(((.....ucucucc.....))))))  | (((((.....)))))).....(((.....)))))) |
| 25           | -25.6             | -25.1             | 1.02             | □□                           | □□                           | 16.5;58             | 16.5;58             | (((((.....ucucucc.....)))))).....(((.....ucucucc.....))))))  | (((((.....)))))).....(((.....)))))) |
| 26           | -42.1             | -43.2             | 0.97             | □□                           | □□                           | 15.5;57.5           | 15.5;57             | (((((.....ucucucc.....)))))).....(((.....ucucucc.....))))))  | (((((.....)))))).....(((.....)))))) |
| 27           | -35.9             | -35.2             | 1.02             | □□                           | □□                           | 18.5;57.5           | 18.5;57.5           | (((((.....cucucucc.....)))))).....(((.....ucucucc.....)))))) | (((((.....)))))).....(((.....)))))) |
| 28           | -41.0             | -41.3             | 0.99             | □□                           | □□                           | 20.5;69.5           | 20.5;69.5           | (((((.....cucucucc.....)))))).....(((.....ucucucc.....)))))) | (((((.....)))))).....(((.....)))))) |
| 29           | -33.3             | -33.3             | 1.00             | □□                           | □□                           | 18.5;58.5           | 18.5;58.5           | (((((.....cucucucc.....)))))).....(((.....ucucucc.....)))))) | (((((.....)))))).....(((.....)))))) |
| 30           | -45.8             | -47.1             | 0.97             | □□                           | □□                           | 20.5;69.5           | 20.5;69.5           | (((((.....cucucucc.....)))))).....(((.....ucucucc.....)))))) | (((((.....)))))).....(((.....)))))) |
| 31           | -39.1             | -38.0             | 1.03             | □□                           | □□                           | 17;57               | 17;57               | (((((.....cucucucc.....)))))).....(((.....ucucucc.....)))))) | (((((.....)))))).....(((.....)))))) |
| 32           | -33.3             | -32.7             | 1.02             | □□                           | □□                           | 18;58.5             | 18;58.5             | (((((.....cucucucc.....)))))).....(((.....ucucucc.....)))))) | (((((.....)))))).....(((.....)))))) |
| 33           | -38.0             | -36.7             | 1.04             | □□                           | □□                           | 17;54               | 17;54               | (((((.....cucucucc.....)))))).....(((.....ucucucc.....)))))) | (((((.....)))))).....(((.....)))))) |
| 34           | -44.0             | -42.2             | 1.04             | □□                           | □□□                          | 21;76               | 21;48;76            | (((((.....cucucucc.....)))))).....(((.....ucucucc.....)))))) | (((((.....)))))).....(((.....)))))) |
| 35           | -36.7             | -36.7             | 1.00             | □□                           | □□                           | 22;73.5             | 22;73.5             | (((((.....cucucucc.....)))))).....(((.....ucucucc.....)))))) | (((((.....)))))).....(((.....)))))) |
| 36           | -38.2             | -38.8             | 0.98             | □□                           | □□                           | 19;69               | 19;69               | (((((.....cucucucc.....)))))).....(((.....ucucucc.....)))))) | (((((.....)))))).....(((.....)))))) |
| 37           | -34.2             | -38.9             | 0.88             | □□                           | □□                           | 14.5;58.5           | 16.5;58.5           | (((((.....ucucucc.....)))))).....(((.....ucucucc.....))))))  | (((((.....)))))).....(((.....)))))) |
| 38           | -34.1             | -39.5             | 0.86             | □□                           | □□                           | 23.5;63.5           | 23.5;63.5           | (((((.....ucucucc.....)))))).....(((.....ucucucc.....))))))  | (((((.....)))))).....(((.....)))))) |



| # Cuckoo RNA | Energy cuckoo TDM | MFE (RNAfold -d2) | Energy TDM / MFE | Abstract shape TDM structure | Abstract shape MFE structure | TDM hairpin centers | MFE hairpin centers | TDM structure and cuckoo motifs                                 | MFE structure                             |
|--------------|-------------------|-------------------|------------------|------------------------------|------------------------------|---------------------|---------------------|-----------------------------------------------------------------|-------------------------------------------|
| 39           | -35.7             | -40.9             | 0.87             | □□                           | □□                           | 22.5;62.5           | 22.5;62.5           | (((((.....(((ucucucc))))))))).....(((.....(((ucucucc))))))..... | ((.....(((.....)))).....(((.....))))..... |
| 40           | -23.1             | -23.3             | 0.99             | □□                           | □□                           | 19;58.5             | 21.5;58.5           | ((.....(((ucucucc)))).....(((.....(((ucucucc)))).....           | ((.....(((.....)))).....(((.....))))..... |
| 41           | -32.3             | -31.2             | 1.04             | □□                           | □□                           | 18.5;60.5           | 18.5;60.5           | ((.....(((ucucucc)))).....(((.....(((ucucucc)))).....           | ((.....(((.....)))).....(((.....))))..... |
| 42           | -45.5             | -44.9             | 1.01             | □□                           | □□                           | 20.5;60             | 20.5;60             | ((.....(((ucucucc)))).....(((.....(((ucucucc)))).....           | ((.....(((.....)))).....(((.....))))..... |
| 43           | -41.9             | -41.8             | 1.00             | □□                           | □□                           | 14.5;54             | 14.5;54             | ((.....(((ucucucc)))).....(((.....(((ucucucc)))).....           | ((.....(((.....)))).....(((.....))))..... |
| 44           | -37.7             | -37.0             | 1.02             | □□                           | □□                           | 15.5;55             | 15.5;55             | ((.....(((ucucucc)))).....(((.....(((ucucucc)))).....           | ((.....(((.....)))).....(((.....))))..... |
| 45           | -40.2             | -39.4             | 1.02             | □□                           | □□                           | 19.5;58             | 19.5;58             | ((.....(((ucucucc)))).....(((.....(((ucucucc)))).....           | ((.....(((.....)))).....(((.....))))..... |
| 46           | -40.9             | -40.4             | 1.01             | □□                           | □□                           | 18;62               | 18;62               | ((.....(((ucucucc)))).....(((.....(((ucucucc)))).....           | ((.....(((.....)))).....(((.....))))..... |
| 47           | -40.6             | -40.0             | 1.02             | □□                           | □□                           | 16;57.5             | 16;57.5             | ((.....(((ucucucc)))).....(((.....(((ucucucc)))).....           | ((.....(((.....)))).....(((.....))))..... |
| 48           | -35.6             | -34.8             | 1.02             | □□                           | □□                           | 21;59.5             | 21;59.5             | ((.....(((ucucucc)))).....(((.....(((ucucucc)))).....           | ((.....(((.....)))).....(((.....))))..... |
| 49           | -42.2             | -41.1             | 1.03             | □□                           | □□                           | 16.5;58.5           | 16.5;58.5           | ((.....(((ucucucc)))).....(((.....(((ucucucc)))).....           | ((.....(((.....)))).....(((.....))))..... |
| 50           | -35.6             | -34.8             | 1.02             | □□                           | □□                           | 21;59.5             | 21;59.5             | ((.....(((ucucucc)))).....(((.....(((ucucucc)))).....           | ((.....(((.....)))).....(((.....))))..... |
| 51           | -39.2             | -39.0             | 1.01             | □□                           | □□                           | 17;60               | 17;60               | ((.....(((ucucucc)))).....(((.....(((ucucucc)))).....           | ((.....(((.....)))).....(((.....))))..... |
| 52           | -31.1             | -33.9             | 0.92             | □□                           | □□□                          | 21.5;74             | 21.5;45;74          | ((.....(((ucucucc)))).....(((.....(((ucucucc)))).....           | ((.....(((.....)))).....(((.....))))..... |
| 53           | -43.1             | -42.5             | 1.01             | □□                           | □□                           | 21;60               | 21;60               | ((.....(((ucucucc)))).....(((.....(((ucucucc)))).....           | ((.....(((.....)))).....(((.....))))..... |
| 54           | -42.8             | -42.0             | 1.02             | □□                           | □□                           | 16;55.5             | 16;55.5             | ((.....(((ucucucc)))).....(((.....(((ucucucc)))).....           | ((.....(((.....)))).....(((.....))))..... |
| 55           | -39.9             | -39.9             | 1.00             | □□                           | □□                           | 15;48.5             | 15;48.5             | ((.....(((ucucucc)))).....(((.....(((ucucucc)))).....           | ((.....(((.....)))).....(((.....))))..... |
| 56           | -41.5             | -41.3             | 1.00             | □□                           | □□                           | 18;57               | 18;57               | ((.....(((ucucucc)))).....(((.....(((ucucucc)))).....           | ((.....(((.....)))).....(((.....))))..... |
| 57           | -45.0             | -44.0             | 1.02             | □□                           | □□                           | 19.5;58.5           | 19.5;58.5           | ((.....(((ucucucc)))).....(((.....(((ucucucc)))).....           | ((.....(((.....)))).....(((.....))))..... |
| 58           | -45.0             | -44.0             | 1.02             | □□                           | □□                           | 19.5;58.5           | 19.5;58.5           | ((.....(((ucucucc)))).....(((.....(((ucucucc)))).....           | ((.....(((.....)))).....(((.....))))..... |
| 59           | -45.0             | -44.0             | 1.02             | □□                           | □□                           | 19.5;58.5           | 19.5;58.5           | ((.....(((ucucucc)))).....(((.....(((ucucucc)))).....           | ((.....(((.....)))).....(((.....))))..... |
| 60           | -45.0             | -44.0             | 1.02             | □□                           | □□                           | 19.5;58.5           | 19.5;58.5           | ((.....(((ucucucc)))).....(((.....(((ucucucc)))).....           | ((.....(((.....)))).....(((.....))))..... |
| 61           | -43.5             | -42.5             | 1.02             | □□                           | □□                           | 20.5;59.5           | 20.5;59.5           | ((.....(((ucucucc)))).....(((.....(((ucucucc)))).....           | ((.....(((.....)))).....(((.....))))..... |
| 62           | -36.8             | -36.0             | 1.02             | □□                           | □□                           | 17;54.5             | 17;54.5             | ((.....(((ucucucc)))).....(((.....(((ucucucc)))).....           | ((.....(((.....)))).....(((.....))))..... |
| 63           | -38.9             | -37.9             | 1.03             | □□                           | □□                           | 16.5;55             | 16.5;55             | ((.....(((ucucucc)))).....(((.....(((ucucucc)))).....           | ((.....(((.....)))).....(((.....))))..... |
| 64           | -47.5             | -46.1             | 1.03             | □□                           | □□                           | 19.5;59             | 19.5;59             | ((.....(((ucucucc)))).....(((.....(((ucucucc)))).....           | ((.....(((.....)))).....(((.....))))..... |
| 65           | -45.5             | -44.9             | 1.01             | □□                           | □□                           | 19.5;59             | 19.5;59             | ((.....(((ucucucc)))).....(((.....(((ucucucc)))).....           | ((.....(((.....)))).....(((.....))))..... |
| 66           | -36.7             | -35.6             | 1.03             | □□                           | □□                           | 18.5;56.5           | 18.5;56.5           | ((.....(((ucucucc)))).....(((.....(((ucucucc)))).....           | ((.....(((.....)))).....(((.....))))..... |
| 67           | -38.2             | -37.9             | 1.01             | □□                           | □□                           | 16.5;55             | 16.5;55             | ((.....(((ucucucc)))).....(((.....(((ucucucc)))).....           | ((.....(((.....)))).....(((.....))))..... |
| 68           | -41.1             | -40.1             | 1.02             | □□                           | □□                           | 19.5;58.5           | 19.5;58.5           | ((.....(((ucucucc)))).....(((.....(((ucucucc)))).....           | ((.....(((.....)))).....(((.....))))..... |
| 69           | -42.3             | -41.3             | 1.02             | □□                           | □□                           | 19.5;58.5           | 19.5;58.5           | ((.....(((ucucucc)))).....(((.....(((ucucucc)))).....           | ((.....(((.....)))).....(((.....))))..... |
| 70           | -42.3             | -41.3             | 1.02             | □□                           | □□                           | 19.5;58.5           | 19.5;58.5           | ((.....(((ucucucc)))).....(((.....(((ucucucc)))).....           | ((.....(((.....)))).....(((.....))))..... |
| 71           | -45.0             | -44.0             | 1.02             | □□                           | □□                           | 19.5;58.5           | 19.5;58.5           | ((.....(((ucucucc)))).....(((.....(((ucucucc)))).....           | ((.....(((.....)))).....(((.....))))..... |
| 72           | -45.0             | -44.0             | 1.02             | □□                           | □□                           | 19.5;58.5           | 19.5;58.5           | ((.....(((ucucucc)))).....(((.....(((ucucucc)))).....           | ((.....(((.....)))).....(((.....))))..... |
| 73           | -45.0             | -44.0             | 1.02             | □□                           | □□                           | 19.5;58.5           | 19.5;58.5           | ((.....(((ucucucc)))).....(((.....(((ucucucc)))).....           | ((.....(((.....)))).....(((.....))))..... |
| 74           | -46.2             | -45.2             | 1.02             | □□                           | □□                           | 20.5;59.5           | 20.5;59.5           | ((.....(((ucucucc)))).....(((.....(((ucucucc)))).....           | ((.....(((.....)))).....(((.....))))..... |
| 75           | -36.8             | -36.0             | 1.02             | □□                           | □□                           | 17;54.5             | 17;54.5             | ((.....(((ucucucc)))).....(((.....(((ucucucc)))).....           | ((.....(((.....)))).....(((.....))))..... |
| 76           | -38.3             | -37.3             | 1.03             | □□                           | □□                           | 16.5;55             | 16.5;55             | ((.....(((ucucucc)))).....(((.....(((ucucucc)))).....           | ((.....(((.....)))).....(((.....))))..... |
| 77           | -45.0             | -44.0             | 1.02             | □□                           | □□                           | 19.5;58.5           | 19.5;58.5           | ((.....(((ucucucc)))).....(((.....(((ucucucc)))).....           | ((.....(((.....)))).....(((.....))))..... |
| 78           | -43.0             | -42.0             | 1.02             | □□                           | □□                           | 19.5;60.5           | 19.5;60.5           | ((.....(((ucucucc)))).....(((.....(((ucucucc)))).....           | ((.....(((.....)))).....(((.....))))..... |

| # Cuckoo RNA | Energy cuckoo TDM | MFE (RNAfold -d2) | Energy TDM / MFE | Abstract shape TDM structure | Abstract shape MFE structure | TDM hairpin centers | MFE hairpin centers | TDM structure and cuckoo motifs                                              | MFE structure                                            |
|--------------|-------------------|-------------------|------------------|------------------------------|------------------------------|---------------------|---------------------|------------------------------------------------------------------------------|----------------------------------------------------------|
| 79           | -43.0             | -42.0             | 1.02             | 00                           | 00                           | 19.5;58.5           | 19.5;58.5           | ((...(((((( (.cucucucc)))))))))-.(((((( (.cucucucc)))))))))                  | ((-(((((( .....)))))))))-.(((((( .....)))))))))          |
| 80           | -42.3             | -41.3             | 1.02             | 00                           | 00                           | 19.5;58.5           | 19.5;58.5           | ((...(((((( (.cucucucc)))))))))-.(((((( (.cucucucc)))))))))                  | ((-(((((( .....)))))))))-.(((((( .....)))))))))          |
| 81           | -46.2             | -45.2             | 1.02             | 00                           | 00                           | 20.5;59.5           | 20.5;59.5           | ((...(((((( (.cucucucc)))))))))-.(((((( (.cucucucc)))))))))                  | ((-(((((( .....)))))))))-.(((((( .....)))))))))          |
| 82           | -36.8             | -36.0             | 1.02             | 00                           | 00                           | 17;54.5             | 17;54.5             | ((((( (.cucucucc...))))))-.(((((( (.cucucucc...)))))))))                     | ((((( (.cucucucc...))))))-.(((((( (.cucucucc...))))))))) |
| 83           | -38.9             | -37.9             | 1.03             | 00                           | 00                           | 16.5;55             | 16.5;55             | ((((( (.cucucucc))))))-.(((((( (.cucucucc)))))))))                           | ((((( (.cucucucc))))))-.(((((( (.cucucucc)))))))))       |
| 84           | -37.3             | -38.2             | 0.98             | 00                           | 00                           | 22;61               | 22.5;61             | ((((( (.cucucucc...))))))-.(((((( (.cucucucc...)))))))))                     | ((((( (.cucucucc...))))))-.(((((( (.cucucucc...))))))))) |
| 85           | -45.8             | -44.8             | 1.02             | 00                           | 00                           | 20.5;62             | 20.5;62             | ((-(((((( (.cucucucc)))))))))-.(((((( (.cucucucc)))))))))                    | ((-(((((( .....)))))))))-.(((((( .....)))))))))          |
| 86           | -33.4             | -34.8             | 0.96             | 00                           | 00                           | 22;61               | 23.5;61             | ((((( (.cucucucc...))))))-.(((((( (.cucucucc...)))))))))                     | ((((( (.cucucucc...))))))-.(((((( (.cucucucc...))))))))) |
| 87           | -42.5             | -41.5             | 1.02             | 00                           | 00                           | 16.5;58             | 16.5;58             | ((((( (.cucucucc))))))-.(((((( (.cucucucc)))))))))                           | ((((( .....))))-.(((((( .....)))))))))                   |
| 88           | -37.1             | -35.5             | 1.05             | 00                           | 00                           | 20.5;64.5           | 20.5;64.5           | ((-(((((( (.cucucucc...)))))))))-.(((((( (.cucucucc...)))))))))              | ((-((( .....))))-.(((((( .....)))))))))                  |
| 89           | -38.6             | -37.5             | 1.03             | 00                           | 00                           | 22.5;70.5           | 22.5;70.5           | ((((( (((((( (.cucucucc...)))))))))-.((( ((( ((( (.cucucucc...)))))))))      | ((((( (((((( .....)))))))))-.((( ((( ((( .....)))))))))  |
| 90           | -43.6             | -43.2             | 1.01             | 00                           | 00                           | 17;59               | 17;59               | ((-((( ((( (.cucucucc)))))))))-.((( ((( ((( (.cucucucc)))))))))              | ((-((( .....))))-.((( ((( .....)))))))))                 |
| 91           | -39.1             | -38.5             | 1.02             | 00                           | 00                           | 16;56               | 16;56               | ((((( ((( (.cucucucc)))))))))-.((( ((( ((( (.cucucucc)))))))))               | ((((( .....))))-.((( ((( .....)))))))))                  |
| 92           | -41.1             | -40.5             | 1.01             | 00                           | 00                           | 15;57               | 15;57               | ((((( ((( (.cucucucc)))))))))-.((( ((( ((( (.cucucucc)))))))))               | ((((( .....))))-.((( ((( .....)))))))))                  |
| 93           | -49.7             | -47.6             | 1.04             | 00                           | 00                           | 22;63               | 22;63               | ((-((( ((( (.cucucucc)))))))))-.((( ((( ((( (.cucucucc)))))))))              | ((-((( .....))))-.((( ((( .....)))))))))                 |
| 94           | -39.8             | -39.2             | 1.02             | 00                           | 00                           | 19;57.5             | 19;57.5             | ((-((( ((( (.cucucucc)))))))))-.((( ((( ((( (.cucucucc)))))))))              | ((-((( .....))))-.((( ((( .....)))))))))                 |
| 95           | -37.7             | -36.0             | 1.05             | 00                           | 00                           | 18.5;57.5           | 18.5;57.5           | ((-((( ((( (.cucucucc)))))))))-.((( ((( ((( (.cucucucc)))))))))              | ((-((( .....))))-.((( ((( .....)))))))))                 |
| 96           | -40.5             | -40.0             | 1.01             | 00                           | 00                           | 16;59               | 16;59               | ((((( ((( (.cucucucc...)))))))))-.((( ((( ((( (.cucucucc...)))))))))         | ((((( .....))))-.((( ((( .....)))))))))                  |
| 97           | -37.2             | -36.6             | 1.02             | 00                           | 00                           | 19;58               | 19;58               | ((((( ((( (.cucucucc)))))))))-.((( ((( ((( (.cucucucc)))))))))               | ((((( .....))))-.((( ((( .....)))))))))                  |
| 98           | -43.4             | -42.6             | 1.02             | 00                           | 00                           | 19;58               | 19;58               | ((((( ((( (.cucucucc)))))))))-.((( ((( ((( (.cucucucc)))))))))               | ((((( .....))))-.((( ((( .....)))))))))                  |
| 99           | -42.2             | -41.5             | 1.02             | 00                           | 00                           | 16.5;56             | 16.5;56             | ((-((( ((( (.cucucucc)))))))))-.((( ((( ((( (.cucucucc)))))))))              | ((-((( .....))))-.((( ((( .....)))))))))                 |
| 100          | -39.3             | -37.8             | 1.04             | 00                           | 00                           | 16;52               | 16;52               | ((((( ((( (.cucucucc)))))))))-.((( ((( ((( (.cucucucc)))))))))               | ((((( .....))))-.((( ((( .....)))))))))                  |
| 101          | -32.5             | -31.4             | 1.04             | 00                           | 00                           | 21;60.5             | 21;60.5             | ((((( ((( ((( (.cucucucc)))))))))-.((( ((( ((( (.cucucucc)))))))))           | ((((( ((( ((( .....)))))))))-.((( ((( ((( .....))))))))) |
| 102          | -32.5             | -31.4             | 1.04             | 00                           | 00                           | 21;60.5             | 21;60.5             | ((((( ((( ((( (.cucucucc)))))))))-.((( ((( ((( (.cucucucc)))))))))           | ((((( ((( ((( .....)))))))))-.((( ((( ((( .....))))))))) |
| 103          | -40.4             | -40.3             | 1.00             | 00                           | 00                           | 14.5;54.5           | 14.5;54.5           | ((((( ((( ((( (.cucucucc)))))))))-.((( ((( ((( ((( (.cucucucc)))))))))       | ((((( ((( ((( .....)))))))))-.((( ((( ((( .....))))))))) |
| 104          | -35.6             | -34.8             | 1.02             | 00                           | 00                           | 21;59.5             | 21;59.5             | ((-((( ((( (.cucucucc...)))))))))-.((( ((( ((( (.cucucucc...)))))))))        | ((-((( .....))))-.((( ((( .....)))))))))                 |
| 105          | -46.6             | -45.5             | 1.02             | 00                           | 00                           | 16.5;58.5           | 16.5;58.5           | ((((( ((( ((( (.cucucucc...)))))))))-.((( ((( ((( ((( (.cucucucc...))))))))) | ((((( ((( ((( .....)))))))))-.((( ((( ((( .....))))))))) |
| 106          | -56.4             | -55.8             | 1.01             | 000                          | 000                          | 20;58;97.5          | 20;58;97.5          | ((((( ((( ((( (.cucucucc)))))))))-.((( ((( ((( ((( (.cucucucc)))))))))       | ((((( ((( ((( .....)))))))))-.((( ((( ((( .....))))))))) |
| 107          | -52.9             | -52.3             | 1.01             | 000                          | 000                          | 17.5;54;95          | 17.5;54;95          | ((((( ((( ((( (.cucucucc)))))))))-.((( ((( ((( ((( (.cucucucc)))))))))       | ((((( ((( ((( .....)))))))))-.((( ((( ((( .....))))))))) |
| 108          | -54.2             | -53.2             | 1.02             | 000                          | 000                          | 18;54;97            | 18;54;97            | ((((( ((( ((( (.cucucucc)))))))))-.((( ((( ((( ((( (.cucucucc)))))))))       | ((((( ((( ((( .....)))))))))-.((( ((( ((( .....))))))))) |
| 109          | -49.8             | -49.5             | 1.01             | 000                          | 000                          | 19;57;97.5          | 19;57;97.5          | ((((( ((( ((( (.cucucucc...)))))))))-.((( ((( ((( ((( (.cucucucc...))))))))) | ((((( ((( ((( .....)))))))))-.((( ((( ((( .....))))))))) |
| 110          | -53.4             | -51.9             | 1.03             | 000                          | 000                          | 19;56;96.5          | 19;56;96.5          | ((-((( ((( (.cucucucc)))))))))-.((( ((( ((( ((( (.cucucucc)))))))))          | ((-((( .....))))-.((( ((( .....)))))))))                 |
| 111          | -57.0             | -55.8             | 1.02             | 000                          | 000                          | 20;58;97.5          | 20;58;97.5          | ((((( ((( ((( (.cucucucc)))))))))-.((( ((( ((( ((( (.cucucucc)))))))))       | ((((( ((( ((( .....)))))))))-.((( ((( ((( .....))))))))) |
| 112          | -51.3             | -50.9             | 1.01             | 000                          | 000                          | 16.5;52.5;93.5      | 16.5;52.5;93.5      | ((((( ((( ((( (.cucucucc)))))))))-.((( ((( ((( ((( (.cucucucc)))))))))       | ((((( ((( ((( .....)))))))))-.((( ((( ((( .....))))))))) |
| 113          | -58.3             | -57.1             | 1.02             | 000                          | 000                          | 21;59;100           | 21;59;100           | ((-((( ((( ((( (.cucucucc)))))))))-.((( ((( ((( ((( (.cucucucc)))))))))      | ((-((( .....))))-.((( ((( .....)))))))))                 |
| 114          | -58.0             | -57.0             | 1.02             | 000                          | 000                          | 19;56;98.5          | 19;56;98.5          | ((((( ((( ((( (.cucucucc)))))))))-.((( ((( ((( ((( (.cucucucc)))))))))       | ((((( ((( ((( .....)))))))))-.((( ((( ((( .....))))))))) |
| 115          | -50.7             | -50.1             | 1.01             | 000                          | 000                          | 19;53;95            | 19;53;95            | ((((( ((( ((( (.cucucucc)))))))))-.((( ((( ((( ((( (.cucucucc)))))))))       | ((((( ((( ((( .....)))))))))-.((( ((( ((( .....))))))))) |
| 116          | -43.5             | -43.1             | 1.01             | 000                          | 000                          | 14;47.5;84          | 14;47.5;84          | ((((( ((( ((( (.cucucucc)))))))))-.((( ((( ((( ((( (.cucucucc)))))))))       | ((((( .....))))-.((( ((( .....)))))))))                  |
| 117          | -50.7             | -50.1             | 1.01             | 000                          | 000                          | 19;53;95            | 19;53;95            | ((-((( ((( ((( (.cucucucc)))))))))-.((( ((( ((( ((( (.cucucucc)))))))))      | ((-((( .....))))-.((( ((( .....)))))))))                 |
| 118          | -43.5             | -43.1             | 1.01             | 000                          | 000                          | 14;47.5;84          | 14;47.5;84          | ((((( ((( ((( (.cucucucc)))))))))-.((( ((( ((( ((( (.cucucucc)))))))))       | ((((( .....))))-.((( ((( .....)))))))))                  |



| #<br>Cuckoo<br>RNA | Energy<br>cuckoo<br>TDM | MFE<br>(RNAfold<br>-d2) | Energy<br>TDM /<br>MFE | Abstract<br>shape<br>TDM<br>structure | Abstract<br>shape<br>MFE<br>structure | TDM hairpin centers | MFE hairpin centers | TDM structure and cuckoo motifs   | MFE structure                     |
|--------------------|-------------------------|-------------------------|------------------------|---------------------------------------|---------------------------------------|---------------------|---------------------|-----------------------------------|-----------------------------------|
| 159                | -61.5                   | -60.6                   | 1.01                   | □□□                                   | □□□                                   | 17.5;54.5;95.5      | 17.5;54.5;95.5      | (((((...(((...(((...)))...))))))) | (((((...(((...(((...)))...))))))) |
| 160                | -56.7                   | -57.6                   | 0.98                   | □□□                                   | □□□                                   | 18;56.5;95.5        | 20.5;56.5;95.5      | (((((...(((...(((...)))...))))))) | (((((...(((...(((...)))...))))))) |
| 161                | -57.6                   | -57.2                   | 1.01                   | □□□                                   | □□□                                   | 23.5;59.5;96.5      | 23.5;59.5;96.5      | (((((...(((...(((...)))...))))))) | (((((...(((...(((...)))...))))))) |
| 162                | -54.1                   | -53.5                   | 1.01                   | □□□                                   | □□□                                   | 19;57.5;96.5        | 19;57.5;96.5        | (((((...(((...(((...)))...))))))) | (((((...(((...(((...)))...))))))) |
| 163                | -54.4                   | -54.1                   | 1.01                   | □□□                                   | □□□                                   | 17.5;53.5;90.5      | 17.5;53.5;90.5      | (((((...(((...(((...)))...))))))) | (((((...(((...(((...)))...))))))) |
| 164                | -57.8                   | -56.9                   | 1.02                   | □□□                                   | □□□                                   | 17.5;54.5;96.5      | 17.5;54.5;96.5      | (((((...(((...(((...)))...))))))) | (((((...(((...(((...)))...))))))) |
| 165                | -61.0                   | -60.0                   | 1.02                   | □□□                                   | □□□                                   | 17.5;54.5;95.5      | 17.5;54.5;95.5      | (((((...(((...(((...)))...))))))) | (((((...(((...(((...)))...))))))) |
| 166                | -70.6                   | -69.4                   | 1.02                   | □□□                                   | □□□                                   | 17.5;54;95.5        | 17.5;54;95.5        | (((((...(((...(((...)))...))))))) | (((((...(((...(((...)))...))))))) |
| 167                | -54.4                   | -53.6                   | 1.01                   | □□□                                   | □□□                                   | 25;63.5;102.5       | 25;63.5;102.5       | (((((...(((...(((...)))...))))))) | (((((...(((...(((...)))...))))))) |
| 168                | -64.5                   | -72.3                   | 0.89                   | □□□                                   | □□□                                   | 22;72.5;113         | 22;72.5;113         | (((((...(((...(((...)))...))))))) | (((((...(((...(((...)))...))))))) |
| 169                | -45.8                   | -45.9                   | 1.00                   | □□□                                   | □□□                                   | 19;53.5;90          | 19;53.5;90          | (((((...(((...(((...)))...))))))) | (((((...(((...(((...)))...))))))) |
| 170                | -49.8                   | -49.2                   | 1.01                   | □□□                                   | □□□                                   | 23;58;100           | 23;58;100           | (((((...(((...(((...)))...))))))) | (((((...(((...(((...)))...))))))) |
| 171                | -53.4                   | -52.6                   | 1.02                   | □□□                                   | □□□                                   | 15.5;50;92.5        | 15.5;50;92.5        | (((((...(((...(((...)))...))))))) | (((((...(((...(((...)))...))))))) |
| 172                | -49.8                   | -53.4                   | 0.93                   | □□□                                   | □□□                                   | 20;59;99.5          | 20;59;99.5          | (((((...(((...(((...)))...))))))) | (((((...(((...(((...)))...))))))) |
| 173                | -55.4                   | -62.1                   | 0.89                   | □□□                                   | □□□                                   | 23;76.5;119.5       | 23;76.5;119.5       | (((((...(((...(((...)))...))))))) | (((((...(((...(((...)))...))))))) |
| 174                | -43.4                   | -45.2                   | 0.96                   | □□□                                   | □□□                                   | 25;76;118           | 25;74;118           | (((((...(((...(((...)))...))))))) | (((((...(((...(((...)))...))))))) |
| 175                | -47.0                   | -46.5                   | 1.01                   | □□□                                   | □□□                                   | 25;72;112           | 25;72;112           | (((((...(((...(((...)))...))))))) | (((((...(((...(((...)))...))))))) |
| 176                | -63.7                   | -63.8                   | 1.00                   | □□□                                   | □□□                                   | 17.5;54.5;96.5      | 17.5;54.5;96.5      | (((((...(((...(((...)))...))))))) | (((((...(((...(((...)))...))))))) |
| 177                | -53.0                   | -52.7                   | 1.01                   | □□□                                   | □□□                                   | 17;54;94.5          | 17;54;94.5          | (((((...(((...(((...)))...))))))) | (((((...(((...(((...)))...))))))) |
| 178                | -58.3                   | -64.0                   | 0.91                   | □□□                                   | □□□                                   | 18.5;55;94.5        | 18.5;55;94.5        | (((((...(((...(((...)))...))))))) | (((((...(((...(((...)))...))))))) |
| 179                | -46.0                   | -45.3                   | 1.02                   | □□□                                   | □□□                                   | 18;55;95.5          | 18;55;95.5          | (((((...(((...(((...)))...))))))) | (((((...(((...(((...)))...))))))) |
| 180                | -48.1                   | -53.5                   | 0.90                   | □□□                                   | □□□                                   | 16;52.5;91.5        | 16;52.5;91.5        | (((((...(((...(((...)))...))))))) | (((((...(((...(((...)))...))))))) |
| 181                | -55.3                   | -55.0                   | 1.01                   | □□□                                   | □□□                                   | 17;54;94.5          | 17;54;94.5          | (((((...(((...(((...)))...))))))) | (((((...(((...(((...)))...))))))) |
| 182                | -56.0                   | -61.9                   | 0.90                   | □□□                                   | □□□                                   | 18.5;55;94.5        | 18.5;55;94.5        | (((((...(((...(((...)))...))))))) | (((((...(((...(((...)))...))))))) |
| 183                | -48.2                   | -48.0                   | 1.00                   | □□□                                   | □□□                                   | 18.5;56;96.5        | 18.5;56;96.5        | (((((...(((...(((...)))...))))))) | (((((...(((...(((...)))...))))))) |
| 184                | -53.0                   | -52.7                   | 1.01                   | □□□                                   | □□□                                   | 17;54;94.5          | 17;54;94.5          | (((((...(((...(((...)))...))))))) | (((((...(((...(((...)))...))))))) |
| 185                | -56.5                   | -62.8                   | 0.90                   | □□□                                   | □□□                                   | 18.5;55;94.5        | 18.5;55;94.5        | (((((...(((...(((...)))...))))))) | (((((...(((...(((...)))...))))))) |
| 186                | -46.0                   | -45.3                   | 1.02                   | □□□                                   | □□□                                   | 18;55;95.5          | 18;55;95.5          | (((((...(((...(((...)))...))))))) | (((((...(((...(((...)))...))))))) |
| 187                | -48.9                   | -53.7                   | 0.91                   | □□□                                   | □□□                                   | 16;52.5;91.5        | 16;52.5;91.5        | (((((...(((...(((...)))...))))))) | (((((...(((...(((...)))...))))))) |
| 188                | -58.6                   | -59.9                   | 0.98                   | □□□                                   | □□□                                   | 18;55;94            | 18;55;94            | (((((...(((...(((...)))...))))))) | (((((...(((...(((...)))...))))))) |
| 189                | -49.6                   | -49.3                   | 1.01                   | □□□                                   | □□□                                   | 17;54;94.5          | 17;54;94.5          | (((((...(((...(((...)))...))))))) | (((((...(((...(((...)))...))))))) |
| 190                | -51.4                   | -57.3                   | 0.90                   | □□□                                   | □□□                                   | 18;54;93.5          | 18;54;93.5          | (((((...(((...(((...)))...))))))) | (((((...(((...(((...)))...))))))) |
| 191                | -46.3                   | -52.9                   | 0.88                   | □□□                                   | □□□                                   | 20.5;57;96.5        | 20.5;57;96.5        | (((((...(((...(((...)))...))))))) | (((((...(((...(((...)))...))))))) |
| 192                | -49.2                   | -57.0                   | 0.86                   | □□□                                   | □□□                                   | 18;54.5;93.5        | 18;54.5;93.5        | (((((...(((...(((...)))...))))))) | (((((...(((...(((...)))...))))))) |
| 193                | -55.3                   | -55.0                   | 1.01                   | □□□                                   | □□□                                   | 17;54;94.5          | 17;54;94.5          | (((((...(((...(((...)))...))))))) | (((((...(((...(((...)))...))))))) |
| 194                | -55.4                   | -61.3                   | 0.90                   | □□□                                   | □□□                                   | 18.5;56;95.5        | 18.5;56;95.5        | (((((...(((...(((...)))...))))))) | (((((...(((...(((...)))...))))))) |
| 195                | -43.8                   | -50.4                   | 0.87                   | □□□                                   | □□□                                   | 22.5;60;99.5        | 22.5;60;99.5        | (((((...(((...(((...)))...))))))) | (((((...(((...(((...)))...))))))) |
| 196                | -60.5                   | -60.1                   | 1.01                   | □□□                                   | □□□                                   | 17.5;53;92          | 17.5;53;92          | (((((...(((...(((...)))...))))))) | (((((...(((...(((...)))...))))))) |
| 197                | -51.5                   | -51.2                   | 1.01                   | □□□                                   | □□□                                   | 17;54;94.5          | 17;54;94.5          | (((((...(((...(((...)))...))))))) | (((((...(((...(((...)))...))))))) |
| 198                | -49.1                   | -55.0                   | 0.89                   | □□□                                   | □□□                                   | 18;54;93.5          | 18;54;93.5          | (((((...(((...(((...)))...))))))) | (((((...(((...(((...)))...))))))) |







| #<br>Cuckoo<br>RNA | Energy<br>cuckoo<br>TDM | MFE<br>(RNAfold<br>-d2) | Energy<br>TDM /<br>MFE | Abstract<br>shape<br>TDM<br>structure | Abstract<br>shape<br>MFE<br>structure | TDM hairpin centers  | MFE hairpin centers | TDM structure and cuckoo motifs | MFE structure                |
|--------------------|-------------------------|-------------------------|------------------------|---------------------------------------|---------------------------------------|----------------------|---------------------|---------------------------------|------------------------------|
| 319                | -64.4                   | -67.2                   | 0.96                   | □□□□                                  | □□□□                                  | 17.5;54.5;90.5;136.5 | 17.5;54.5;92;136.5  | ((((((((cuccuccc)))))...))))    | ((((((((cuccuccc)))))...)))) |
| 320                | -74.8                   | -79.2                   | 0.94                   | □□□□                                  | □□□□                                  | 15;55.5;101.5;146.5  | 15;55.5;103;146.5   | ((((((((accucccu)))))...))))    | ((((((((accucccu)))))...)))) |
| 321                | -74.3                   | -78.7                   | 0.94                   | □□□□                                  | □□□□                                  | 15;55.5;101.5;146.5  | 15;55.5;103;146.5   | ((((((((accucccu)))))...))))    | ((((((((accucccu)))))...)))) |



**Table S4.** Sequences of cuckoo RNAs.

| #<br>Cuckoo<br>RNA | Cuckoo RNA sequence                                                                     |
|--------------------|-----------------------------------------------------------------------------------------|
| 1                  | AUCGCCGGUGUUUCUCCUCCCAUUCUCCGCGCAUAAAAACCGGGACUCUCCUCCCCCAAGUCCGGU                      |
| 2                  | AUCGCCGGUGUUUCUCCUCCCAUUCUCCGCGCAUAAAAACCGGGACUCUCCUCCCCCAAGUCCGGU                      |
| 3                  | AUCGCCGGUGUUUCUCCUCCCAUUCUCCGCGCAUAAAAACCGGGACUCUCCUCCCCCAAGUCCGGU                      |
| 4                  | GGUGUUCGGUUUACUCCUCCCAAAAAUCGAAACUGAGCGCGGCACUCCUCCCAAGUGCAGCG                          |
| 5                  | GGUGUUCGGUUUACUCCUCCCAAAAAUCGAAACUGAGCGCGGCACUCCUCCCAAGUGCAGCG                          |
| 6                  | AUCGCCGGUGUUUCUCCUCCCAUUCUCCGCGCAUAAAAACCGGGACUCUCCUCCCCCAAGUCCGGU                      |
| 7                  | AUCGCCGGUGUUUCUCCUCCCAUUCUCCGCGCAUAAAAACCGGGACUCUCCUCCCCCAAGUCCGGU                      |
| 8                  | AUCGCCGGUGUUUCUCCUCCCAUUCUCCGCGCAUAAAAACCGGGACUCUCCUCCCCCAAGUCCGGU                      |
| 9                  | AUCGCCGGUGUUUCUCCUCCCAUUCUCCGCGCAUAAAAACCGGGACUCUCCUCCCCCAAGUCCGGU                      |
| 10                 | AUCGCCGGUGUUUCUCCUCCCAUUCUCCGCGCAUAAAAACCGGGACUCUCCUCCCCCAAGUCCGGU                      |
| 11                 | GGUGUUCGGUUUACUCCUCCCAAAAAACCGAAACUGAGCGCGGCACUCCUCCCAAGUGCAGCG                         |
| 12                 | AUCGCCGGUGUUUCUCCUCCCAUUCUCCGCGCAUAAAAACCGGGACUCUCCUCCCCCAAGUCCGGU                      |
| 13                 | GGUGUUCGGUUUACUCCUCCCAAAAAACCGAAACUGAGCGCGGCACUCCUCCCAAGUGCAGCG                         |
| 14                 | GGUGUUCGGUUUACUCCUCCCAAAAAACCGAAACUGAGCGCGGCACUCCUCCCAAGUGCAGCG                         |
| 15                 | AUCGCCGGUGUUUCUCCUCCCAUUCUCCGCGCAUAAAAACCGGGACUCUCCUCCCCCAAGUCCGGUCUUU                  |
| 16                 | AUCGCCGGUGUUUCUCCUCCCAUUCUCCGCGCAUAAAAACCGGGACUCUCCUCCCCCAAGUCCGGUCUUU                  |
| 17                 | AUCGCCGGUGUUUCUCCUCCCAUUCUCCGCGCAUAAAAACCGGGACUCUCCUCCCCCAAGUCCGGUCUUU                  |
| 18                 | AUCGCCGGUGUUUCUCCUCCCAUUCUCCGCGCAUAAAAACCGGGACUCUCCUCCCCCAAGUCCGGUCUUU                  |
| 19                 | AUCGCCGGUGUUUCUCCUCCCAUUCUCCGCGCAUAAAAACCGGGACUCUCCUCCCCCAAGUCCGGUCUUU                  |
| 20                 | AUCGCCGGUGUUUCUCCUCCCAUUCUCCGCGCAUAAAAACCGGGACUCUCCUCCCCCAAGUCCGGUCUUU                  |
| 21                 | GGGUGCGGUAUCUCCUCCCGAUCUCCUAAGAAAAGACCGGGUUCUCCUCCGGUCUUUUUU                            |
| 22                 | UCACCGUCCUUCUCCUCCGCGGUGACUCCAGCCAGCAGGGGUGUUUCUCCUCCGCCUUCGUCGGC                       |
| 23                 | CAGAAAGCCUUCUCCUCCGUGUUUCUUGUAUAUAGCGGCGGCUUUCUCCUCCUAGCGUCGCGC                         |
| 24                 | AUCGGGCCUUCUCCUCCAUUAGGCCGUGAUCAGCGAACCUCUCCUCCUUCGAGCGGUC                              |
| 25                 | CAGACCGCCUUCUCCUCCAUUCGGAUCGGAUCAACGGCAAGCUUCUCCUCCUUGGACGUGCGCC                        |
| 26                 | GGCCUUGCCUUCUCCUCCAUUGGGCGGGCAGAUUUCGGCGGUGAUGUUCUCCUCCAGAACUUGCACCGCC                  |
| 27                 | UCGGAUCUCCGCGCUUCCUCCGAAAAGGACAGUUCGAGACCCACCGCUUACUCCUCCAGGGACGGGUCAU                  |
| 28                 | UAAAGCGGCGCAUCACCUCCUCCGCGGUGCCCGCUUUAUGAAACAAGUUCGGAACCGCCACUCCUCCGCGGUGGAACCGAUGAU    |
| 29                 | UCGGAUCUCCGCGCUUCCUCCGAAAAGGACAGUUCGAGACCCCGCGCUUACUCCUCCGAGCCAGGGUCAUG                 |
| 30                 | UAAGGCGGCGGCCACCUCCUCCGCGGUGCCCGCUUUAUGACACAGGUUUCGGAACCGCCACUCCUCCGCGGUGGACCGAUUUU     |
| 31                 | UCAGGCGGUCUCCUCCUCCUCCGAGCGAUAACUCCGCGGCGAUCUCCUCCUCCUUGAUGCCCGCC                       |
| 32                 | UGUGAUCGGUUCUCCUCCUCCGAGCGGAUCCGGAUUAAGCGGCGAUCUCCUCCUCCUCCUUGGAGCGGUC                  |
| 33                 | UCGGAGCCUUCUCCUCCUCCGAAAGGCUUGACCGCGGUCGCUUCUCCUCCUCCUAGCGGUGCG                         |
| 34                 | AGAAGCGGCGGCUUCCUCCUCCGCGGUGGUCGCUUCCUCCGAAACAGAAUUCGAGGUGUUCUCCUCCUCCUUGAAGCGGCGAUGAGC |
| 35                 | AAGACGCGGCGGCGCUUCCUCCUCCGCGGUGGCAUCGUCGCGGCUUCGACCAUCAUGCAGGCGGCGUCCUCCUCCUUGGACCGGCGA |
| 36                 | AGACGCGCGGCGCUUCCUCCUCCUCCGCGGUGGCAUCAUGGAAAGUUCGCGGCGGUCUCCUCCUCCUUGAAGCGGUCUCCGAG     |
| 37                 | GGCCUUCUCCUCCUCCAGAGGUGGCGCACAUUAGAAAGUACGAGACCUUCCUCCGCGGUCGUCGCUUUU                   |
| 38                 | AGAAAUAAGUAACGCGCUUUCUCCUCCGAAAGGCUUUCUUAAGGGGUGGUGUUCUCCGACAGCAGCCCUU                  |
| 39                 | GAAAAUAGUAACGCGCUUUCUCCUCCGAAAGCGCGAGUCUUUCAAAGGGGUGGUGUUCUCCGACAGCAGCCCUU              |
| 40                 | GAAACGGGCUUUCUCCUCCGAAAGGUGUUCGGAUCGUGCCACCCUCCUCCUCCUUGGGUUCGAGCAC                     |
| 41                 | UUUCGAAACCGCCACCUCUCCCGGUGGAAACGAAAUAACCGCUGACGGCGCUUCCUCCCGGACAAUGUUGGCG               |
| 42                 | GAUACGGUAGAGCCUCCUCCUCCGCGGUCUCCCGUUCAGCGCGCACCUCCUCCUCCUUGAGGGUGCGCC                   |
| 43                 | GCGAGACCCUCCUCCUCCGUGGUCUGCGGUUCGCGGCGGCGGCUUCCUCCUCCUCCGAGGCGGCGCCAAACC                |
| 44                 | GCGAAGUCUGUUCUCCUCCUCCAGGCUUCGCGUUCGAGCGGCUUCCUCCUCCUCCUUGGGUGUUGCGCC                   |
| 45                 | GAAACCCGACCCUCCUCCUCCUUGGUGCAGGGUGUUCAGCGGCAUCUCCUCCUCCUCCUUGAGGUGCGCC                  |
| 46                 | GAAACGUCGUGCAUCCUCCCGACCUCAUUCAGAAUGCCGCGGUGCAUCCUCCUCCUCCCGGCGGCGGCA                   |

#  
Cuckoo  
RNA

Cuckoo RNA sequence

---

47 ACACCCUGCCUUCUCCUCCUUCUGGCCGGUGUUGUACAGAACGGCGGUGCCUCCUCCUCCUGGCACCGCCGUUUUUUGUG  
48 GAGUUCAGGCUCUCUUCUCCUCCUUCAGGGCCUGUAAUCGCGGUGACAUCCUCCUCCUCCUGAUGUACCCGC  
49 ACACCUUGCCUUCUCCUCCUUCUGGCCGGUGUUGUACAGAACGGCGGUGCCUCCUCCUCCUGGCACCGCCGUUUUUUGUGC  
50 GAGUUCAGGCUCUCUUCUCCUCCUUCAGGGCCUGUAAUCGCGGUGACAUCCUCCUCCUCCUGAUGUACCCGC  
51 GACGGGCGACUCUCUCCUCCUAGGCUUCGUGUACAUAGCCGGCGCAUCUCCUCCUCCUCCCGGCGGCUUC  
52 UCUGAAAGCCCGUCCUCCUCCUCCCGGACCGGCCUUAUGGAAUGCAGUAGAGCCCGCUCCAGCAGCUCUCCUCCUCCUGAGCUCGCGGGCAUUG  
53 GACUUCGAGACCCUCCUCCUCCUCCUGGGUUCGGAUUCGGCGCAUCCUCCUCCUCCUCCUGAGGAUGCCGCC  
54 AUAAGCCCUCCUCCUCCUCCUGGGGUUCGUAAGAAGACGGCGGCUCCUCCUCCUCCAGAGCCGCCGCUUC  
55 CUGCCGCCUCCUCCUCCUGGGGGGUGUGGUGUCCACCUCCUCCCGGGCGGACCG  
56 AACCCGAGGCCUCCUCCUCCUCCUGGGCGGAGGUUAUCGCGGGGCGUCUCCUCCUCCUCCUGAGCGCCGCCG  
57 GGACUUCGGCACUGCACCUCCUCCCGGGUGCCGAUGACCAAGCGGGCGUCUCCUCCUCCUGAGCCGCCGC  
58 GGACUUCGGCACUGCACCUCCUCCCGGGUGCCGAUGACCAAGCGGGCGUCUCCUCCUCCUGGAGCCGCCGC  
59 GGACUUCGGCACUGCACCUCCUCCCGGGUGCCGAUGACCAAGCGGGCGUCUCCUCCUCCUGGAGCCGCCGC  
60 GGACUUCGGCACUGCACCUCCUCCCGGGUGCCGAUGACCAAGCGGGCGUCUCCUCCUCCUGGAGCCGCCGC  
61 UGGACUUCGGCACUGCACCUCCUCCCGGGUGCCGAUGACCAAGCGGGCGUCUCCUCCUCCUGGAGCCGUCG  
62 UUCGAAAGCCGUCUCCUCCUCCUGGCAGUCCGAAACCGCAGCGGCCUCCUCCUCCUGGGGUGCGUUC  
63 CUGCGAGGUCCACCUCCUCCCGGGACCUUAAGCAGCAGCGGCGACGCCUCCUCCUCCUCCUGGUGUCGCGU  
64 GGGCUCGCGCUGCACCUCCUCCCGGGCGGCAUGACCAAGCGGGCGUCUCCUCCUCCUGGAGCCGCCGC  
65 GGGCUCGCGCUGCACCUCCUCCCGGGUGCCGAUGACCAAGCGGGCGUCUCCUCCUCCUGGAGCCGCCGC  
66 GUUCGAAAGCCCUCCUCCUCCUGGGCGGACUCCGCAACCGCAGCGGCCUCCUCCUCCUGGGGUGCGUUC  
67 CUGCGAGGUCCACCUCCUCCCGGGACCUUAAGCAGCAGCGGCGACGCCUCCUCCUCCUCCUGGUGUCGCGU  
68 GGACUUCGGCACUGCACCUCCUCCCGGGCGGCAUGACCAAGCGGGCGUCUCCUCCUCCUGGAGCCGCCGC  
69 GGACUUCGGCACUGCACCUCCUCCCGGGUGCCGAUGACCAAGCGGGCGUCUCCUCCUCCUGGAGCCGUCG  
70 GGACUUCGGCACUGCACCUCCUCCCGGGUGCCGAUGACCAAGCGGGCGUCUCCUCCUCCUGGAGCCGUCG  
71 GGACUUCGGCACUGCACCUCCUCCCGGGUGCCGAUGACCAAGCGGGCGUCUCCUCCUCCUGGAGCCGCCGC  
72 GGACUUCGGCACUGCACCUCCUCCCGGGUGCCGAUGACCAAGCGGGCGUCUCCUCCUCCUGGAGCCGCCGC  
73 GGACUUCGGCACUGCACCUCCUCCCGGGUGCCGAUGACCAAGCGGGCGUCUCCUCCUCCUGGAGCCGCCGC  
74 UGGACUUCGGCACUGCACCUCCUCCCGGGUGCCGAUGACCAAGCGGGCGUCUCCUCCUCCUGGAGCCGCCGC  
75 UUCGAAAGCCGUCUCCUCCUCCUGGCAGUCCGAAACCGCAGCGGCCUCCUCCUCCUGGGGUGCGUUC  
76 CUGCGAGGUCCACCUCCUCCCGGGGCUUAAGCAGCAGCGGCGACGCCUCCUCCUCCUCCUGGUGUCGCGU  
77 GGACUUCGGCACUGCACCUCCUCCCGGGUGCCGAUGACCAAGCGGGCGUCUCCUCCUCCUCCUGGAGCCGCCGC  
78 GGACUUCGGCACUGCACCUCCUCCCGGAGUGCCGAUGACCAAGCGGGCGUCUCCUCCUCCUGGAGCCGCCGC  
79 GGACUUCGGUACUGCACCUCCUCCCGGGUGCCGAUGACCAAGCGGGCGUCUCCUCCUCCUGGAGCCGCCGC  
80 GGACUUCGGCACUGCACCUCCUCCCGGGUGCCGAUGACCAAGCGGGCGUCUCCUCCUCCUCCUGGAGCCGUCG  
81 UGGACUUCGGCACUGCACCUCCUCCCGGGUGCCGAUGACCAAGCGGGCGUCUCCUCCUCCUGGAGCCGCCGC  
82 UUCGAAAGCCGUCUCCUCCUCCUGGCAGUCCGAAACCGCAGCGGCCUCCUCCUCCUGGGGUGCGUUC  
83 CUGCGAGGUCCACCUCCUCCCGGGACCUUAAGCAGCAGCGGCGACGCCUCCUCCUCCUCCUGGUGUCGCGU  
84 CUGAGGUUCGGGCAUCCUCCUCCUCCUGGAGAGAGCGCCGCAUGUUGGGGGGCAUUAUCCUCCUCCAGAUUCGCGC  
85 GGAUCAGGUCAACCCUCCUCCUCCUGGUGAUCUUAUACCAAGGGGUGGGCGCUAUCUCCUCCAGGCGCAACCGUC  
86 CUGAGGUUCGGGCUUAUUCUCCUCCUGAGAGCGCCGCAUGUUGGGGGGCAUUAUCCUCCUCCAGAUUCGCGC  
87 CAGAUCAUCCUCCUCCUCCUGGGUUGUUAACAAAGGCGGUGGCGCUAUCUCCUCCCGGGGCGCACCGUC  
88 GUUUAGAUGCCTGUUUCUCCUCCUUAAGGGGCAUACAUACCAGGAGCUCAGUGGUUUCUCCUCCUUAAGCCACUUGCCACUCCGG  
89 CCGGACGGUCUCUCCUCCUCCUCCUUAUAGCAGGGGUCGCGGAAACGGUUCGUAUGGCGUGCAUCCUCCUCCUGCCCGCAUAAAGGACCG  
90 GCGAAUGCCUCCUCCUCCUCCUGGGGACGUAUAGGAAACGGCGGACCUCCUCCUCCUCCUGGUGCGCGGCUUUUUUAU  
91 CAGAUACCCCUCCUCCUCCUCCUGGGUUAUCUUAACGGUACAGGGCAUUCUCCUCCUCCUGAUGCCUGGGGCCGU  
92 ACUUCGGGCGUCUCCUCCUCCUGGAGUUGCAUAGAACGGCGGUGCCUCCUCCUCCUGGGCGCGCGUUC  
93 CGCGGAUACACCGGUCUCUCCUCCUCCUGCCGGUGUAGAAGCGCGCGGGUGUCUCUCCUCCUCCUGCACCGCCCGC  
94 GGAAUCAGGCCUUCUCCUCCUCCUGGGGCUUAGACUACGCGGCGCAUCCUCCUCCUCCUGAUGCCGCCGC  
95 GAUCAGGCCUUCUCCUCCUCCUUAAGGGGUCUCCUUAAGGGGUGCAUCCUCCUCCUCCUGAUGCCACCGC





#  
Cuckoo  
RNA

Cuckoo RNA sequence

```
194 UCGCAGCCGCGCACUCCUCCUCCCAAGCGCGUCGCAUAAGACUGGCAACACUCCUCCUCCAGUUGCCAGUCAUAUAGCGCCGCCGGAUCCUCCCCGCGGGCGUUUUUAU
195 CCUAUCGAAACGGCUUUCUCCUCCUCCAUAGCGGUUCGACAGGGUGGCAACACUCCUCCUCCAGUUGUCGAGUCAGUUUAUAGCCCGACGGAUCCUCCCCGUCGGGCUU
196 GGACCGAAGCGCUUCCCCUCCUAGCCGCUUCGUGCCGACGACAGCACUUCUCCUCCAGCUGUCGGUCACUUCGAAAGCCCGCGCAUUCUCCCGCGCCGGGCUU
197 GUAAAGCAGCGCACUCCUCCUCCAGCGCUUACAUUCGACUGACAACACUCCUCCUCCAGUUGUCAGUCAGGAUCAAGAGCCCGCGCACCUCCUCCCGGUCGGGCUUUUUUUUU
198 UCGUAGCCGCGCACUCCUCCUCCAGCGGCUUCGCAUAGACUGGCAACACUCCUCCUCCAGUUGUCAGUCACCAUAAACGCGCCCGCGGAUCCUCCCCGCGGGGCGU
199 CUCAUCGACACGGCUUCUCCUCCUCCUAGCCGCUUCGUAAGGGUCGACAACACUCCUCCUCCAGUUGUCGAGUCAGUUUAUAGCCCGACGGAUUCUCCUCCCCGUCGGGCUU
200 GAAGGUAGCGCACUCCUCCUCCUCCUCCGCGCUUCAUAGAUUGGCAACACUCCUCCUCCUCCAGUUGCCAAUCCGGAUCAAGAGCCCGAUGCAUCCUCCUCCCGGUCGGGCUU
201 UCGGAGCGCAUACUCCUCCUCCAAUUGCGUCGGAUCGUAUGGCGAGCUCUCCUCCUCCAGUUGCAUACACCAAUAGCGCCACCGCAUCCUCCUCCCGGUGGGGCUUUUU
202 CAUAAUACUCGAGAGCGGCUUCCUCCUCCAAUUGCCGUCGGAUUGGAUCAGCAACUCCUCCUCCAGUUGUCGAGUCAGGUCAAAGCCCGACGCAUCCUCCCGGUCGGGCUUU
203 UAUGCCUGACCCUUCUCCUCCUCCUCCGCGGCUUCGAGCAUAGCGGCGGCAACUCCUCCUCCUCCUUGGUCGCGCGCACUCCAUUUCGGAUCGAGGCCCCUCCUCCUCCUGGGGCGUCUAUAC
204 CGGUCGCGAGCGCACUCCUCCUCCAGCGUCUCCGUAUCGGAUUGGCAACACUCCUCCUCCAGUUGCCAAUAGAGAACGGCAACGCCCGCGGGAUCCUCCCCAGCGGGCGUUUU
205 UCGAAACAGCGUACUCCUCCUCCAGCGCUGUUCGUAAGGUUGGCAACACUCCUCCUCCGCUUGCCAAUUCUAUUCAGACGCCCGCGGAUCCUCCCCAGCGGGCGUCGU
206 CAUCGAAGCGCUGCACCUCCUCCCGCGGCGCCGUAUGCGGGUCGGUUCACUCCUCCUCCAGGAACCGGCCGAGUUUAAGAGCCCGACGCCACCUCCUCCCGGUCGGGCUUU
207 UCGAUGGAGCACUCCGCGUCCAGCUCUGUCGAGGGGAUCGGCAACCCUCCUCCUCCAGUUGCCGUAUCAGGAUCAGGAUCGAAAGCCCGCGCACCUCCUCCCGCGCGGGCUU
208 ACCGAGGCGAUUUACCUCCUCCCGAGUCGUAUGCGGUCGACGGACAGCACUCCUCCUCCAGCUGUCAGUCACUUUUAAGAGCCCGCGCACCUCCUCCCGCGCGGGC
209 ACCGAGGCGAUUUACCUCCUCCCGAGUCGUAUGCGGUCGACGGACAGCACUCCUCCUCCAAAGCUGUCAGUCACUUUUAAGAGCCCGCGCACCUCCUCCCGCGCGGGC
210 UCGAGGAAGCACUCCUCCUCCAGCUUCAUCGAGGGGAUCGGCGACCCUCCUCCUCCAGUUGCCGUAUCAGGAUCGAAAGCCCGCGCACUCCUCCCGCGCGGGCUU
211 CGGUCGCGAGCGCACUCCUCCUCCAGCGUCUCCGUAUCGGAUUGGCGACAACUCCUCCUCCGCUUGCCAAUCAGAACAGGCAACGCCCGCGGACCUCCUCCCCAGUGGGGCUUUUU
212 UCGAAACAGCGCACUCCUCCUCCAGCGCUGUUCGUAAGGUUGGCAACACUCCUCCUCCGCUUGCCAAUUCUAUUCAGACGCCCGCGGAUCCUCCUCCGCGGGCGUCGU
213 CAUCGAAGCGCUGCACCUCCUCCCGCGGCGCCGUAUGCGGGUCGGUUCACUCCUCCUCCAGGAACCGGCCAAGUUUAAGAGCCCGACGCCACCUCCUCCCGGUCGGGCUUU
214 UCGGUAAGAGCACUCCUCCUCCGGGCUUCAUCGAGGGGAUCGGCAACCCUCCUCCUCCAGUUGCCGUAUCAGGAUCGAAAGCCCGCGCACCUCCUCCCGCGCGGGCUU
215 CGGUCGCGAGCGCACUCCUCCUCCCGCGCUCUCCGUAUCGGAUUGGCGACACUCCUCCUCCAGUUGCCAAUCAGAACAGGCAACGCCCGCGGGAUCCUCCCCAGCGGGCGU
216 UCGAAACAGCACAUUCCUCCUCCUCCAGCUGUUCGUAAGCAUUGGCAACACUCCUCCUCCGCUUGCCAAUCACCUUAUAGAGCGCCCGCGGACCUCCUCCCCGCGGGGCUU
217 UCGAAGUCAGCACUCCUCCUCCCGUCGCGACGACUCGUAUCGCUUCACUCCUCCUCCAGCUCUCCUCCUCCAGGACCGGAUUGGUUUUAAGAGCCCGCGCACCUCCUCCCGGUCGGGCUU
218 CAUCGAAGCGCUGCACCUCCUCCCGCGGCGCCGUAUCGGGAUCGGUUCACUCCUCCUCCAGGAACCGGCCGAGUUUAAGAGCCCGACGCCACCUCCUCCCGGUCGGGCUUU
219 ACCGAGGCGAUUUACCUCCUCCCGAGUCGUAUGCGGUCGACGGACAGCACUCCUCCUCCAAAGCUGUCAGUCACUUUUAAGAGCCCGCGCACCUCCUCCCGCGCGGGC
220 UUGUCGAUGGAACACUCCUCCUCCAGUUCGCGGGAUCGGCAACCCUCCUCCUCCGCUUGCCGUAUCAGGAUCGGAAGCCCGCGCACCUCCUCCCGCGCGGGCUU
221 CGAUCGGGAGCGCACUCCUCCUCCAGCGCACCGGUAUCGGAUUGGCAACACUCCUCCUCCAGUUGCCAAUCAGAACAGCGACGCCUCGUGGACCUCCUCCCCAGCGGGGCUUUUU
222 UCGAAGCAGCGCACUCCUCCUCCAGCGCGCUUUGUAAGGAUUGGCAACACUCCUCCUCCGCUUGCCAAUCGCCUUAUUGAGCGCCCGCGGUCUCCUCCCGCGGGGCUU
223 UGUCGAAGCGCUGUACCUCCUCCAGCGCGCCCGGAUUCGUAUCGGUUCACUCCUCCUCCAGAACCGAUCAAGUUUAAGAGCCCGAGCCACCUCCUCCCGGUCGGGCUUU
224 UGUCGAAGCGCUGUACCUCCUCCAGCGCGCAAGAGCGCGGAUCGGUUCACUCCUCCUCCAGGACCGAUCAAGUUCAGAGACCCCGAUGCAUCCUCCCGCAUCGGGCUUU
225 UGUCGAAGCGCUGUACCUCCUCCAGCGCGCCCGGAUUCGGUCGGUUCACUCCUCCUCCAGAACCGAUCAAGUUUAAGAGCCCGAGCCACCUCCUCCCGGUCGGGCUUU
226 CGAUCGGGAGCGCACUCCUCCUCCAGCGCGCCCGAUACGGAUUGGCGACACUCCUCCUCCGCUUGCCAAUCAGAUCAAGCAACGCCCGCGGACCUCCUCCCCAGCGGGGCUUUUU
227 UCGAAGCAGCGCACUCCUCCUCCUCCAGCGCUGUUCGUAUGGAUUGGCAACACUCCUCCUCCGCUUGCCAAUCGCUUUAUAGAGCGCCCGCGGUCUCCUCCCGAGCGGGGCUU
228 CUGUCGAUGGAACACUCCUCCUCCAGUUCUCCUCCGCGGAUCGGCAACCCUCCUCCUCCAGUUGCCGCUUCAGGAUCGAAAGCCCGCGCACCUCCUCCCGCGCGGGUUUUCU
229 UGUCGAAGCGCUGUACCUCCUCCAGCGCGCAAGAGCGCGGAUCGGUUCACUCCUCCUCCAGGACCGAUCAAGUUCAGAGACCCCGAUGCAUCCUCCCGCAUCGGGCUUU
230 UGUCGAAGCGCUGUACCUCCUCCAGCGCGCCCGGAUUCGGUCGGUUCACUCCUCCUCCAGAACCGAUCAAGUUUAAGAGCCCGAGCCACCUCCUCCCGGUCGGGCUUU
231 CGAUCGGGAGCGCACUCCUCCUCCAGCGCGCCCGAUUCGGAUUGGCGACACUCCUCCUCCGCUUGCCAAUCAGAUCAAGCAACGCCCGCGGACCUCCUCCCCAGCGGGGCUUUUU
232 UCGAAGCAGCGCACUCCUCCUCCUCCAGCGCUGUUCGUAUGGAUUGGCAACACUCCUCCUCCGCUUGCCAAUCGCUUUAUAGAGCGCCCGCGGUCUCCUCCCCAGCGGGGCUU
233 CUGUCGAUGGAACACUCCUCCUCCAGUUCUCCUCCGCGGAUCGGCAACCCUCCUCCUCCAGUUGCCGCUUCAGGAUCGAAAGCCCGCGCACCUCCUCCCGCGCGGGUUUUCU
234 CGAUCGGGAGCGCACUCCUCCUCCAGCGCGCCGUAUCGGAUUGGCGACACUCCUCCUCCGCUUGCCAAUCAGAUCAAAACAGCCCGCGGACCUCCUCCCCAGCGGGGCUUUUU
235 UCGAAGCAGCGCACUCCUCCUCCUCCAGCGCUCGUAUGGAUUGGCAACACUCCUCCUCCGCUUGCCAAUCGCCUUAUAGAGCGCCCGCGGUCUCCUCCCCAGCGGGGCUU
236 UGUCGAAGCGCUGUACCUCCUCCAGCGCGCCCGGAUUCGGUCGGUUCACUCCUCCUCCAGAACCGAUCAAGUUUAAGAGCCCGAGCCACCUCCUCCCGGUCGGGCUUU
237 CUGUCGAUGGAACACUCCUCCUCCAGUUCUCCUCCGCGGAUCGGCAACCCUCCUCCUCCAGGACCGAUCAAGUUCAGAGACCCCGAUGCAUCCUCCCGCAUCGGGCUUUUCG
238 UGUCGAAGCGCUGUACCUCCUCCAGCGCGCAAGAGCGCGGAUCGGUUCACUCCUCCUCCAGGACCGAUCAAGUUCAGAGACCCCGAUGCAUCCUCCCGCAUCGGGCUUUUCG
239 CGAUCGGGAGCGCACUCCUCCUCCAGCGCGCCGUAUCGGAUUGGCGACACUCCUCCUCCGCUUGCCAAUCAGAUCAAGCAACGCCCGCGGACCUCCUCCCCAGCGGGGCUUU
240 UCGAAGCAGCGCACUCCUCCUCCUCCAGCGCGCCGGAUUCGGUCGGUUCACUCCUCCUCCAGAACCGAUCAAGUUUAAGAGCCCGAGCCACCUCCUCCCGGUCGGGCUUU
241 UGUCGAAGCGCUGUACCUCCUCCAGCGCGCCCGGAUUCGGUCGGUUCACUCCUCCUCCAGAACCGAUCAAGUUUAAGAGCCCGAGCCACCUCCUCCCGGUCGGGCUUU
242 CUGUCGAUGGAACACUCCUCCUCCAGUUCUCCUCCGCGGAUCGGCAACCCUCCUCCUCCAGUUGCCGCUUCAGGAUCGAAAGCCCGCGCACCUCCUCCCGCGCGGGUUUUCU
```



#  
Cuckoo  
RNA

Cuckoo RNA sequence

---

292 ACCCGCCCGCUCUCCUCCUUGGGGCGGGUUCAGGCGACAUCCUCCUCCUCCUAGGAGUUCGCGCCACCAACACGGAAGCCUCCUCCUCCUUGGGUUCUGUUAAGGCGGCGACCCUCCUCCUCCUUGGGUUCGCCGACU  
293 UACGAUGGCCUCCUCCUCCUUGGGGUCGUCUGAGCGGUAUUGGCACUCCUCCUCCAGCAUUGCGCACCUUUAACGCGGCCUCCUCCUCCUUGGGCCAGCGUUGCGGGCGGUGCCUCCUCCUCCUUGGGACCGCCGC  
294 UGCGACGGUCCUCCUCCUCCUUGGGUUCGUCAGCACGGGUAUUGGCGUCCUCCUCCUCCUCCUUGCCGACCCCAUACGCGGCCUCCUCCUCCUUGGGCCAGCGUUGCGGGCGGUGCCUCCUCCUCCUUGGGACCGCCGC  
295 CGCGUUCACGGGGCUCUCCUCCUCCAAAGCCUUGAGCGUGCAACGCCGGGACCUCCUCCUCCAAUCCCGCAGUCUCCAACGACGCCAGUACCAACGCGGCCUCCUCCUCCUUGGGCGGGGCGCCCG  
296 AGGCGCGUAGGAAUCUCCCAAUCAAACUCGCGAGCCUAAAUCAAAUCCUCAAAGUGGCACUCCUCCCAAGCGCUGUAGUUGUUUCAAACAGAGAUUUCUCCCAAGUUCUGUUAUACUAGCUUCCGCGUCUCCUCCAUAGCGGGCGUUAAGCUG  
297 UCGAAGCGAUGCUUCCUCCCGCAACGCUUCGAAGUUUAGACGGCCACUCCUCCUCCAAAGGGACGUCUGUGGGAACAGCGGCACUCCUCCAGGUCGCGGUUCGUGUUUAGGAAAGCCUGCCGACCCUCCUCCCGGGCAGGCUUUUUA  
298 AUCGAAGCGAUGCACCUCUCCCGCAUCCUUGAUUUGCAGGCGCUCAUCCUCCUCCAGGGACGUCUGCGGGAACAGCCGACUCCUCCUCCAGCUGUUGUUCGUAUUCGAAAGCCUGCGCACUCCUCCCGGGCAGGCUUUU  
299 CUCGAAGCGAUGCUUCCUCCCGCACCGCUUCGAGUUAAGAUUGGCCCACUCCUCCUCCGAAAGGACGUCUGUUGGAAACAGCGGCACUCCUCCUCCAAAGUCGUGUUCGGUUCUUUAGGAAAGCCUGCCGACCCUCCUCCCGGGCAGGCUUUUUA  
300 UCGAAGCGAUGCUUCCUCCCGCAACGCUUCGAAGUUUAGACGGCCACUCCUCCUCCAAAGGGACGUCUGUGGGAACAGCGGCACUCCUCCAGGUCGCGGUUCGUGUUUAGGAAAGCCUGCCGACCCUCCUCCCGGGCAGGCUUUUUA  
301 AUCGAAGCGAUGCACCUCUCCCGCAUCCUUGAUUUGCAGGCGCCUCCUCCUCCAGGGUCGCUUGCGGGAACAACAGCACUCCUCCUCCAGCUGUUGUUCGUAUUCGAAAGCCUGCGCACUCCUCCCGGGCAGGCUUUU  
302 AUCGAAGCGAUGCACCUCUCCCGCAUCCUUGAUUUGCAGGCGCUCAUCCUCCUCCAGGGACGUCUGCGGGAACAGCGGCACUCCUCCUCCAGCUGUUGUUCGUAUUCGAAAGCCUGCGCACUCCUCCCGGGCAGGCUUUU  
303 GGCUCAACGAAGCAAUGCACCUCUCCCGCAGAGCUUCGUGGUUUCAGGCGACCCACUCCUCCUCCAAAGGGGAGCUCGACGGAACAGCGGCACUCCUCCUCCAGCGUUGUCAAUUUUAGGAAAGCCUGCCGACCCUCCUCCCGGGCAGGCUUUUUA  
304 CGAAGCAAUGCACCUCUCCCGCAAGCUUCGCUUUCAGCCGACCCUCCUCCUCCAAAGGGGAGCUCGUAUAAACAGCGGCACUCCUCCUCCAGCUGCGUUCGUAUUCAGAAAGCCUGCCGACCCUCCUCCCGGGCAGGCUUUUUA  
305 ACGAAGCAAUGCACCUCUCCCGCAGAGCUUCGUGUCACAGGCGACCAUCCUCCUCCCGGGGGCGCCUGACGGAACAGCGGCGCUCCUCCUCCAGCGGUUGUUAUUAUUGGAAAGCCUGCCGACCCUCCUCCCGGGCAGGCUUUUUA  
306 UACGAAGCGAUGCACCUCUCCCGCAUCCUUGAUUUCAGGCGCCCAUCCUCCUCCAGGGUCGUCUGUGGAUUCAGCACUCCUCCUCCAGCUGUUGUUCGUAUUCGAAAGCCUGCCGACCCUCCUCCCGGGCAGGCUUUUUA  
307 UACGAAGCGAUGCACCUCUCCCGCAUCCUUGAUUUCAGGCGCCCAUCCUCCUCCAGGGUCGUCUGUGGAUUCAGCACUCCUCCUCCAGCUGUUGUUCGUAUUCGAAAGCCUGCCGACCCUCCUCCCGGGCAGGCUUUUUA  
308 CGAAGUAGUAGCACCUCUCCCGCAAGCUUCGUGUUUAGGCGACCCGCUCCUCCUCCAAAGGGCGCCUUCAGGAACAGCGGCACUCCUCCUCCAGCGGUUGUUAUUAUUCGAAAGCCUGCCGACCCUCCUCCCGGGCAGGCUUUUUA  
309 UACGAAGCGAUGCACCUCUCCCGCAUCCUUGAUUUCAGGCGCCCAUCCUCCUCCAGGGUCGUCUGUGGAUUCAGCACUCCUCCUCCAGCUGUUGUUCGUAUUCGAAAGCCUGCCGACCCUCCUCCCGGGCAGGCUUUUUA  
310 CGAAGCGAUGAUCUCCUCCCGCAUCCUUCGCUUGGCGAGAGCUCUUAUCCUCCUCCAGGGGACGUCGAGGAUAGCGGAACUCCUCCUCCUCCAGCUGUUGGUAUUAUUAUUCGAAAGCCUGCCGACCCUCCUCCCGGGCAGGCUUUUUA  
311 AUCGAAGCGAUGCACCUCUCCCGCAGAGCUUCGAUUGUGGGGACCUUCCUCCUCCCGGGUUCUUCGCUACAGAGAUUCAGCGCCACUCCUCCUCCCGGGGUCGUAUCGUAUUCGAAAGCCUGCCGACCCUCCUCCCGGGCAGGCUUUUUA  
312 UCAACGAAGCGAUGCACCUCUCCCGCAGAGCUUCGUGAUUCAGGCGGCCACUCCUCCUCCAGGGACGUCUGAAGGACAGCGGCACUCCUCCUCCUUGCGUAUCGUAUUCGAAAGCCUGCCGACCCUCCUCCCGGGCAGGCUUUUUA  
313 AUCGAAGCGAUGCACCUCUCCCGCAGAGCUUCGAUUGCGAGCGACCUUCCUCCUCCGAGUUCGCUUGCGGGAUACAGCGCUACUCCUCCUCCGAAUGCUGAUCGUAUUCGAAAGCCUGCCGACCCUCCUCCCGGGCAGGCUUUUUA  
314 AUCGAAGCGAUGCACCUCUCCCGCAGAGCUUCGAUUGCGAGCGACCUUCCUCCUCCGAGUUCGCUUGCGGGAUACAGCGCUACUCCUCCUCCGAAUGCUGAUCGUAUUCGAAAGCCUGCCGACCCUCCUCCCGGGCAGGCUUUUUA  
315 AUCGAAGCGAUGCACCUCUCCCGCAGAGCUUCGAUUGCGAGCGACCUUCCUCCUCCGAGUUCGCUUGCGGGAUACAGCGCUACUCCUCCUCCGAAUGCUGAUCGUAUUCGAAAGCCUGCCGACCCUCCUCCCGGGCAGGCUUUUUA  
316 AUCGAAGCGAUGCACCUCUCCCGCAGAGCUUCGAUUGCGAGCGACCUUCCUCCUCCGAGUUCGCUUGCGGGAUACAGCGCUACUCCUCCUCCGAAUGCUGAUCGUAUUCGAAAGCCUGCCGACCCUCCUCCCGGGCAGGCUUUUUA  
317 AUCGAAGCGAUGCACCUCUCCCGCAGAGCUUCGAUUGCGAGCGACCUUCCUCCUCCGAGUUCGCUUGCGGGAUACAGCGCUACUCCUCCUCCGAAUGCUGAUCGUAUUCGAAAGCCUGCCGACCCUCCUCCCGGGCAGGCUUUUUA  
318 AUCGAAGCGAUGCACCUCUCCCGCAGAGCUUCGAUUGCGAGCGACCUUCCUCCUCCGAGUUCGCUUGCGGGAUACAGCGCUACUCCUCCUCCGAAUGCUGAUCGUAUUCGAAAGCCUGCCGACCCUCCUCCCGGGGAGGCUUUUUA  
319 AUCGAAGCGAUGCACCUCUCCCGCAGAGCUUCGAUUGCGAGCGACCUUCCUCCUCCGAGUUCGCUUGCGGGAUACAGCGCUACUCCUCCUCCGAAUGCUGAUCGUAUUCGAAAGCCUGCCGACCCUCCUCCCGGGUAGGCUUUUUA  
320 CGGGCACACGACCCUCCUGUUGUGGCUUGAAGAAAGCUUCGGGUCUCCUCCUCCUCCGAGACCGCGGCUUUAUAAACGUCCUCCUCCUCCUCCGAAUGGUAUGGGGACGUAAGAAAGACGGCGGUGCUUCCUCCAAAGCACCGCCGUUCUGCAUCU  
321 CGGGCACACGACCCUCCUGUUGUGGCUUGAAGAAAGCUUCGGGUCUCCUCCUCCUCCGAGACCGCGGCUUUAUAAACGUCCUCCUCCUCCUCCGAAUGGUAUGGGGACGUAAGAAAGACGGCGGUGCUUCCUCCAAAGCACCGCCGUUCUGCAUCU





# Cuckoo  
RNA del Val et al. 2007 Valverde et al. 2008 Livny et al. 2008 Berghoff et al. 2009 Vercruyse et al. 2010 Schlüter et al. 2010 Reinkensmeier et al. 2011 del Val et al. 2012 Wilms et al. 2012

---

46  
47  
48  
49  
50  
51  
52  
53  
54  
55  
56  
57  
58  
59  
60  
61  
62  
63  
64  
65  
66  
67  
68  
69  
70  
71  
72  
73  
74  
75  
76  
77  
78  
79  
80  
81  
82  
83  
84  
85  
86  
87  
88  
89  
90  
91  
92  
93

RSs0680d  
RSs0680c repeat3  
RSs0680c repeat2  
RSs0680c repeat1  
RSs0680c  
RSs0680b  
RSs0680a  
  
RSs0680a homolog  
  
RSs0680a homolog  
  
RSs0680a homolog  
RSs0680a homolog

| # Cuckoo RNA | del Val et al. 2007 | Valverde et al. 2008 | Livny et al. 2008 | Berghoff et al. 2009 | Vercruyse et al. 2010 | Schlüter et al. 2010 | Reinkensmeier et al. 2011 | del Val et al. 2012 | Wilms et al. 2012 |
|--------------|---------------------|----------------------|-------------------|----------------------|-----------------------|----------------------|---------------------------|---------------------|-------------------|
| 94           |                     |                      |                   | RSs0680a homolog     |                       |                      |                           |                     |                   |
| 95           |                     |                      |                   | RSs0680a homolog     |                       |                      |                           |                     |                   |
| 96           |                     |                      |                   |                      |                       |                      |                           |                     |                   |
| 97           |                     |                      |                   |                      |                       |                      |                           |                     |                   |
| 98           |                     |                      |                   |                      |                       |                      |                           |                     |                   |
| 99           |                     |                      |                   | RSs0680a homolog     |                       |                      |                           |                     |                   |
| 100          |                     |                      |                   |                      |                       |                      |                           |                     |                   |
| 101          |                     |                      |                   |                      |                       |                      |                           |                     |                   |
| 102          |                     |                      |                   |                      |                       |                      |                           |                     |                   |
| 103          |                     |                      |                   |                      |                       |                      |                           |                     |                   |
| 104          |                     |                      |                   | RSs0680a homolog     |                       |                      |                           |                     |                   |
| 105          |                     |                      |                   |                      |                       |                      |                           |                     |                   |
| 106          |                     |                      |                   |                      |                       |                      | RNA10                     | Atr14C2             |                   |
| 107          |                     |                      |                   |                      |                       |                      | RNA15                     | Arr14Cl1            |                   |
| 108          |                     |                      |                   |                      |                       |                      | RNA37                     | Arr14Cl2            |                   |
| 109          |                     |                      |                   |                      |                       |                      | RNA20                     | Arr14Cl3            |                   |
| 110          |                     |                      |                   |                      |                       |                      | RNA7                      | AH13r14C1           |                   |
| 111          |                     |                      |                   |                      |                       |                      | RNA9                      |                     |                   |
| 112          |                     |                      |                   |                      |                       |                      | RNA23                     | Avr14Atc            |                   |
| 113          |                     |                      |                   |                      |                       |                      | RNA38                     | Avr14Cl1            |                   |
| 114          |                     |                      |                   |                      |                       |                      | RNA48                     | Avr14Cl2            |                   |
| 115          |                     |                      |                   |                      |                       |                      |                           |                     |                   |
| 116          |                     |                      |                   |                      |                       |                      |                           |                     |                   |
| 117          |                     |                      |                   |                      |                       |                      | RNA78                     |                     |                   |
| 118          |                     |                      |                   |                      |                       |                      | RNA63                     | BaS19r14Cl1         |                   |
| 119          |                     |                      |                   |                      |                       |                      | RNA62                     | Ba19941r14Cl1       |                   |
| 120          |                     |                      |                   |                      |                       |                      | RNA59                     | Bcr14Cl1            |                   |
| 121          |                     |                      |                   |                      |                       |                      |                           |                     |                   |
| 122          |                     |                      |                   |                      |                       |                      | RNA66                     | Bm23457r14Cl1       |                   |
| 123          |                     |                      |                   |                      |                       |                      | RNA65                     |                     |                   |
| 124          |                     |                      |                   |                      |                       |                      |                           |                     |                   |
| 125          |                     |                      |                   |                      |                       |                      |                           |                     |                   |
| 126          |                     |                      |                   |                      |                       |                      | RNA64                     | Bmar14Cl1           |                   |
| 127          |                     |                      |                   |                      |                       |                      | RNA67                     | Bm16Mr14Cl2         |                   |
| 128          |                     |                      |                   |                      |                       |                      | RNA57                     | Bmir14Cl1           |                   |
| 129          |                     |                      |                   |                      |                       |                      | RNA61                     | Bor14Cl1            |                   |
| 130          |                     |                      |                   |                      |                       |                      |                           |                     |                   |
| 131          |                     |                      |                   |                      |                       |                      |                           |                     |                   |
| 132          |                     |                      |                   |                      |                       |                      | RNA77                     |                     |                   |
| 133          |                     |                      |                   |                      |                       |                      | RNA70                     | Bs1330r14Cl1        |                   |
| 134          |                     |                      |                   |                      |                       |                      | RNA79                     |                     |                   |
| 135          |                     |                      |                   |                      |                       |                      | RNA58                     | Bs23445r14Cl1       |                   |
| 136          |                     |                      |                   |                      |                       |                      |                           |                     |                   |
| 137          |                     |                      |                   |                      |                       |                      |                           |                     |                   |
| 138          |                     |                      |                   |                      |                       |                      | RNA82                     |                     |                   |
| 139          |                     |                      |                   |                      |                       |                      |                           | MsBCNr14p1          |                   |
| 140          |                     |                      |                   |                      |                       |                      | RNA28                     | MsBCNr14Cl1         |                   |
| 141          |                     |                      |                   |                      |                       |                      | RNA32                     | MsBCNr14C2          |                   |

| # Cuckoo RNA | del Val et al. 2007 | Valverde et al. 2008 | Livny et al. 2008       | Berghoff et al. 2009 | Vercruyse et al. 2010 | Schlüter et al. 2010 | Reinkensmeier et al. 2011 | del Val et al. 2012 | Wilms et al. 2012 |
|--------------|---------------------|----------------------|-------------------------|----------------------|-----------------------|----------------------|---------------------------|---------------------|-------------------|
| 142          |                     |                      |                         |                      |                       |                      |                           |                     |                   |
| 143          |                     |                      |                         |                      |                       |                      |                           |                     |                   |
| 144          |                     |                      |                         |                      |                       |                      |                           |                     |                   |
| 145          |                     |                      |                         | RSs0680a homolog     |                       |                      |                           |                     |                   |
| 146          |                     |                      |                         |                      |                       |                      |                           |                     |                   |
| 147          |                     |                      |                         |                      |                       |                      |                           |                     |                   |
| 148          |                     |                      |                         |                      |                       |                      |                           |                     |                   |
| 149          |                     |                      |                         |                      |                       |                      |                           |                     |                   |
| 150          |                     |                      |                         |                      |                       |                      |                           |                     |                   |
| 151          |                     |                      |                         |                      |                       |                      | RNA69                     | Mcr14p01            |                   |
| 152          |                     |                      |                         |                      |                       |                      | RNA80                     | Mcr14C4             |                   |
| 153          |                     |                      |                         |                      |                       |                      | RNA50                     | Mcr14C1             |                   |
| 154          |                     |                      |                         |                      |                       |                      | RNA53                     | Mcr14C2             |                   |
| 155          |                     |                      |                         |                      |                       |                      | RNA36                     | Mcr14C3             |                   |
| 156          |                     |                      |                         |                      |                       |                      | RNA71                     | Mcr14C5             |                   |
| 157          |                     |                      |                         |                      |                       |                      | RNA52                     | Mlr14C1             |                   |
| 158          |                     |                      |                         |                      |                       |                      | RNA51                     | Mlr14C2             |                   |
| 159          |                     |                      |                         |                      |                       |                      | RNA49                     | Mlr14C3             |                   |
| 160          |                     |                      |                         |                      |                       |                      | RNA68                     |                     |                   |
| 161          |                     |                      |                         |                      |                       |                      | RNA81                     | Mlr14C4             |                   |
| 162          |                     |                      |                         |                      |                       |                      | RNA72                     | Mlr14C5             |                   |
| 163          |                     |                      |                         |                      |                       |                      |                           |                     |                   |
| 164          |                     |                      |                         |                      |                       |                      |                           |                     |                   |
| 165          |                     |                      |                         |                      |                       |                      |                           |                     |                   |
| 166          |                     |                      |                         |                      |                       |                      |                           |                     |                   |
| 167          |                     |                      |                         |                      |                       |                      |                           |                     |                   |
| 168          |                     |                      |                         |                      |                       |                      |                           |                     |                   |
| 169          |                     |                      |                         |                      |                       |                      | RNA75                     | Oar14CI1            |                   |
| 170          |                     |                      |                         |                      |                       |                      | RNA76                     |                     |                   |
| 171          |                     |                      |                         |                      |                       |                      | RNA60                     | Oar14CI1            |                   |
| 172          |                     |                      | Candidate_13_NC_009668  |                      |                       |                      | RNA56                     | Oar14CI2            |                   |
| 173          |                     |                      |                         |                      |                       |                      |                           |                     |                   |
| 174          |                     |                      |                         |                      |                       |                      |                           |                     |                   |
| 175          |                     |                      |                         |                      |                       |                      |                           |                     |                   |
| 176          |                     |                      |                         |                      |                       |                      |                           |                     |                   |
| 177          |                     |                      | Candidate_154_NC_007761 |                      | ReC11                 |                      | RNA13                     | ReCFNr14C1          |                   |
| 178          |                     |                      | Candidate_69_NC_007761  |                      |                       |                      | RNA34                     | ReCFNr14C2          |                   |
| 179          |                     |                      | Candidate_150_NC_007761 |                      |                       |                      | RNA24                     | ReCFNr14C3          |                   |
| 180          |                     |                      |                         |                      |                       |                      |                           | ReCFNr14f           |                   |
| 181          |                     |                      |                         |                      |                       |                      | RNA11                     | ReCIATr14C1         |                   |
| 182          |                     |                      |                         |                      |                       |                      | RNA29                     | ReCIATr14C3         |                   |
| 183          |                     |                      |                         |                      |                       |                      | RNA14                     | ReCIATr14C4         |                   |
| 184          |                     |                      |                         |                      |                       |                      |                           |                     |                   |
| 185          |                     |                      |                         |                      |                       |                      |                           |                     |                   |
| 186          |                     |                      |                         |                      |                       |                      |                           |                     |                   |
| 187          |                     |                      |                         |                      |                       |                      |                           |                     |                   |
| 188          |                     |                      |                         |                      |                       |                      | RNA55                     | Rlt1325r14p011      |                   |
| 189          |                     |                      |                         |                      |                       |                      | RNA16                     | Rlt1325r14C1        |                   |

| # Cuckoo RNA | del Val et al. 2007 | Valverde et al. 2008 | Livny et al. 2008       | Berghoff et al. 2009 | Vercruyse et al. 2010 | Schlüter et al. 2010 | Reinkensmeier et al. 2011 | del Val et al. 2012 | Wilms et al. 2012 |
|--------------|---------------------|----------------------|-------------------------|----------------------|-----------------------|----------------------|---------------------------|---------------------|-------------------|
| 190          |                     |                      |                         |                      |                       |                      | RNA31                     | Rlt1325r14C2        |                   |
| 191          |                     |                      |                         |                      |                       |                      | RNA25                     | Rlt1325r14C3        |                   |
| 192          |                     |                      |                         |                      |                       |                      | RNA73                     | Rlt2304r14p011      |                   |
| 193          |                     |                      |                         |                      |                       |                      | RNA12                     | Rlt2304r14C1        |                   |
| 194          |                     |                      |                         |                      |                       |                      | RNA35                     | Rlt2304r14C2        |                   |
| 195          |                     |                      |                         |                      |                       |                      | RNA26                     | Rlt2304r14C3        |                   |
| 196          |                     |                      |                         |                      |                       |                      | RNA54                     | Rlvr14p12           |                   |
| 197          |                     |                      | Candidate_152_NC_008380 |                      |                       |                      | RNA17                     | Rlvr14C1            |                   |
| 198          |                     |                      |                         |                      |                       |                      | RNA42                     | Rlvr14C2            |                   |
| 199          |                     |                      |                         |                      |                       |                      | RNA19                     | Rlvr14C3            |                   |
| 200          |                     |                      |                         |                      |                       |                      |                           |                     |                   |
| 201          |                     |                      |                         |                      |                       |                      |                           |                     |                   |
| 202          |                     |                      |                         |                      |                       |                      |                           |                     |                   |
| 203          |                     |                      |                         |                      |                       |                      |                           |                     |                   |
| 204          |                     |                      |                         |                      |                       |                      |                           |                     |                   |
| 205          |                     |                      |                         |                      |                       |                      |                           |                     |                   |
| 206          |                     |                      |                         |                      |                       |                      |                           |                     |                   |
| 207          |                     |                      |                         |                      |                       |                      |                           |                     |                   |
| 208          |                     |                      |                         |                      |                       |                      |                           |                     |                   |
| 209          |                     |                      |                         |                      |                       |                      |                           |                     |                   |
| 210          |                     |                      |                         |                      |                       |                      | RNA74                     | Sfr14b              |                   |
| 211          |                     |                      |                         |                      |                       |                      | RNA33                     | Sfr14C1             |                   |
| 212          |                     |                      |                         |                      |                       |                      | RNA39                     | Sfr14C2             |                   |
| 213          |                     |                      |                         |                      |                       |                      | RNA6                      | Sfr14C3             |                   |
| 214          |                     |                      |                         |                      |                       |                      |                           |                     |                   |
| 215          |                     |                      |                         |                      |                       |                      |                           |                     |                   |
| 216          |                     |                      |                         |                      |                       |                      |                           |                     |                   |
| 217          |                     |                      |                         |                      |                       |                      |                           |                     |                   |
| 218          |                     |                      |                         |                      |                       |                      |                           |                     |                   |
| 219          |                     |                      |                         |                      |                       |                      |                           |                     |                   |
| 220          |                     |                      |                         |                      |                       |                      | RNA43                     | Smedr14p01          |                   |
| 221          |                     |                      |                         |                      |                       |                      | RNA27                     | Smedr14C1           |                   |
| 222          |                     |                      |                         |                      |                       |                      | RNA47                     | Smedr14C2           |                   |
| 223          |                     |                      | Candidate_35_NC_009636  |                      |                       |                      | RNA5                      | Smedr14C3           |                   |
| 224          |                     |                      |                         |                      |                       | SmelA075             | SmelA075                  | Smr14A1             |                   |
| 225          |                     |                      |                         |                      |                       | SmelC025             | RNA4                      | Smr14C1             |                   |
| 226          | C14                 | smrC14               |                         |                      |                       | SmelC397             | RNA22                     | Smr14C2             |                   |
| 227          |                     | sm7                  |                         |                      |                       | SmelC398             | RNA45                     | Smr14C3             |                   |
| 228          |                     |                      |                         |                      |                       | SmelB161             | RNA30                     | Smr14B              |                   |
| 229          |                     |                      |                         |                      |                       |                      |                           |                     |                   |
| 230          |                     |                      |                         |                      |                       |                      |                           |                     |                   |
| 231          |                     |                      |                         |                      |                       |                      |                           |                     |                   |
| 232          |                     |                      |                         |                      |                       |                      |                           |                     |                   |
| 233          |                     |                      |                         |                      |                       |                      |                           |                     |                   |
| 234          |                     |                      |                         |                      |                       |                      | RNA18                     |                     |                   |
| 235          |                     |                      |                         |                      |                       |                      | RNA44                     |                     |                   |
| 236          |                     |                      |                         |                      |                       |                      | RNA3                      |                     |                   |
| 237          |                     |                      |                         |                      |                       |                      | RNA40                     |                     |                   |



| # Cuckoo RNA | del Val et al. 2007 | Valverde et al. 2008 | Livny et al. 2008 | Berghoff et al. 2009 | Vercruyse et al. 2010 | Schlüter et al. 2010 | Reinkensmeier et al. 2011 | del Val et al. 2012 | Wilms et al. 2012 |
|--------------|---------------------|----------------------|-------------------|----------------------|-----------------------|----------------------|---------------------------|---------------------|-------------------|
|--------------|---------------------|----------------------|-------------------|----------------------|-----------------------|----------------------|---------------------------|---------------------|-------------------|

286  
287  
288  
289  
290  
291  
292  
293  
294  
295  
296  
297  
298  
299  
300  
301  
302  
303  
304  
305  
306  
307  
308  
309  
310  
311  
312  
313  
314  
315  
316  
317  
318  
319  
320  
321

Candidate\_7\_NC\_004041  
Candidate\_5\_NC\_007765

RNA22 ReCFNr14d  
RNA15 ReCFNr14e  
RNA13 ReCIATr14C2  
RNA23 ReCIATr14B  
RNA7 ReCIATr14A

RNA21 Rlt1325r14p012  
RNA24 Rlt1325r14p04  
RNA18 Rlt1325r14p05  
RNA14 Rlt1325r14p02  
RNA9 Rlt2304r14p02  
RNA17 Rlt2304r14p012  
RNA16 Rlvr14p11

Candidate\_14\_NC\_009621

A6

SmelA099

RNA3 Smedr14p021  
RNA4 Smedr14p022  
SmelA099 Smr14A2

RNA1  
RNA2
